# Supplementary material for: A straightforward synthesis of 2-aminobenzothiazoles from Herz compounds
Source: Royal Society of Chemistry journal article supplement (doi:10.1039/c1ob05398a), 2011-01-01

## SUPPORTING INFORMATION

### A straightforward synthesis of 2-amino-benzothiazoles from Herz compounds

Ana G. Neo, Rosa M. Carrillo, and Carlos F. Marcos\*

*Laboratorio de Química Orgánica y Bioorgánica, LOBO, Departamento de Química Orgánica, Facultad de Veterinaria, Universidad de Extremadura, 10071 Cáceres, Spain*

#### TABLE OF CONTENTS

|                                           |     |
|-------------------------------------------|-----|
| <sup>1</sup> H-NMR of compound <b>3a</b>  | S2  |
| <sup>13</sup> C-NMR of compound <b>3a</b> | S3  |
| <sup>1</sup> H-NMR of compound <b>3b</b>  | S4  |
| <sup>13</sup> C-NMR of compound <b>3b</b> | S5  |
| <sup>1</sup> H-NMR of compound <b>3c</b>  | S6  |
| <sup>13</sup> C-NMR of compound <b>3c</b> | S7  |
| <sup>1</sup> H-NMR of compound <b>3d</b>  | S8  |
| <sup>13</sup> C-NMR of compound <b>3d</b> | S9  |
| <sup>1</sup> H-NMR of compound <b>3e</b>  | S10 |
| <sup>13</sup> C-NMR of compound <b>3e</b> | S11 |
| <sup>1</sup> H-NMR of compound <b>5a</b>  | S12 |
| <sup>13</sup> C-NMR of compound <b>5a</b> | S13 |
| <sup>1</sup> H-NMR of compound <b>5b</b>  | S14 |
| <sup>13</sup> C-NMR of compound <b>5b</b> | S15 |
| <sup>1</sup> H-NMR of compound <b>5c</b>  | S16 |
| <sup>13</sup> C-NMR of compound <b>5c</b> | S17 |
| <sup>1</sup> H-NMR of compound <b>5d</b>  | S18 |
| <sup>13</sup> C-NMR of compound <b>5d</b> | S19 |
| <sup>1</sup> H-NMR of compound <b>5e</b>  | S20 |
| <sup>13</sup> C-NMR of compound <b>5e</b> | S21 |
| <sup>1</sup> H-NMR of compound <b>5f</b>  | S22 |
| <sup>13</sup> C-NMR of compound <b>5f</b> | S23 |
| <sup>1</sup> H-NMR of compound <b>5g</b>  | S24 |
| <sup>13</sup> C-NMR of compound <b>5g</b> | S25 |
| <sup>1</sup> H-NMR of compound <b>5h</b>  | S26 |
| <sup>13</sup> C-NMR of compound <b>5h</b> | S27 |
| <sup>1</sup> H-NMR of compound <b>5i</b>  | S28 |
| <sup>13</sup> C-NMR of compound <b>5i</b> | S29 |
| <sup>1</sup> H-NMR of compound <b>5j</b>  | S30 |
| <sup>13</sup> C-NMR of compound <b>5j</b> | S31 |
| <sup>1</sup> H-NMR of compound <b>5k</b>  | S32 |
| <sup>13</sup> C-NMR of compound <b>5k</b> | S33 |
| <sup>1</sup> H-NMR of compound <b>5l</b>  | S34 |
| <sup>13</sup> C-NMR of compound <b>5l</b> | S35 |
| <sup>1</sup> H-NMR of compound <b>5m</b>  | S36 |
| <sup>13</sup> C-NMR of compound <b>5m</b> | S37 |
| <sup>1</sup> H-NMR of compound <b>5n</b>  | S38 |
| <sup>13</sup> C-NMR of compound <b>5n</b> | S39 |

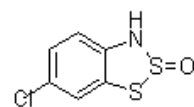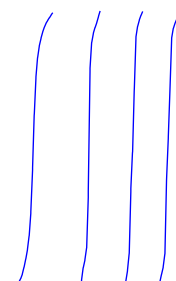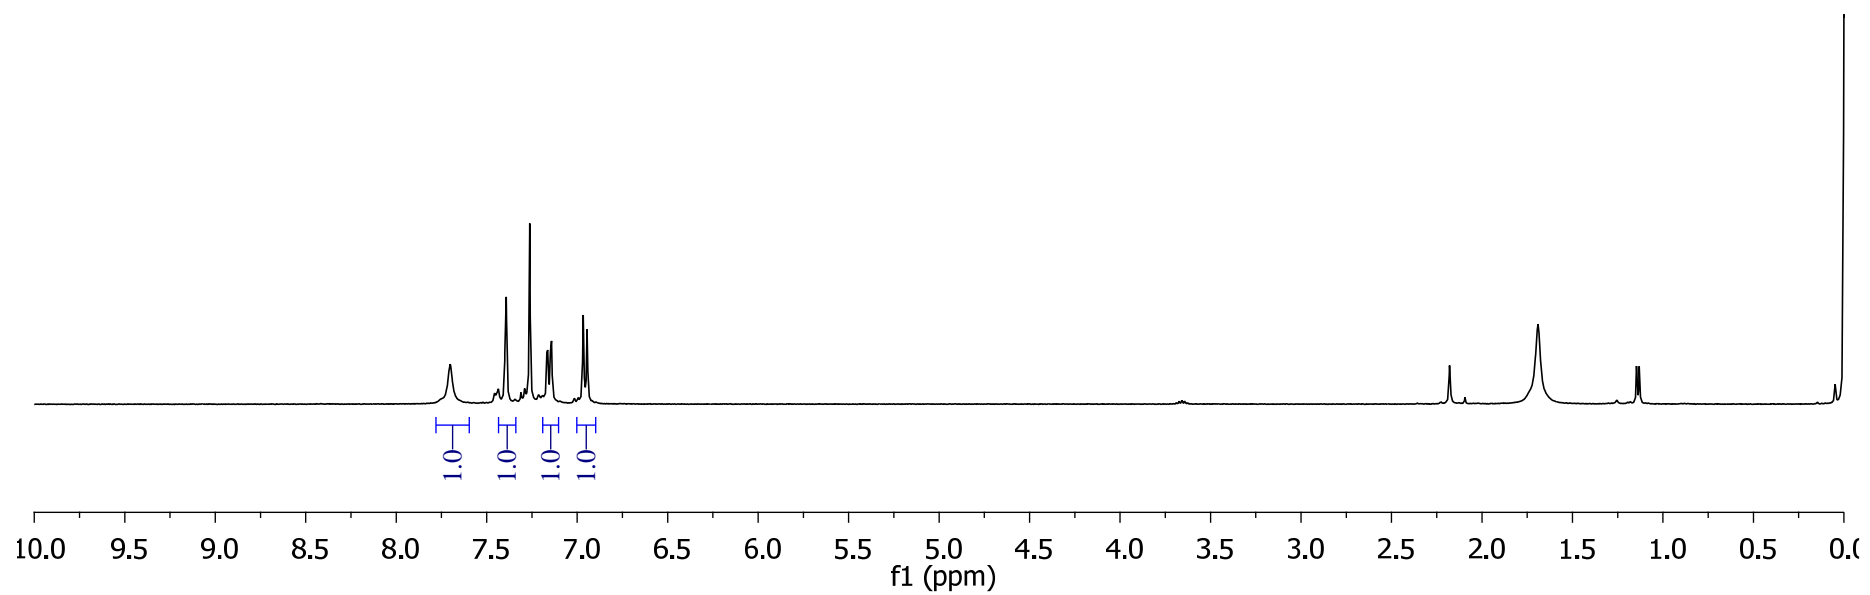

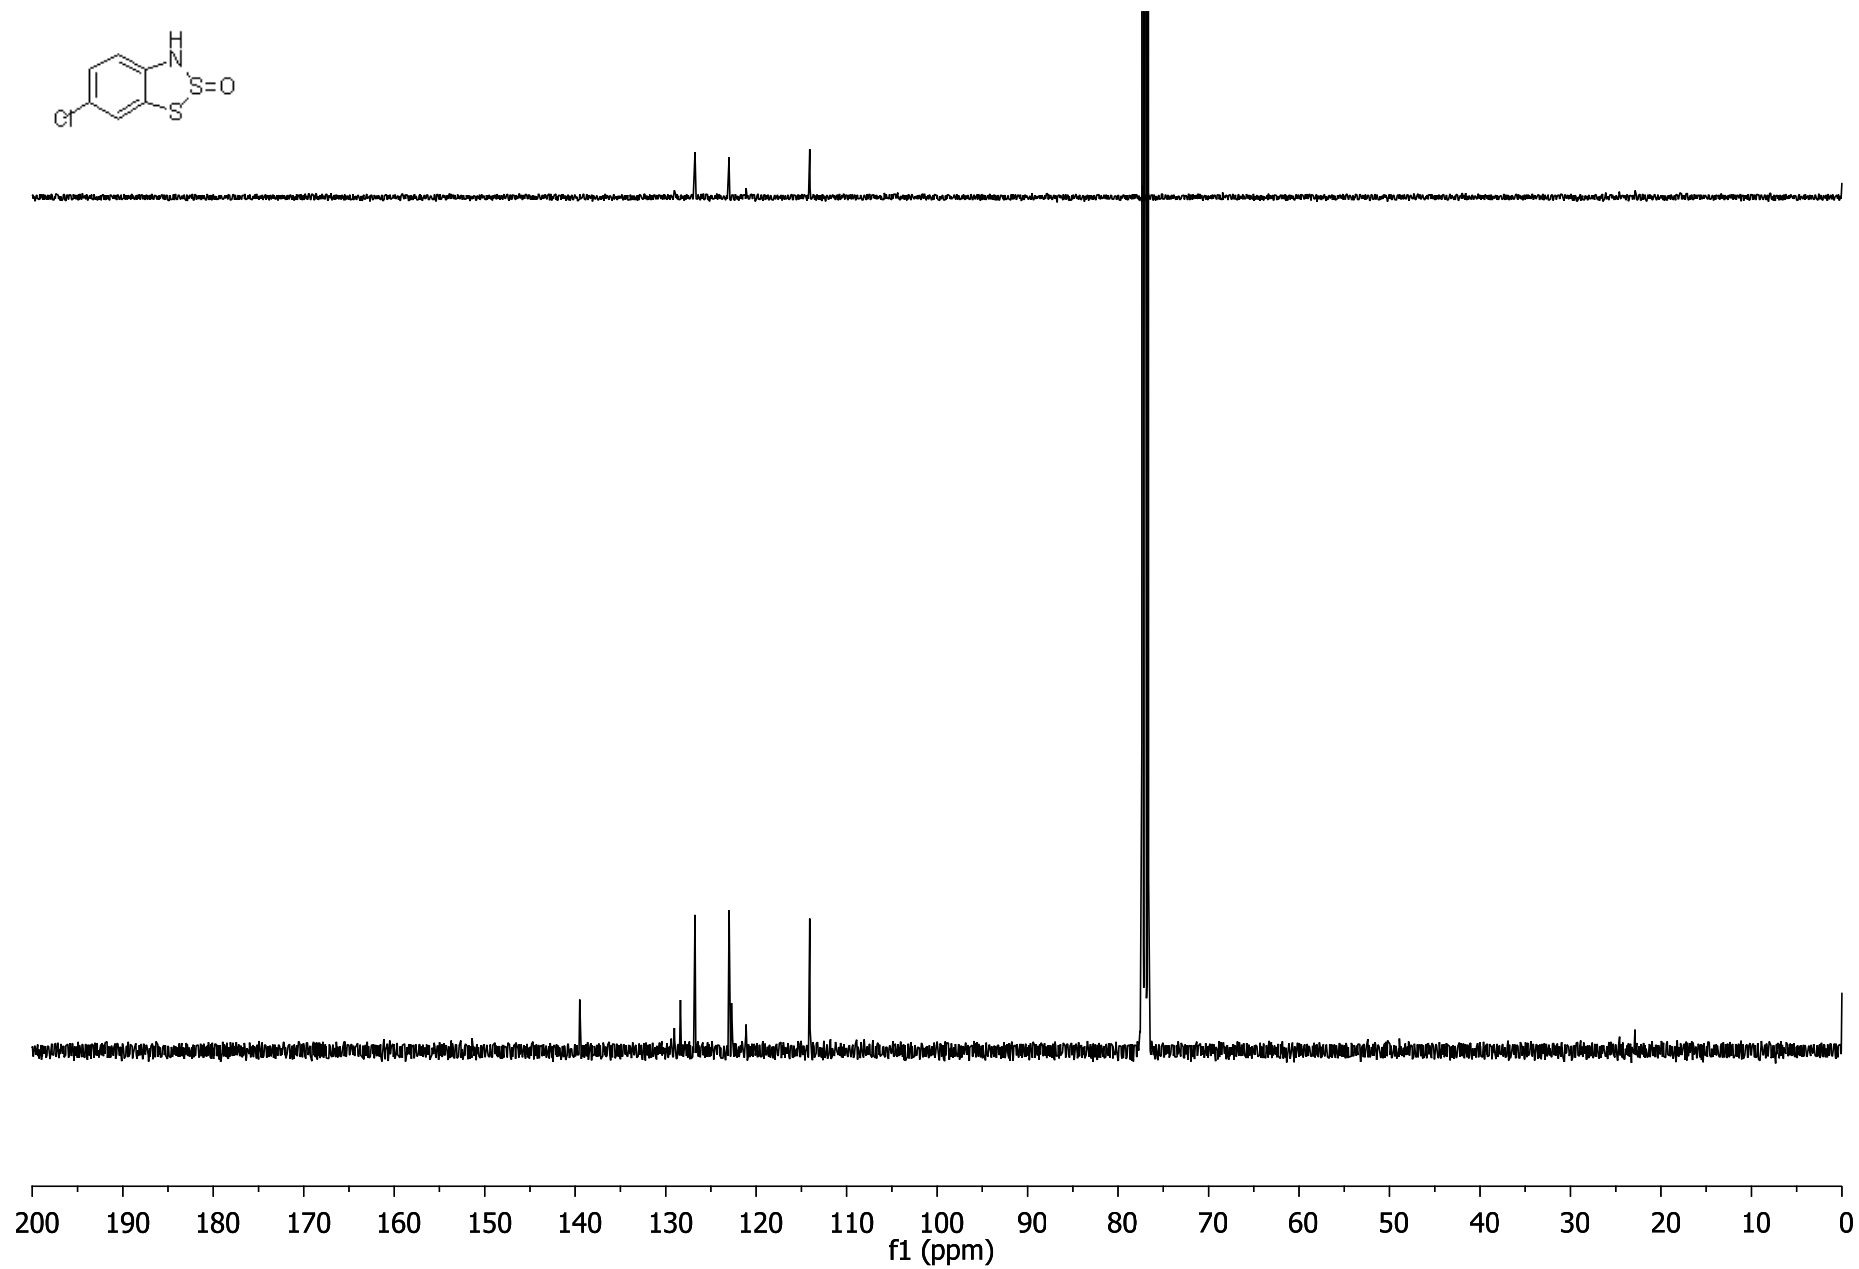

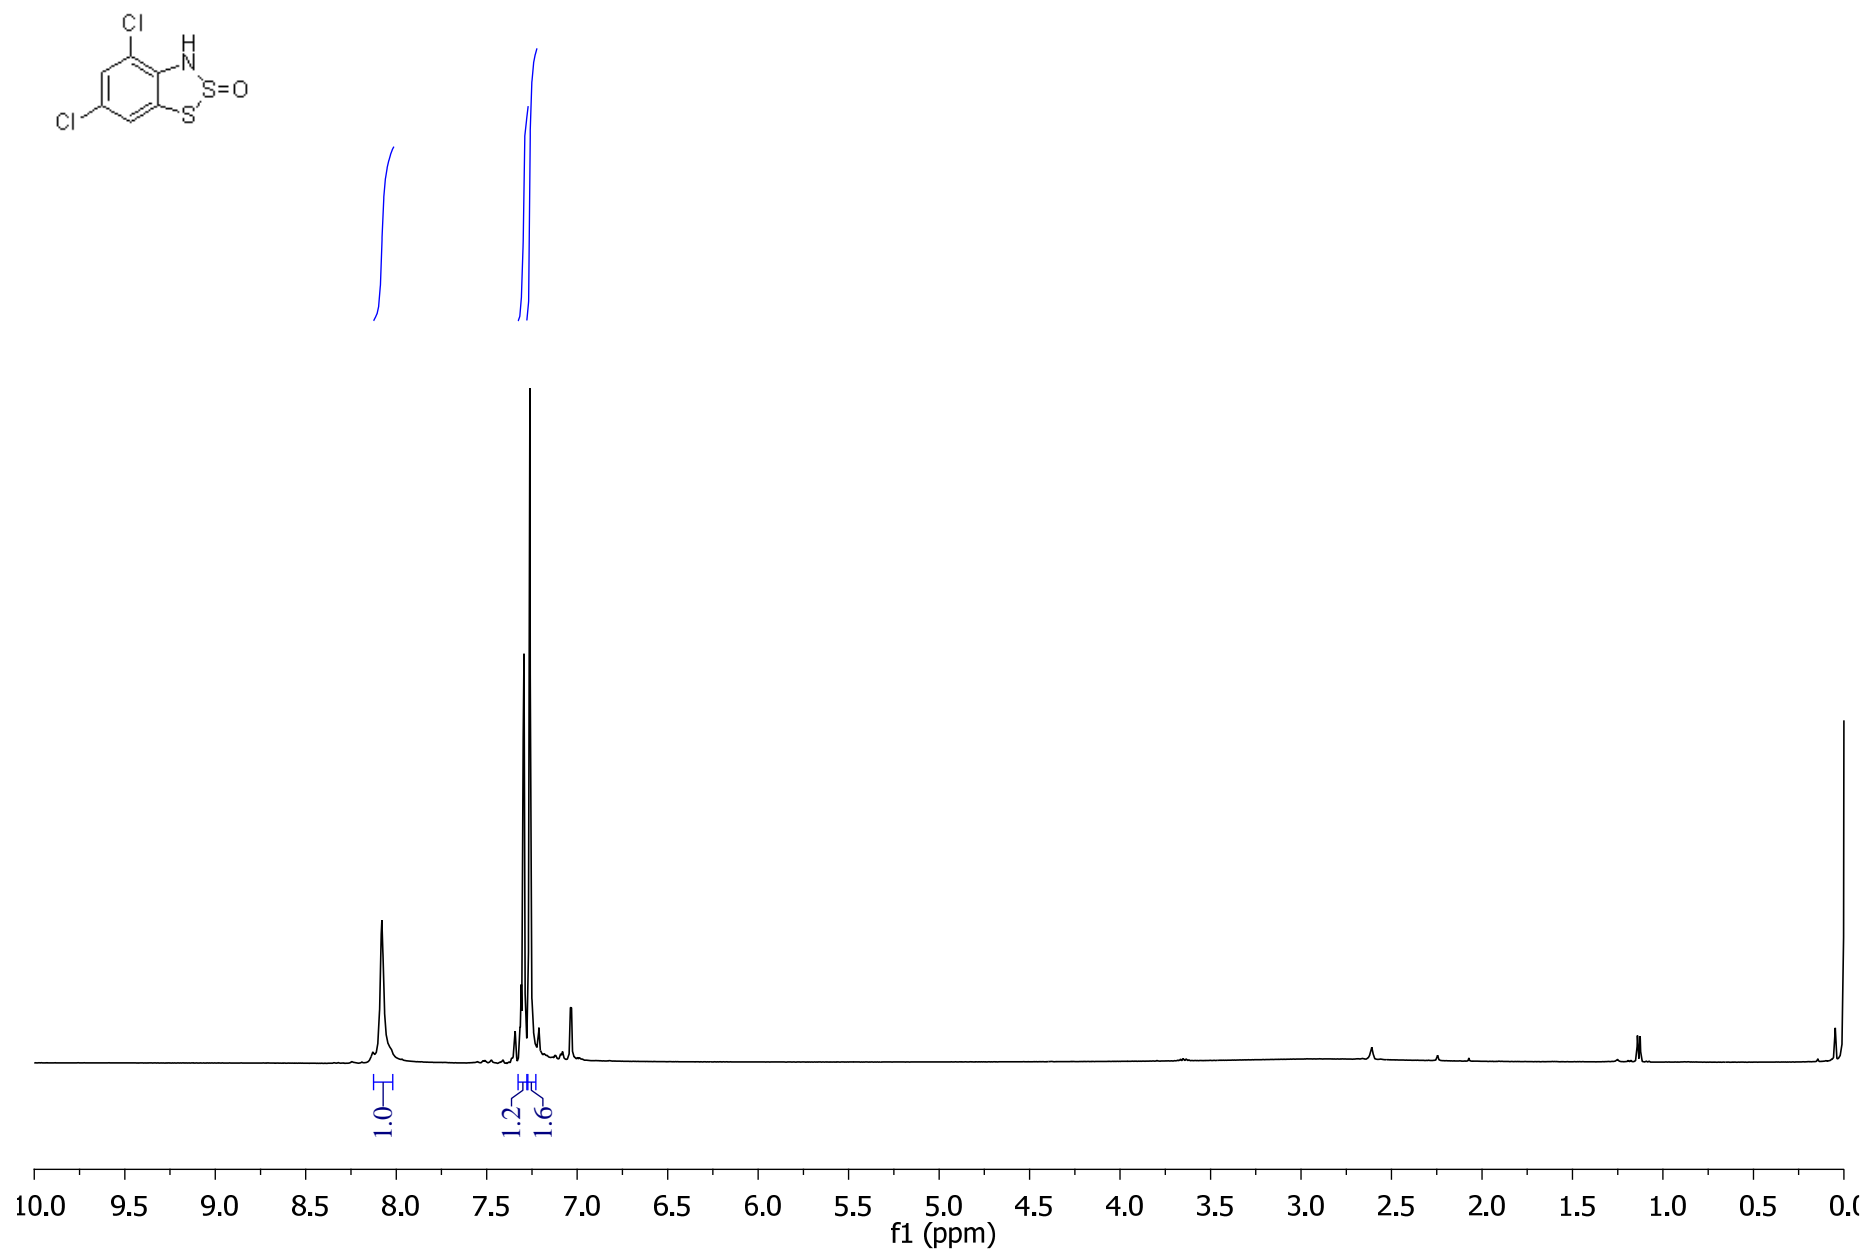

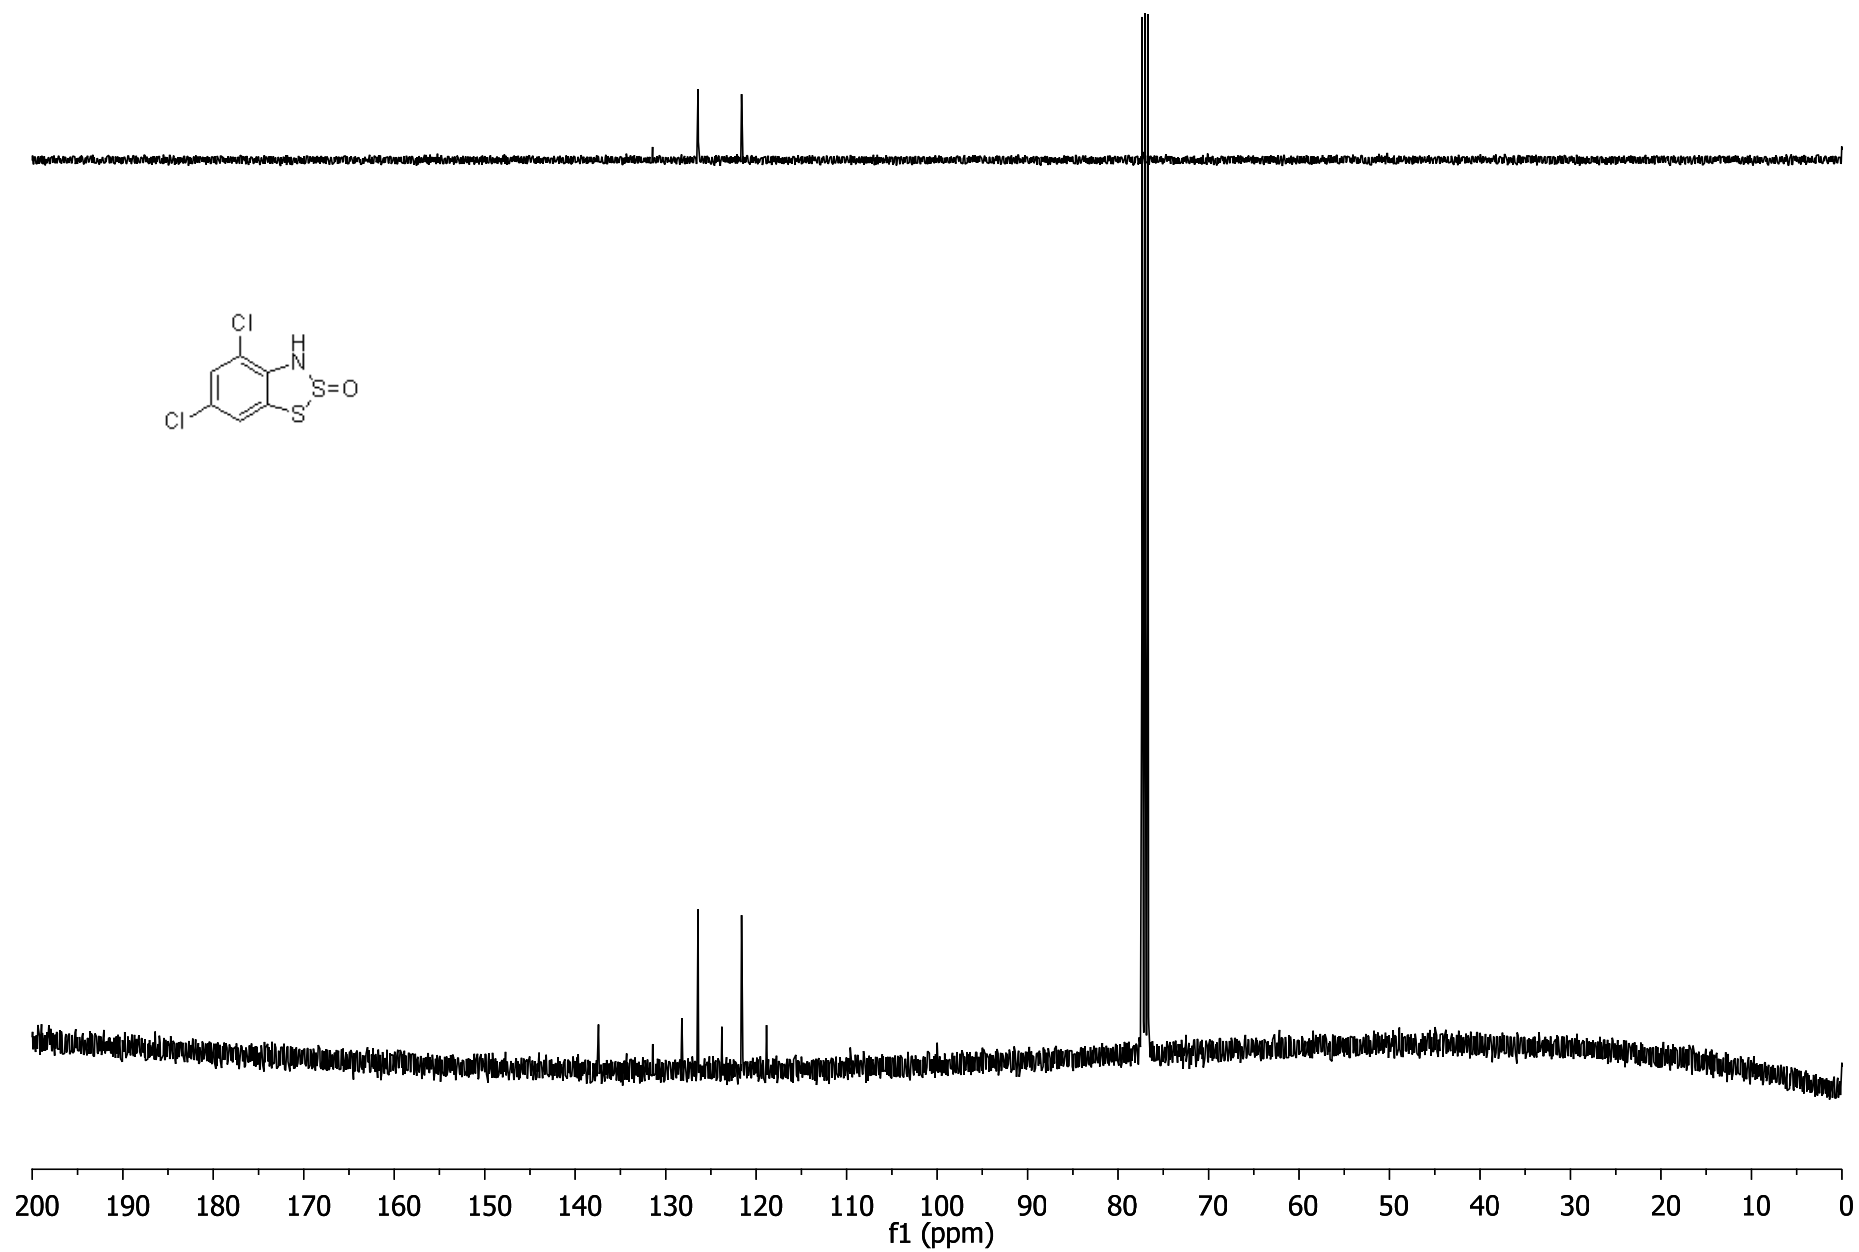

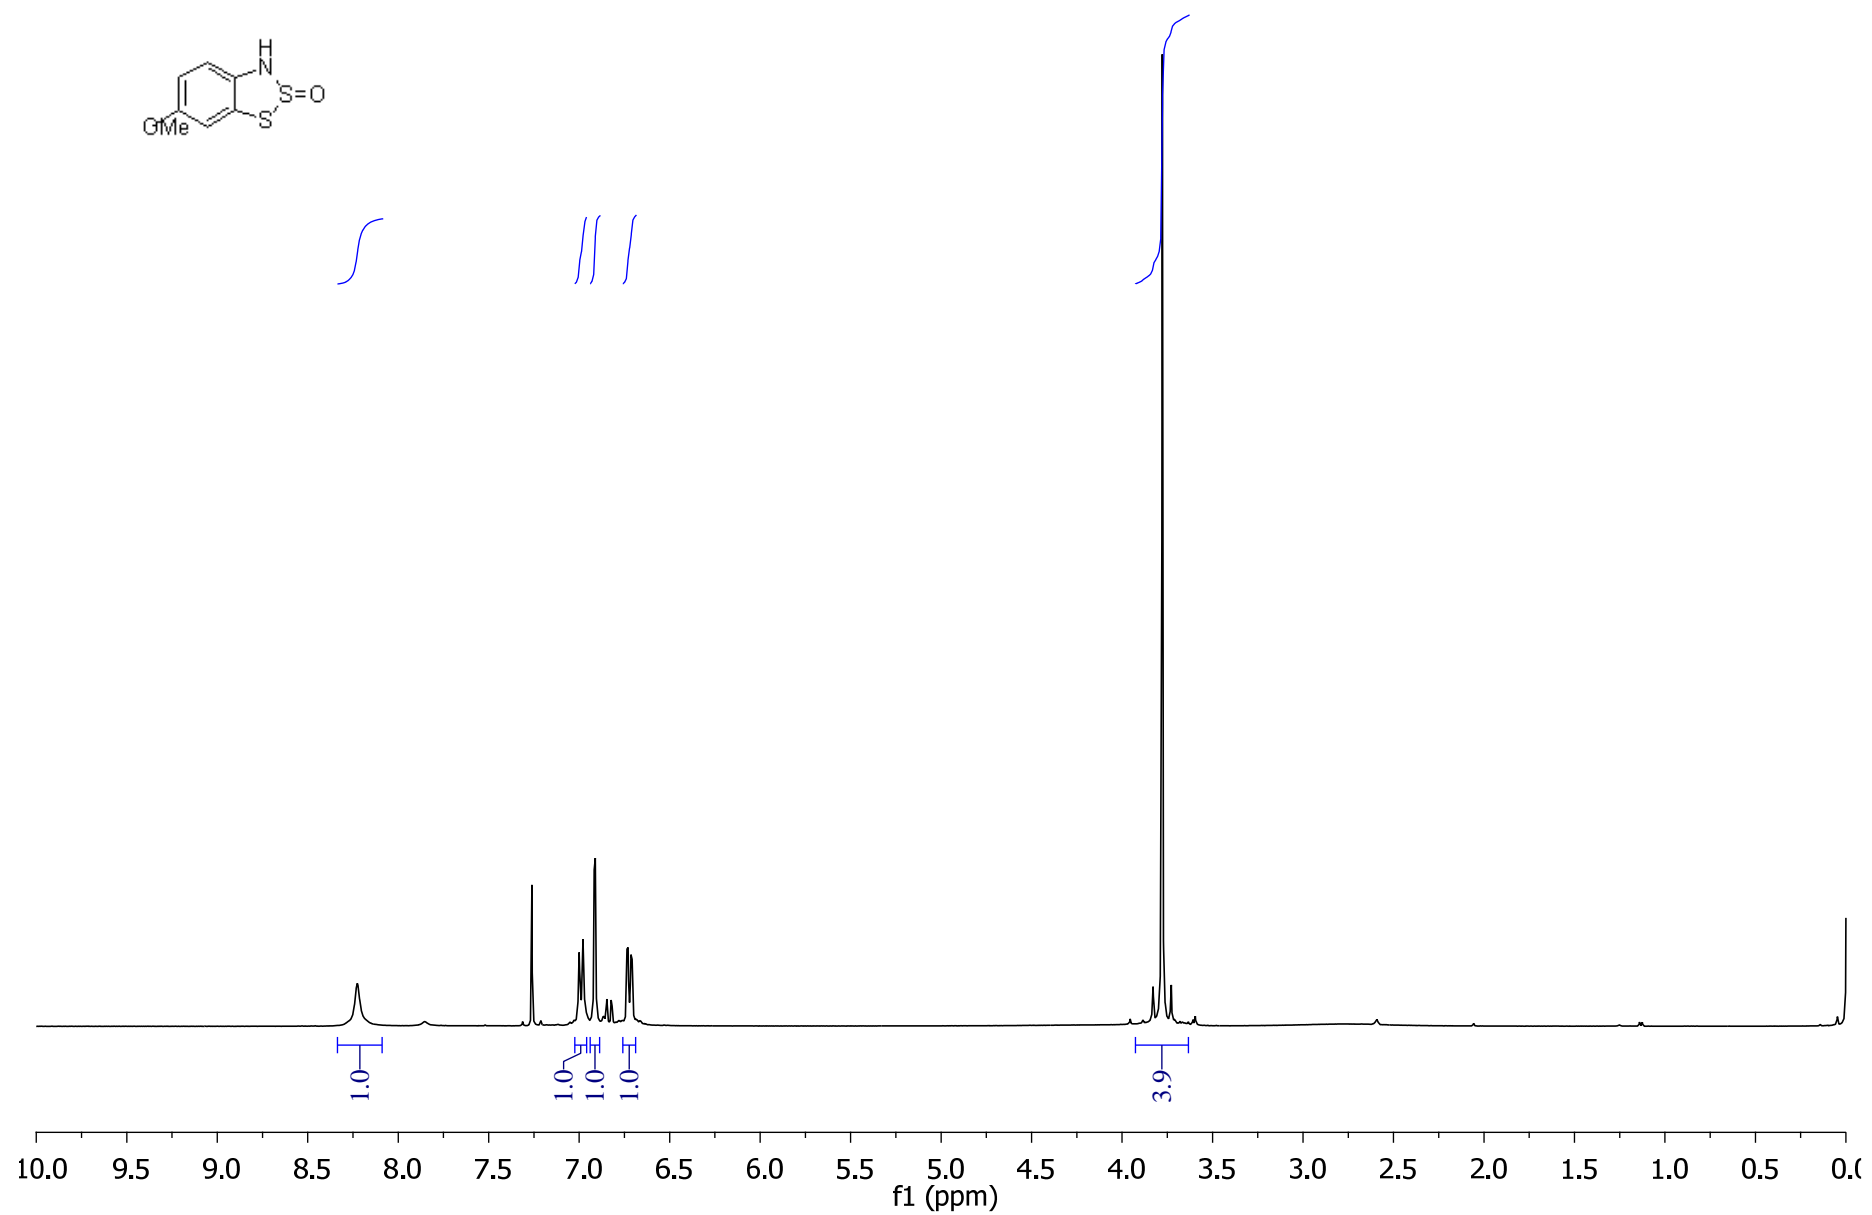

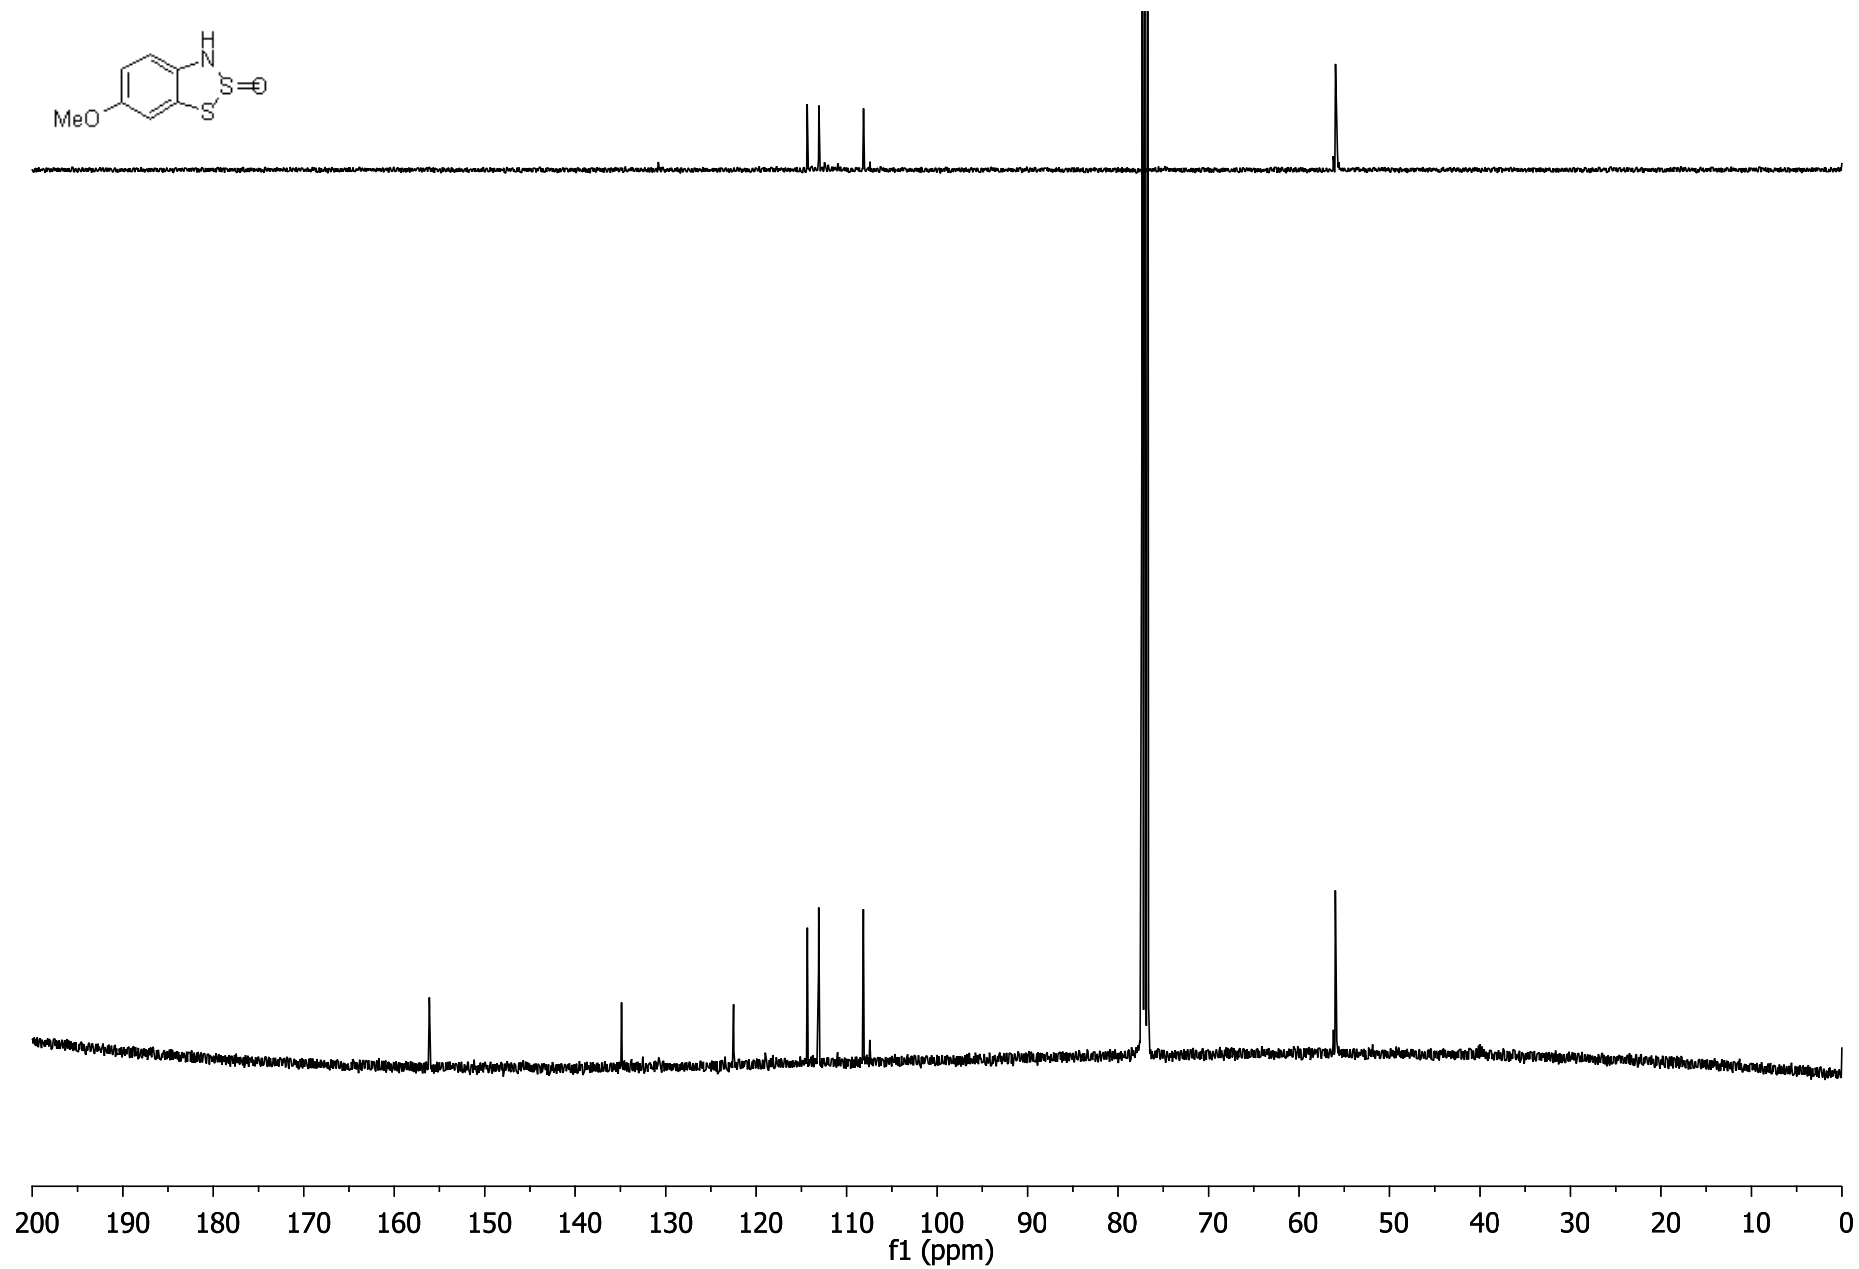

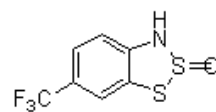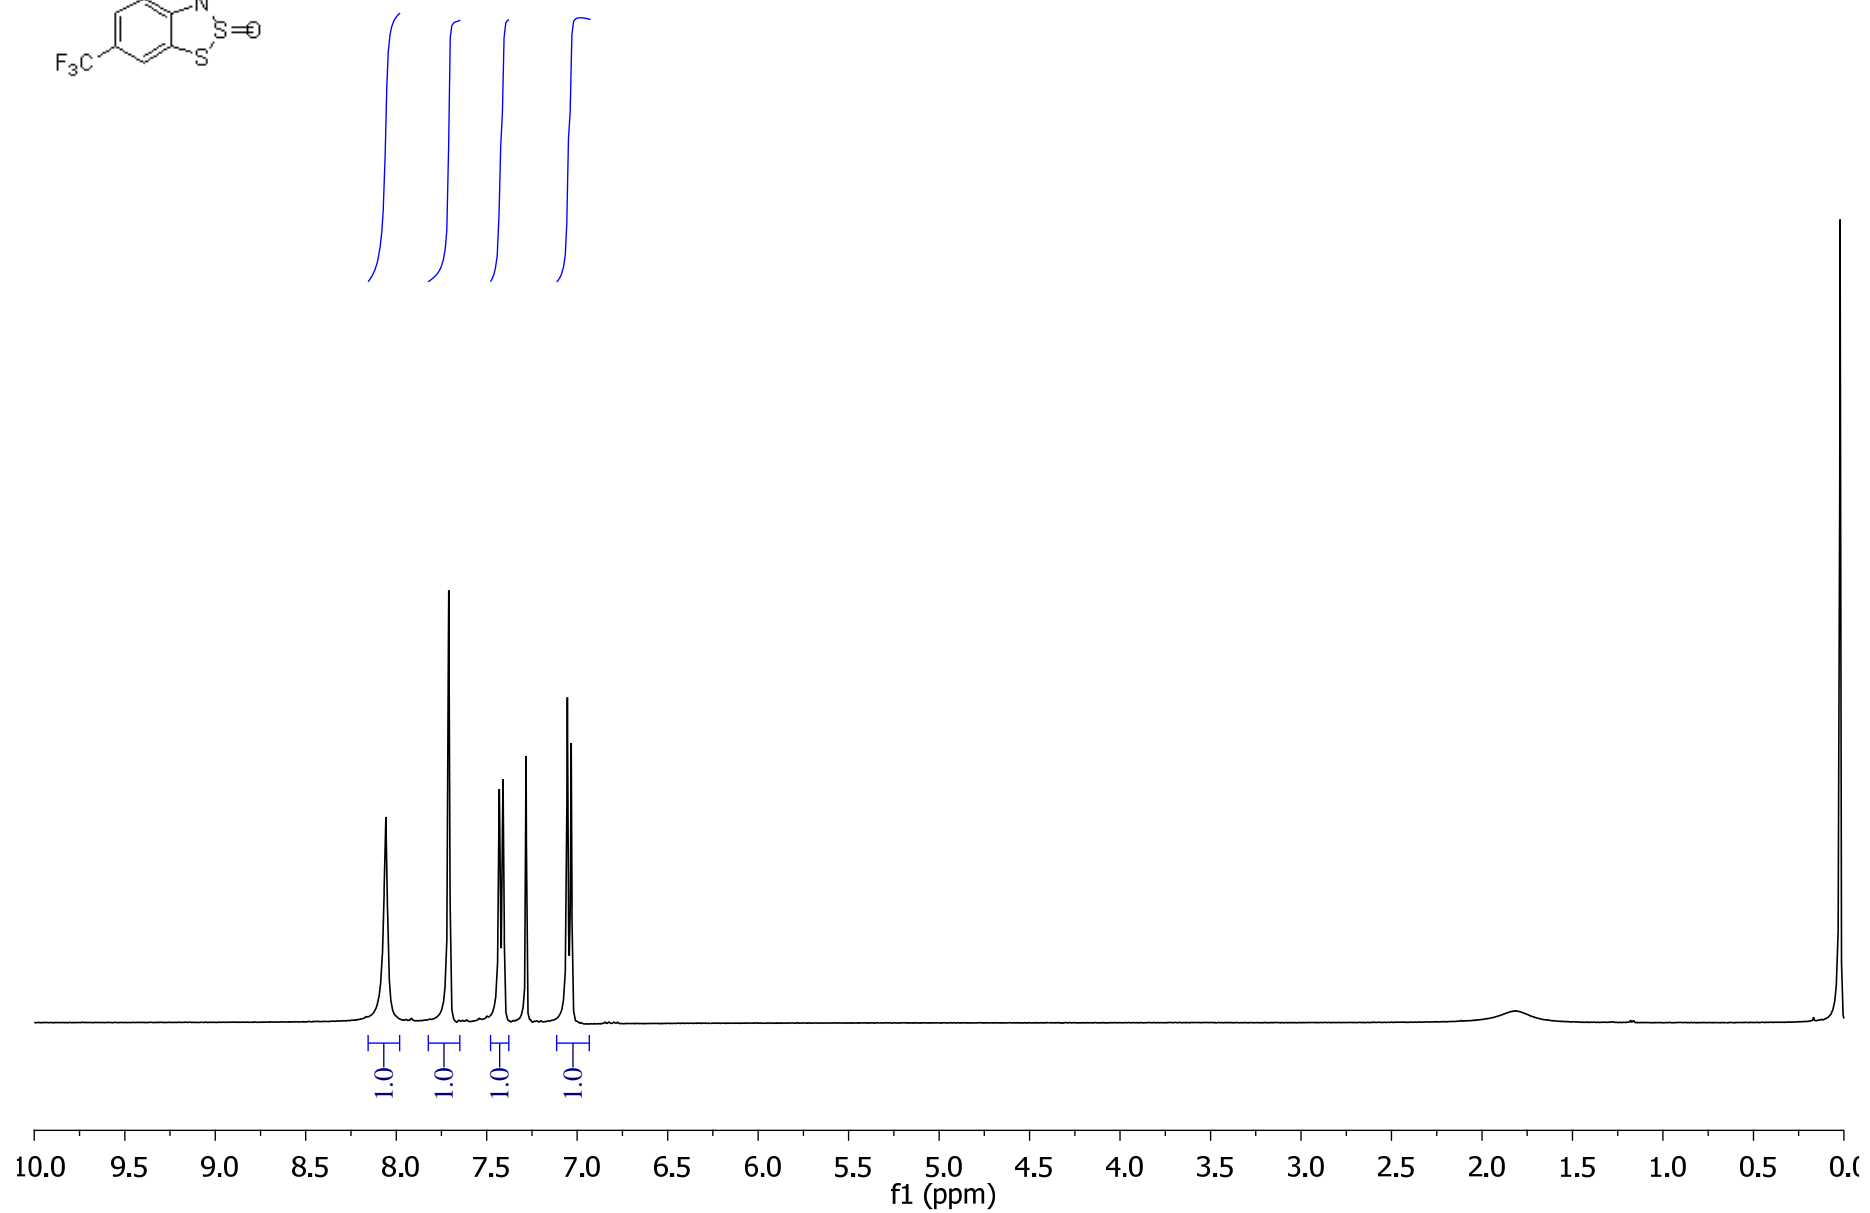



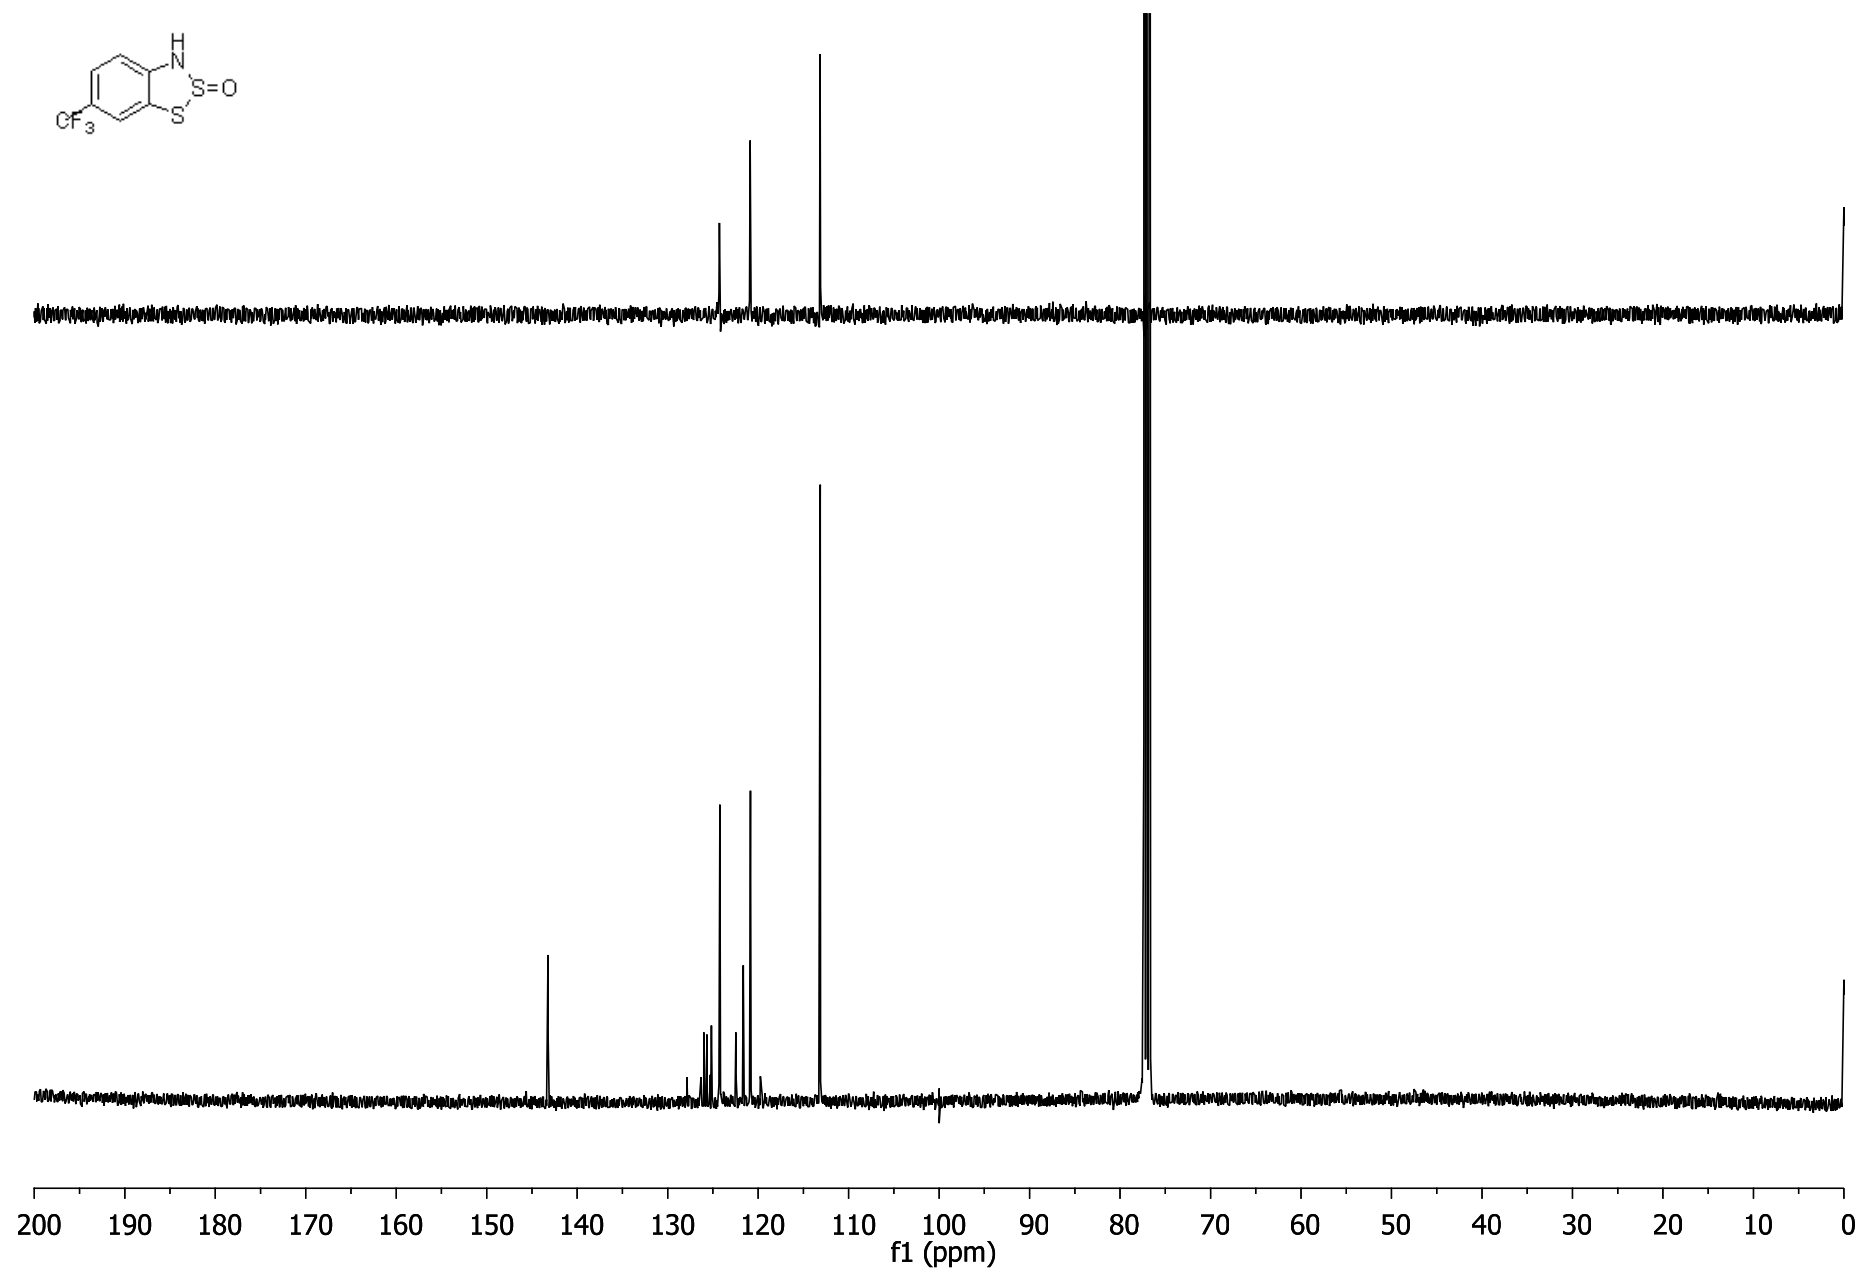

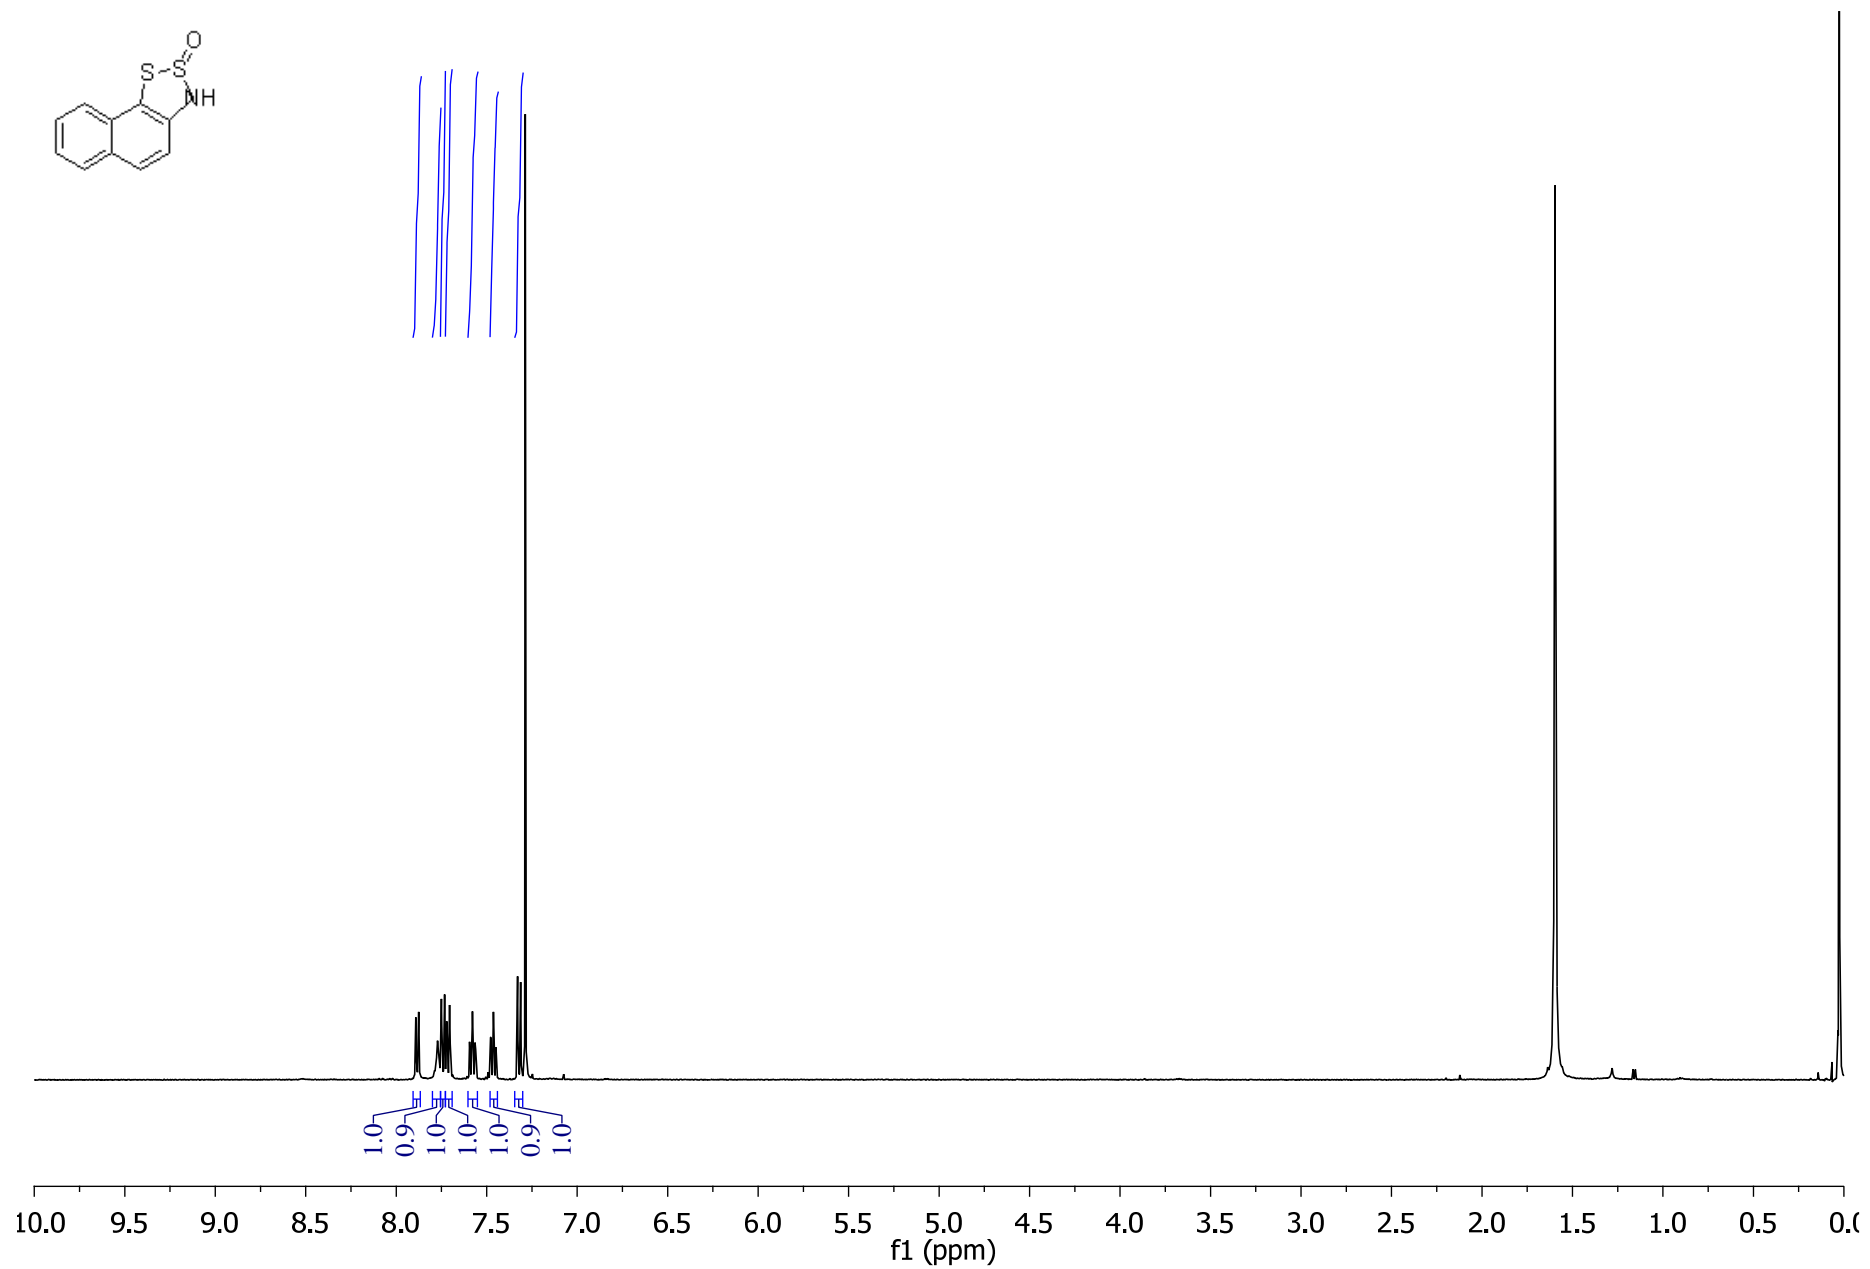

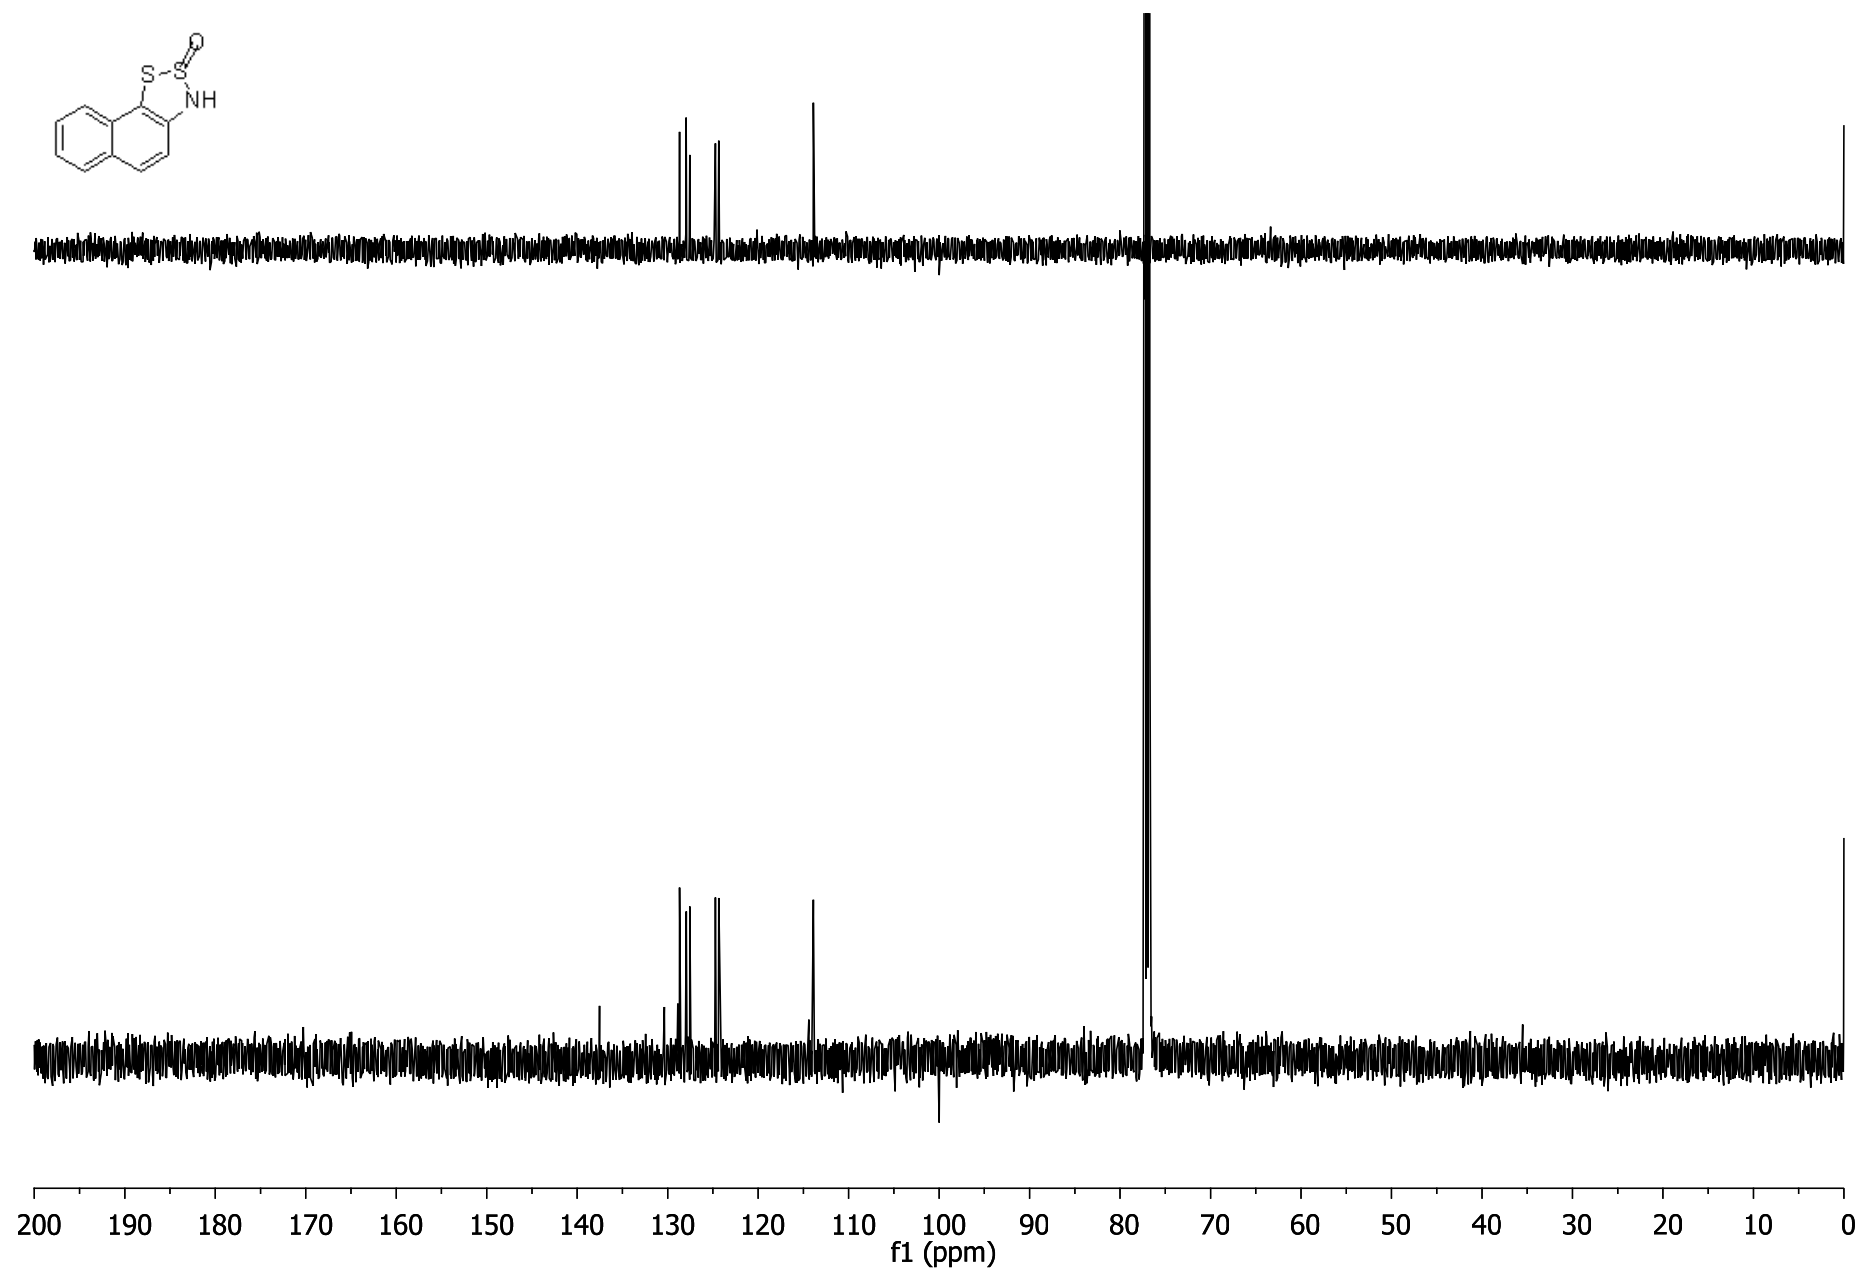

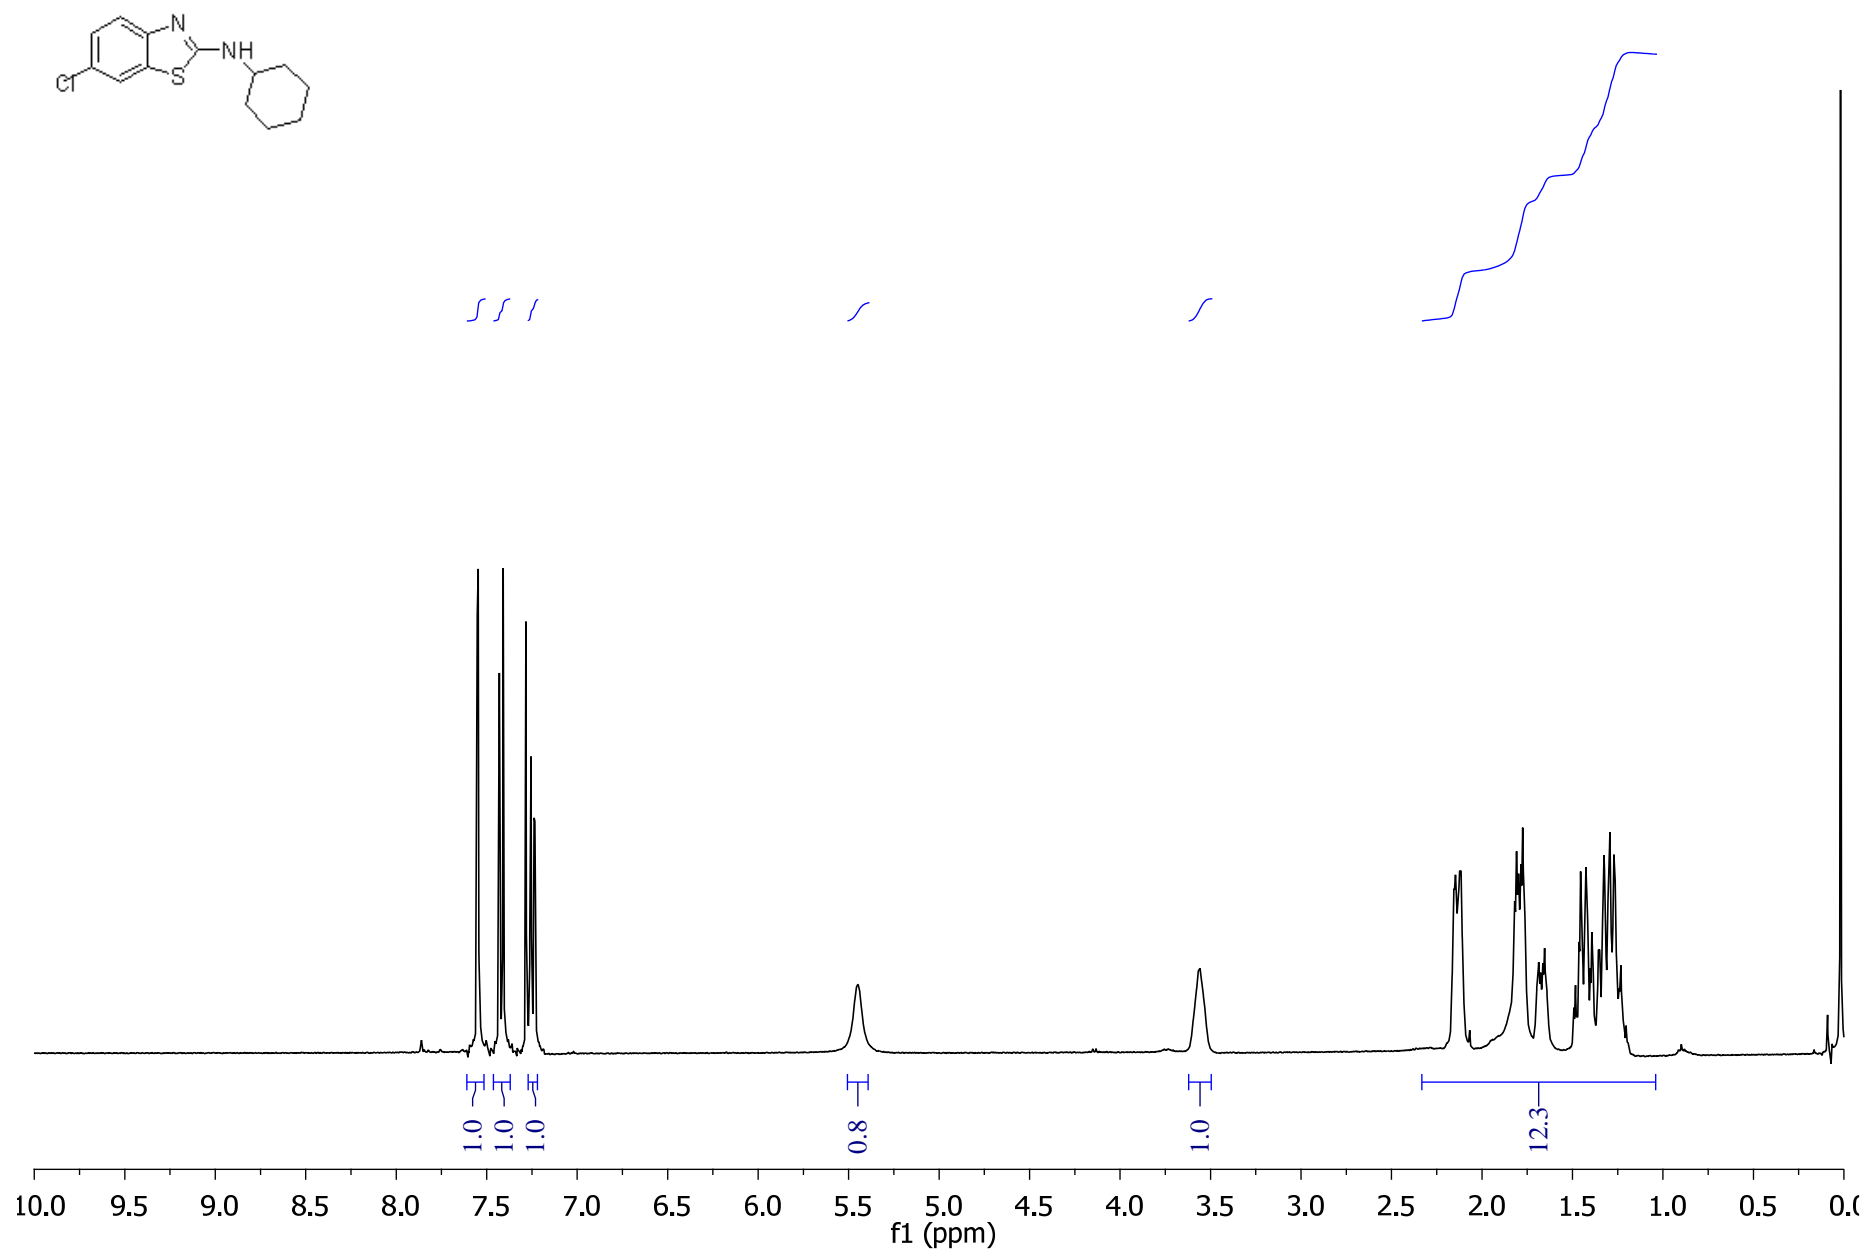

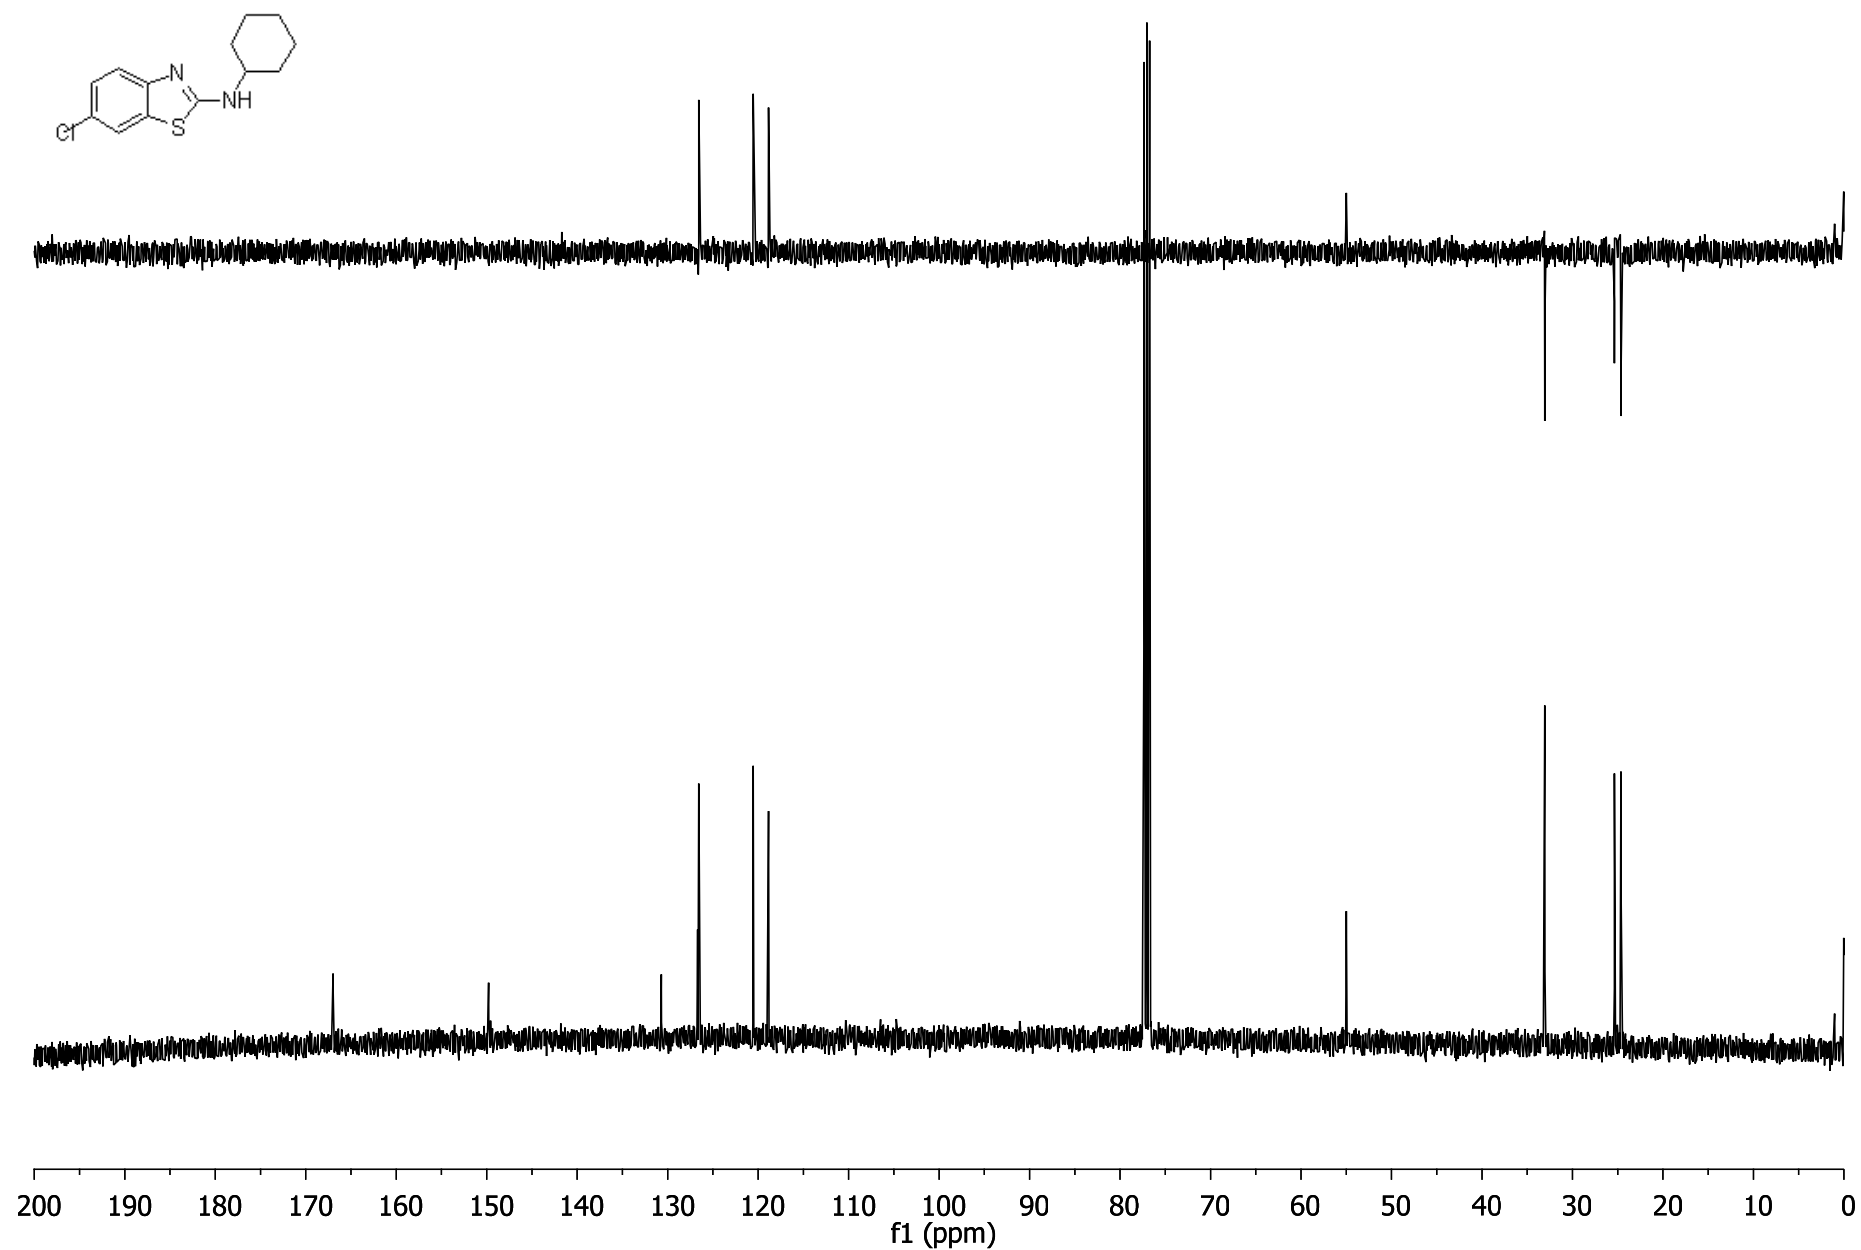

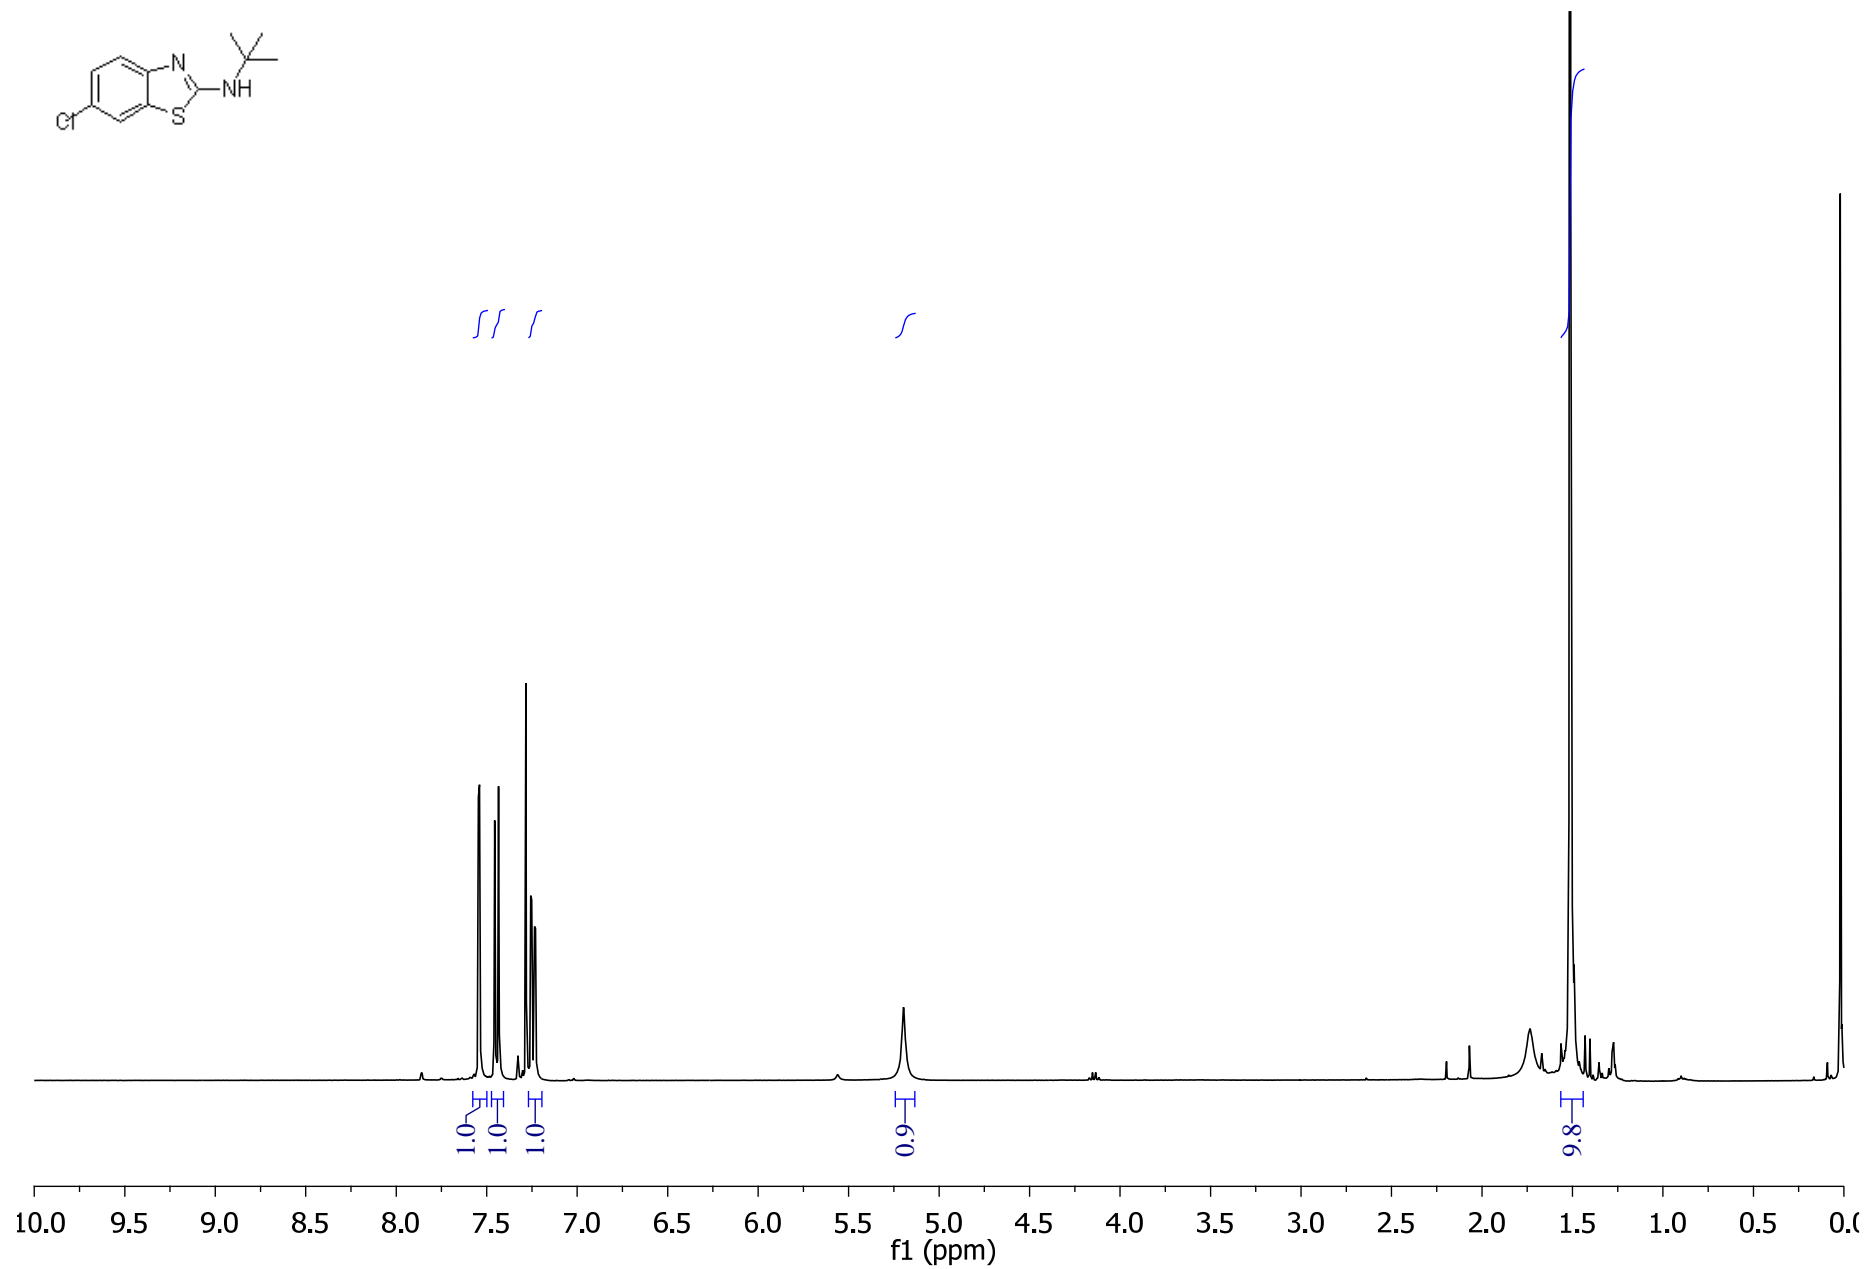

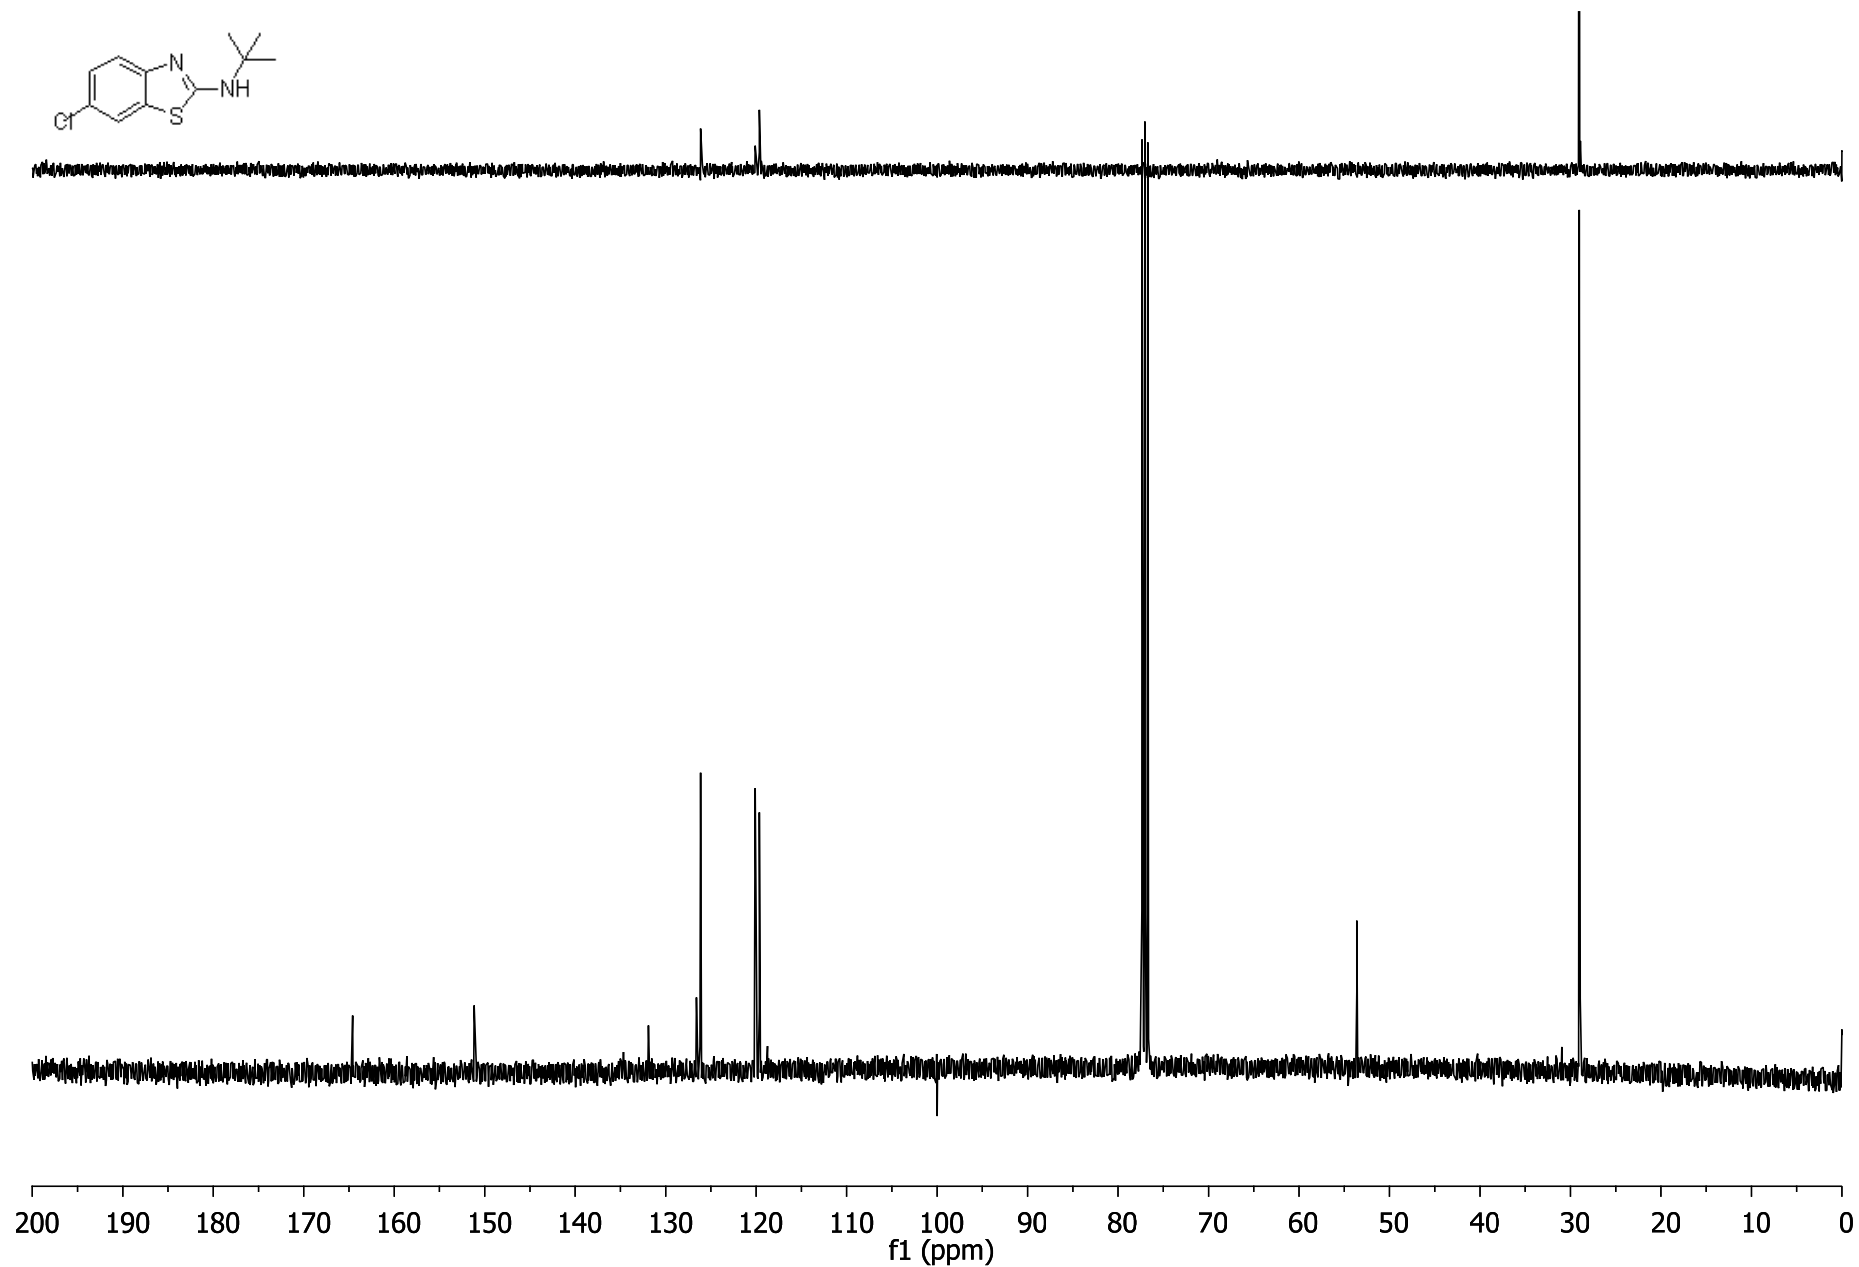

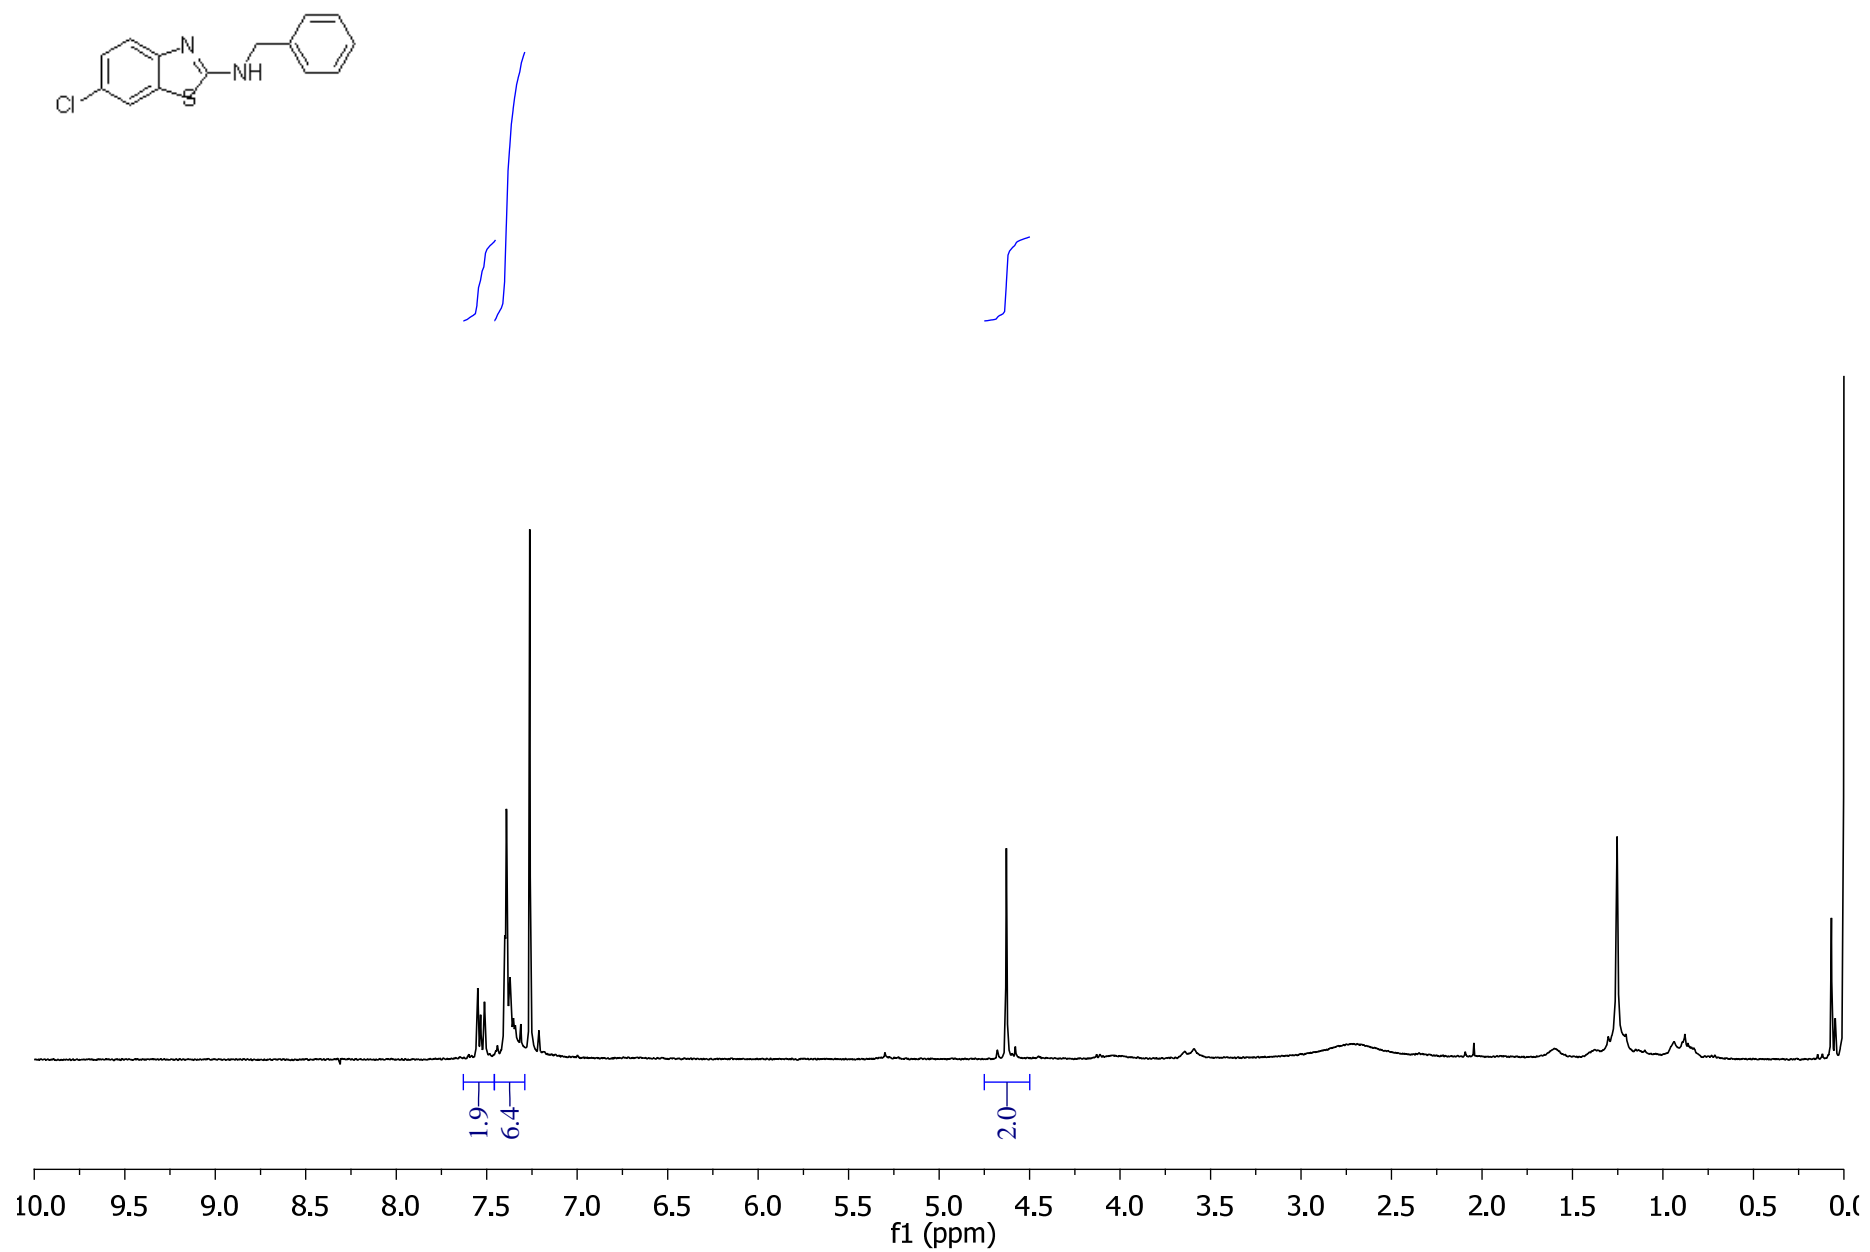



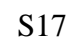

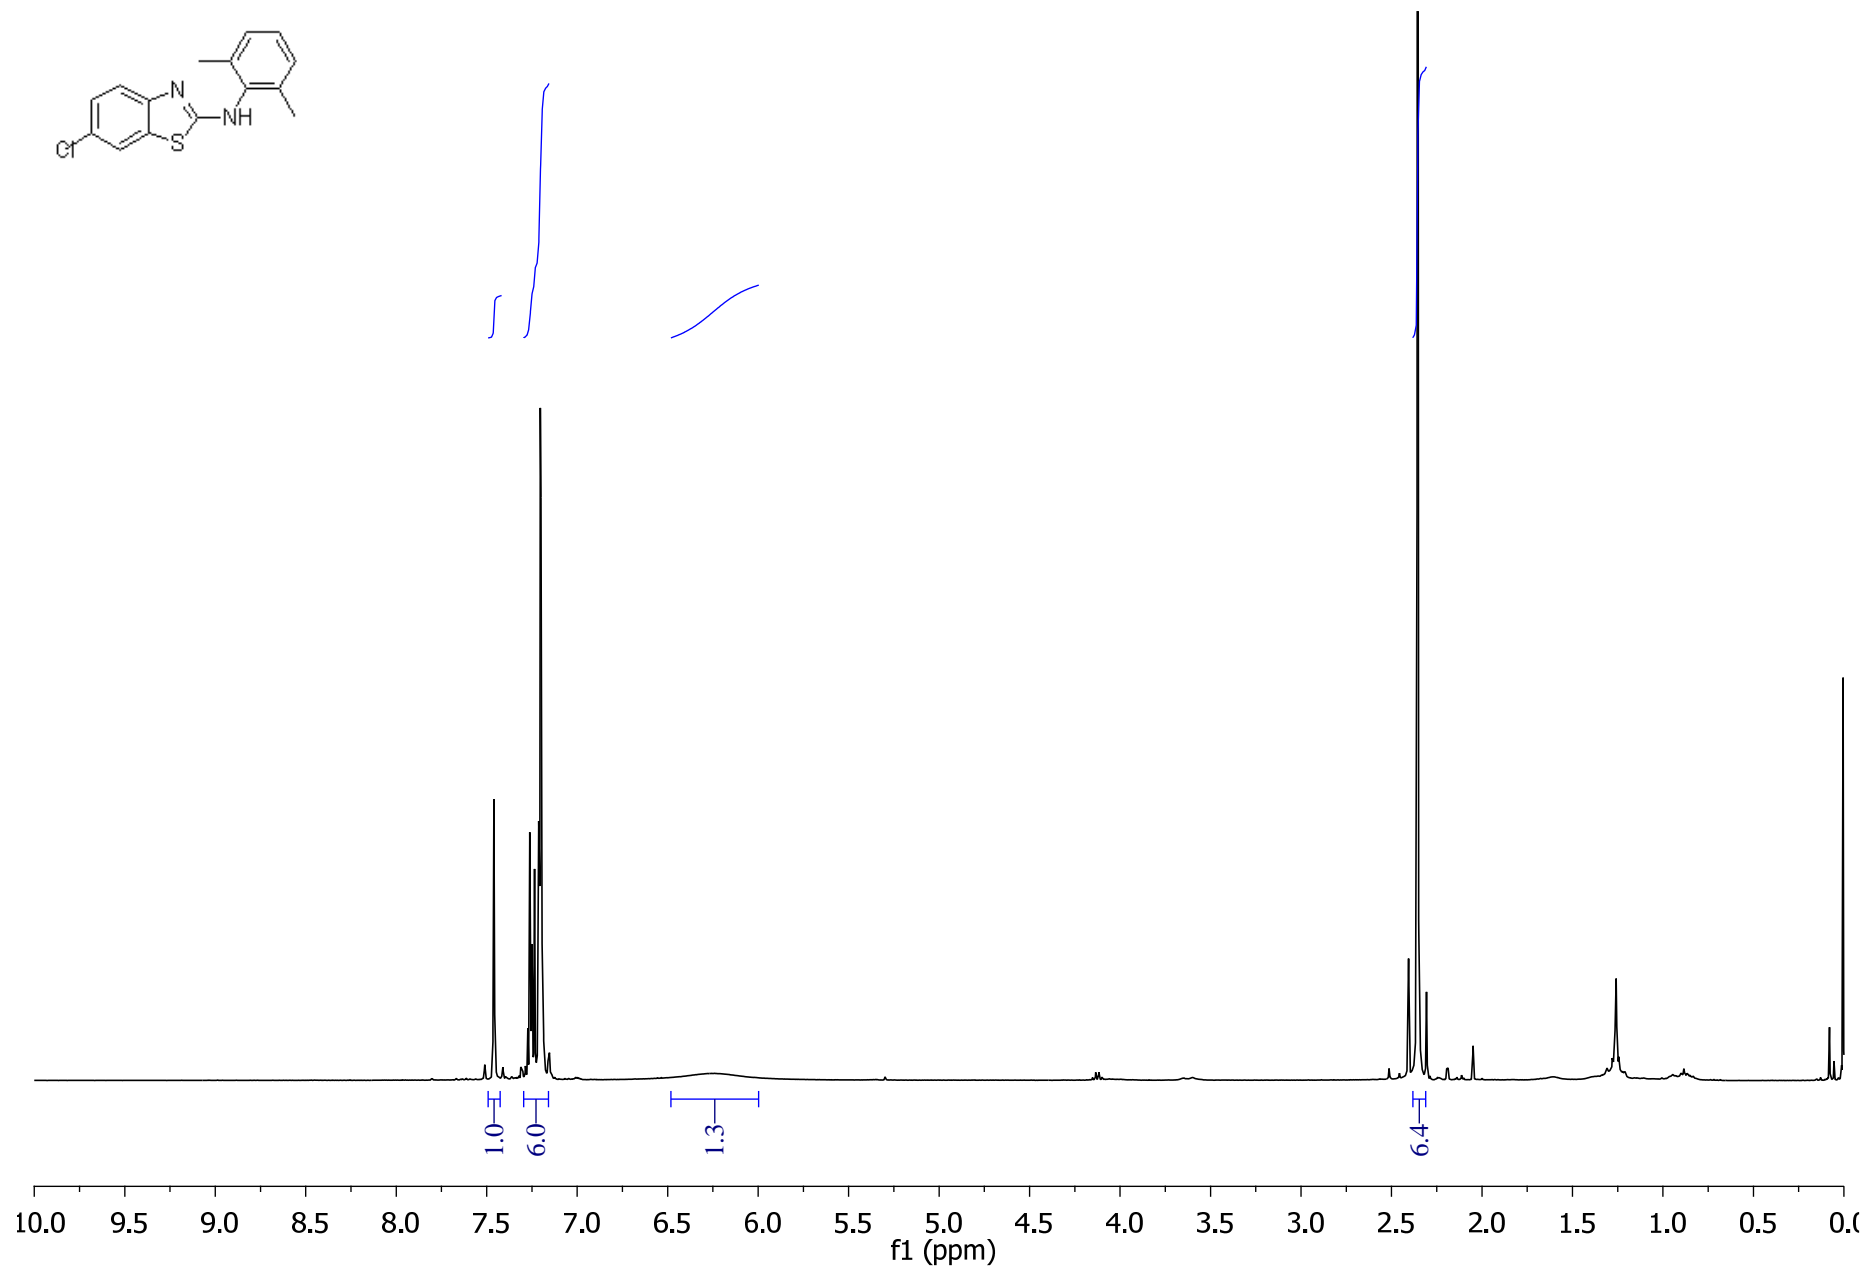

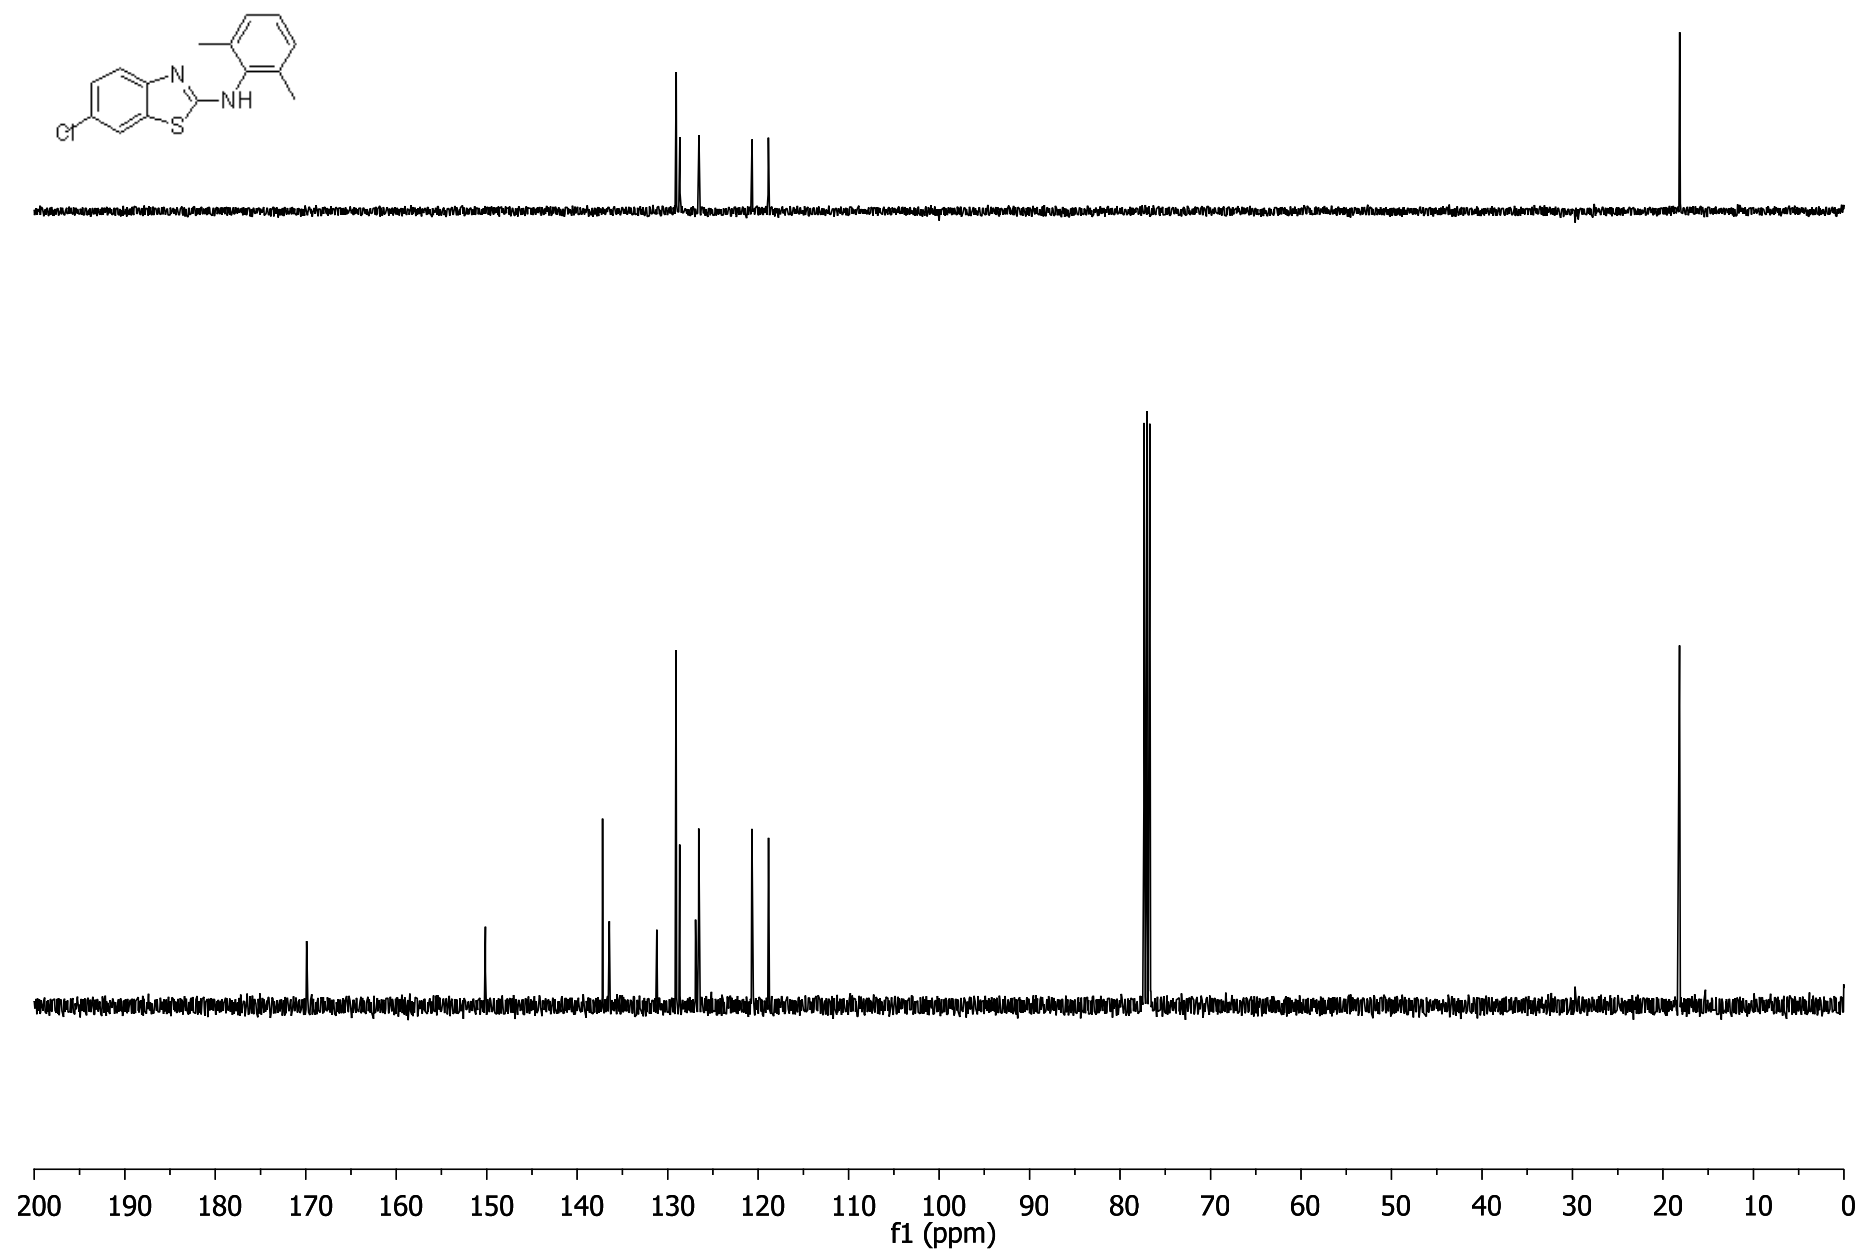

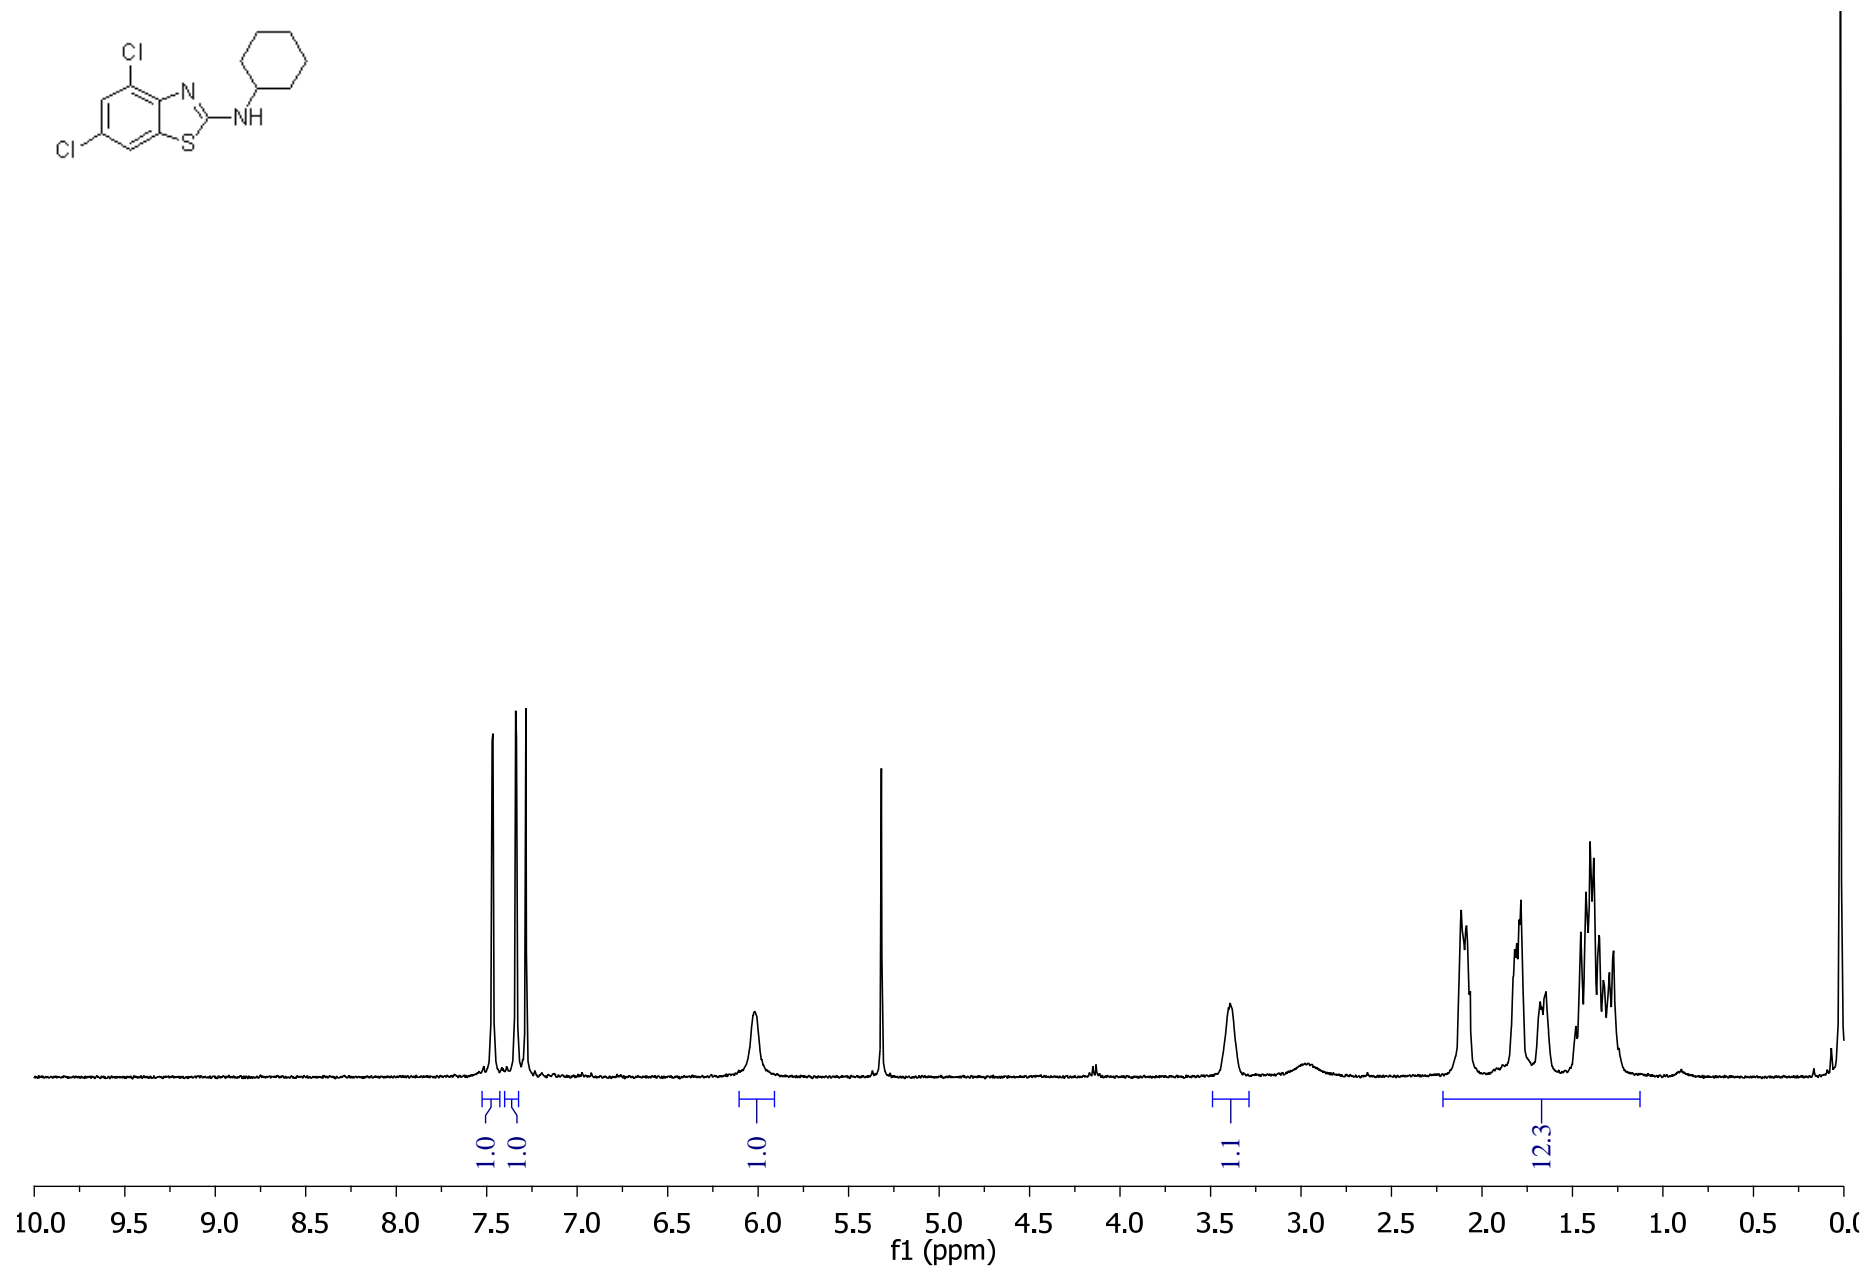

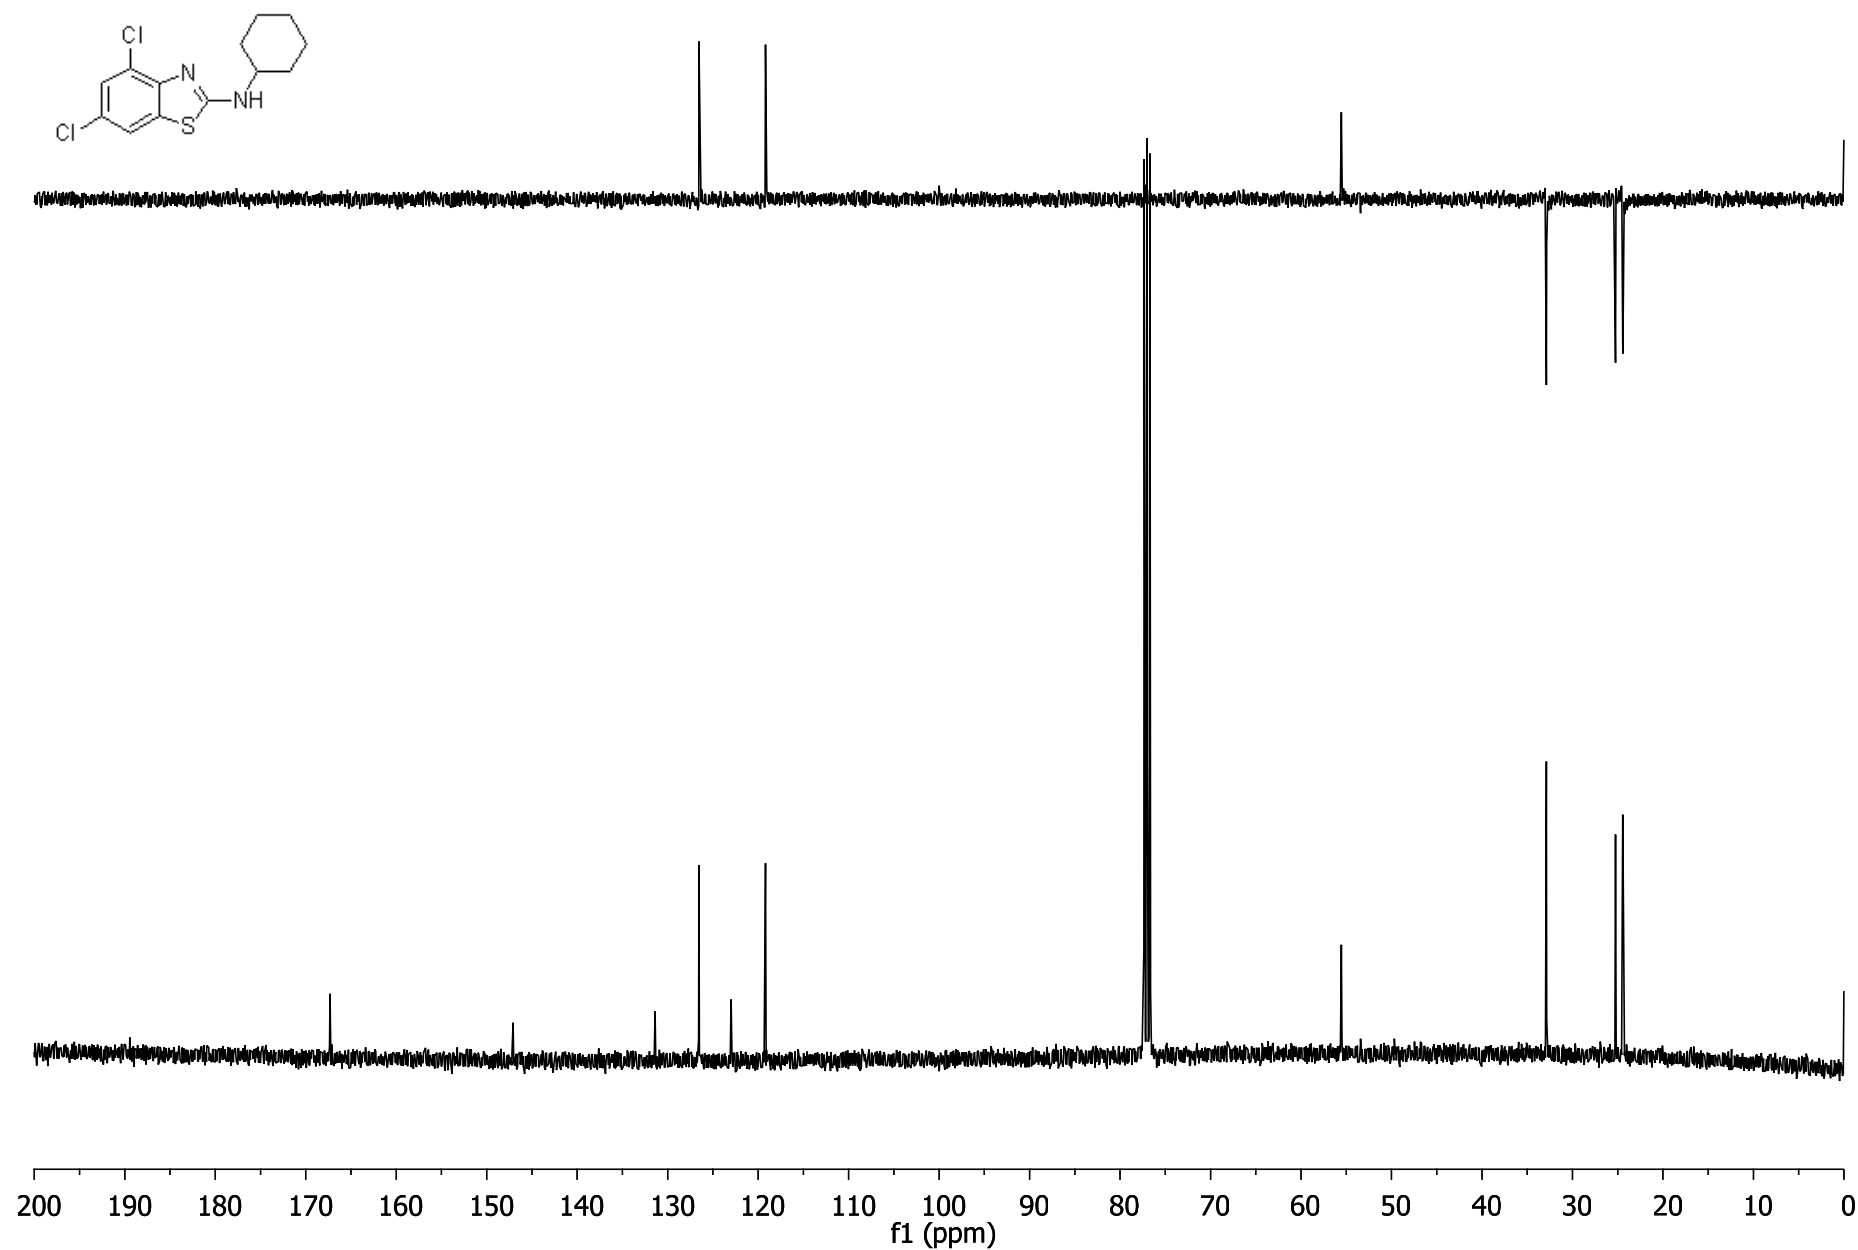

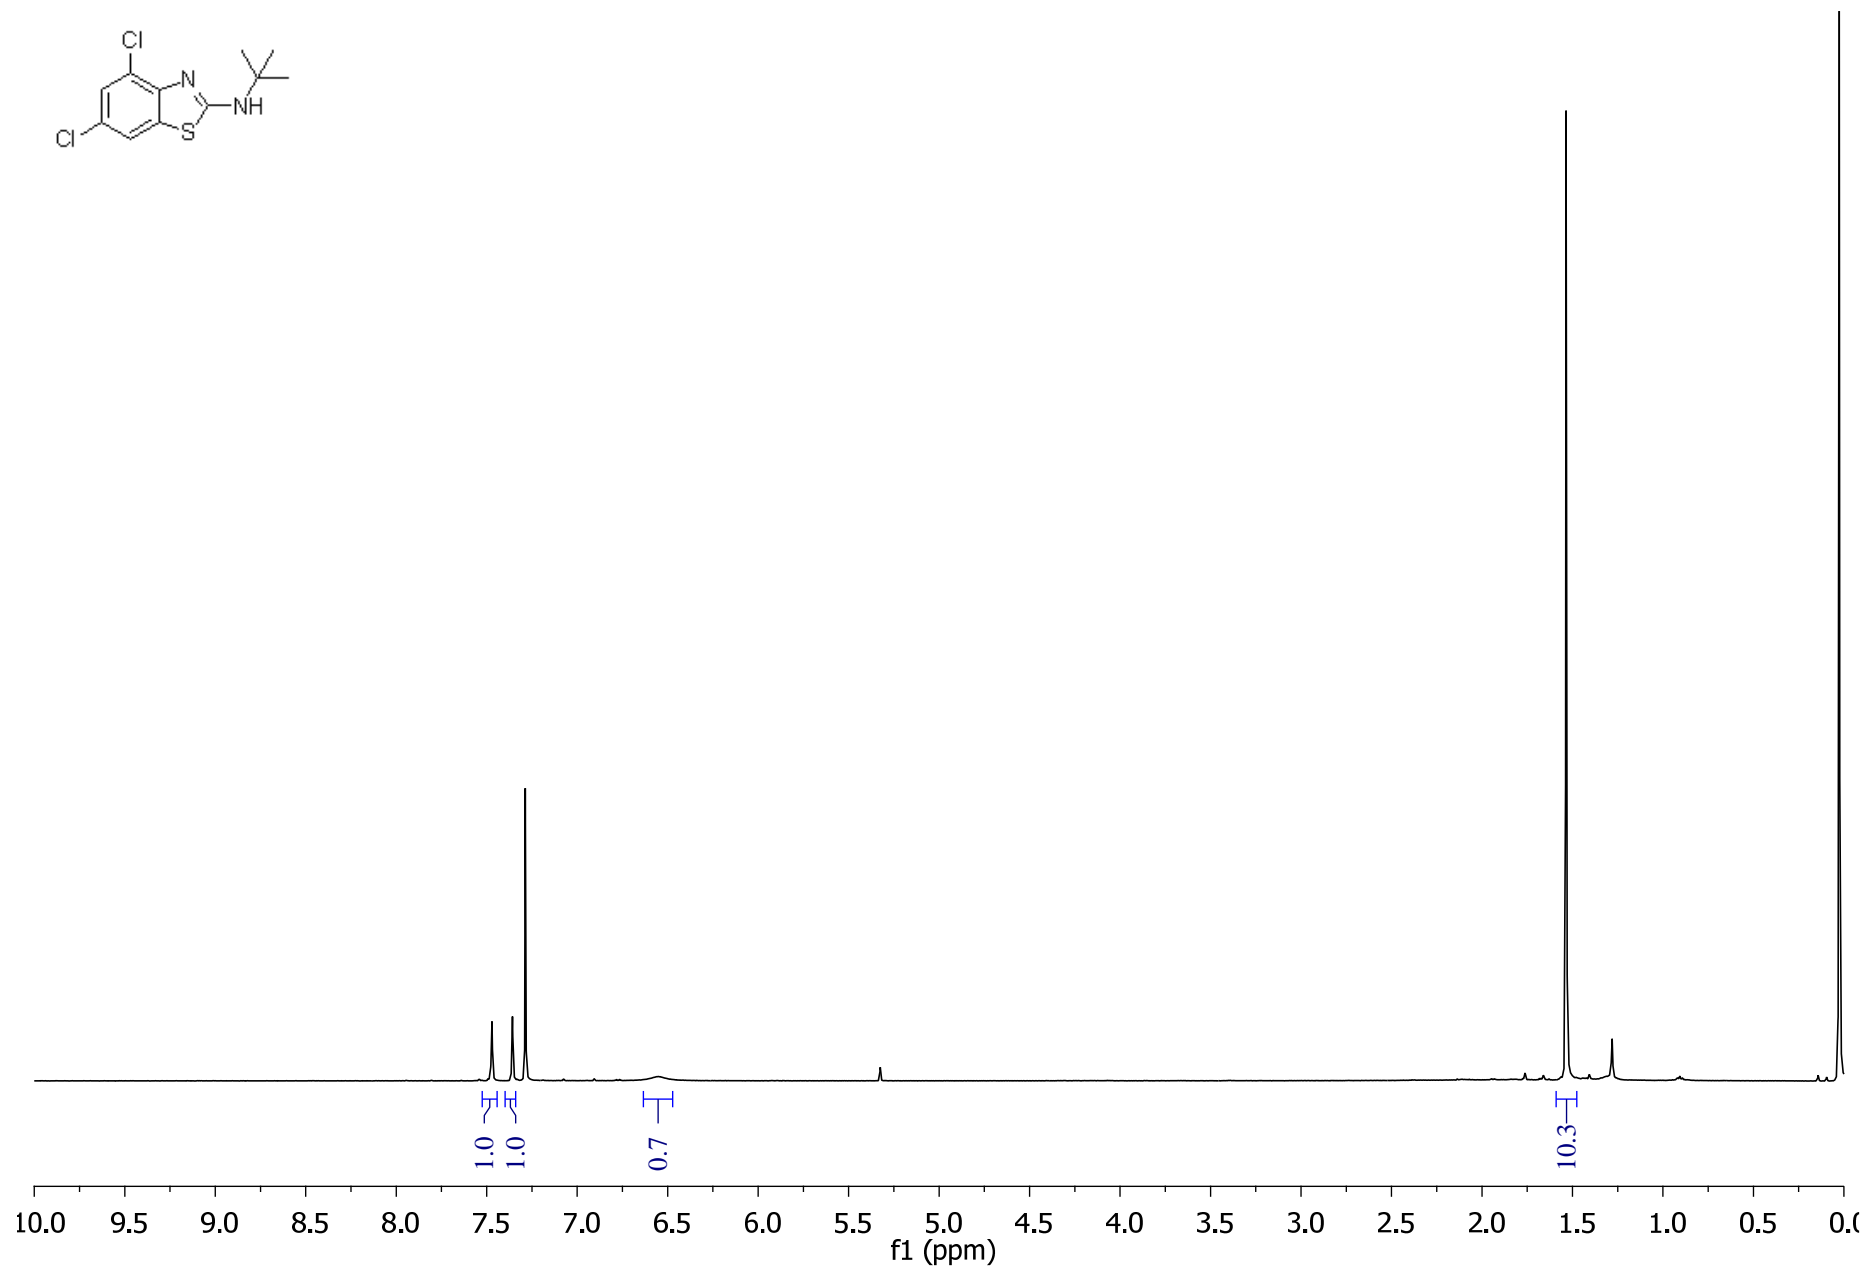

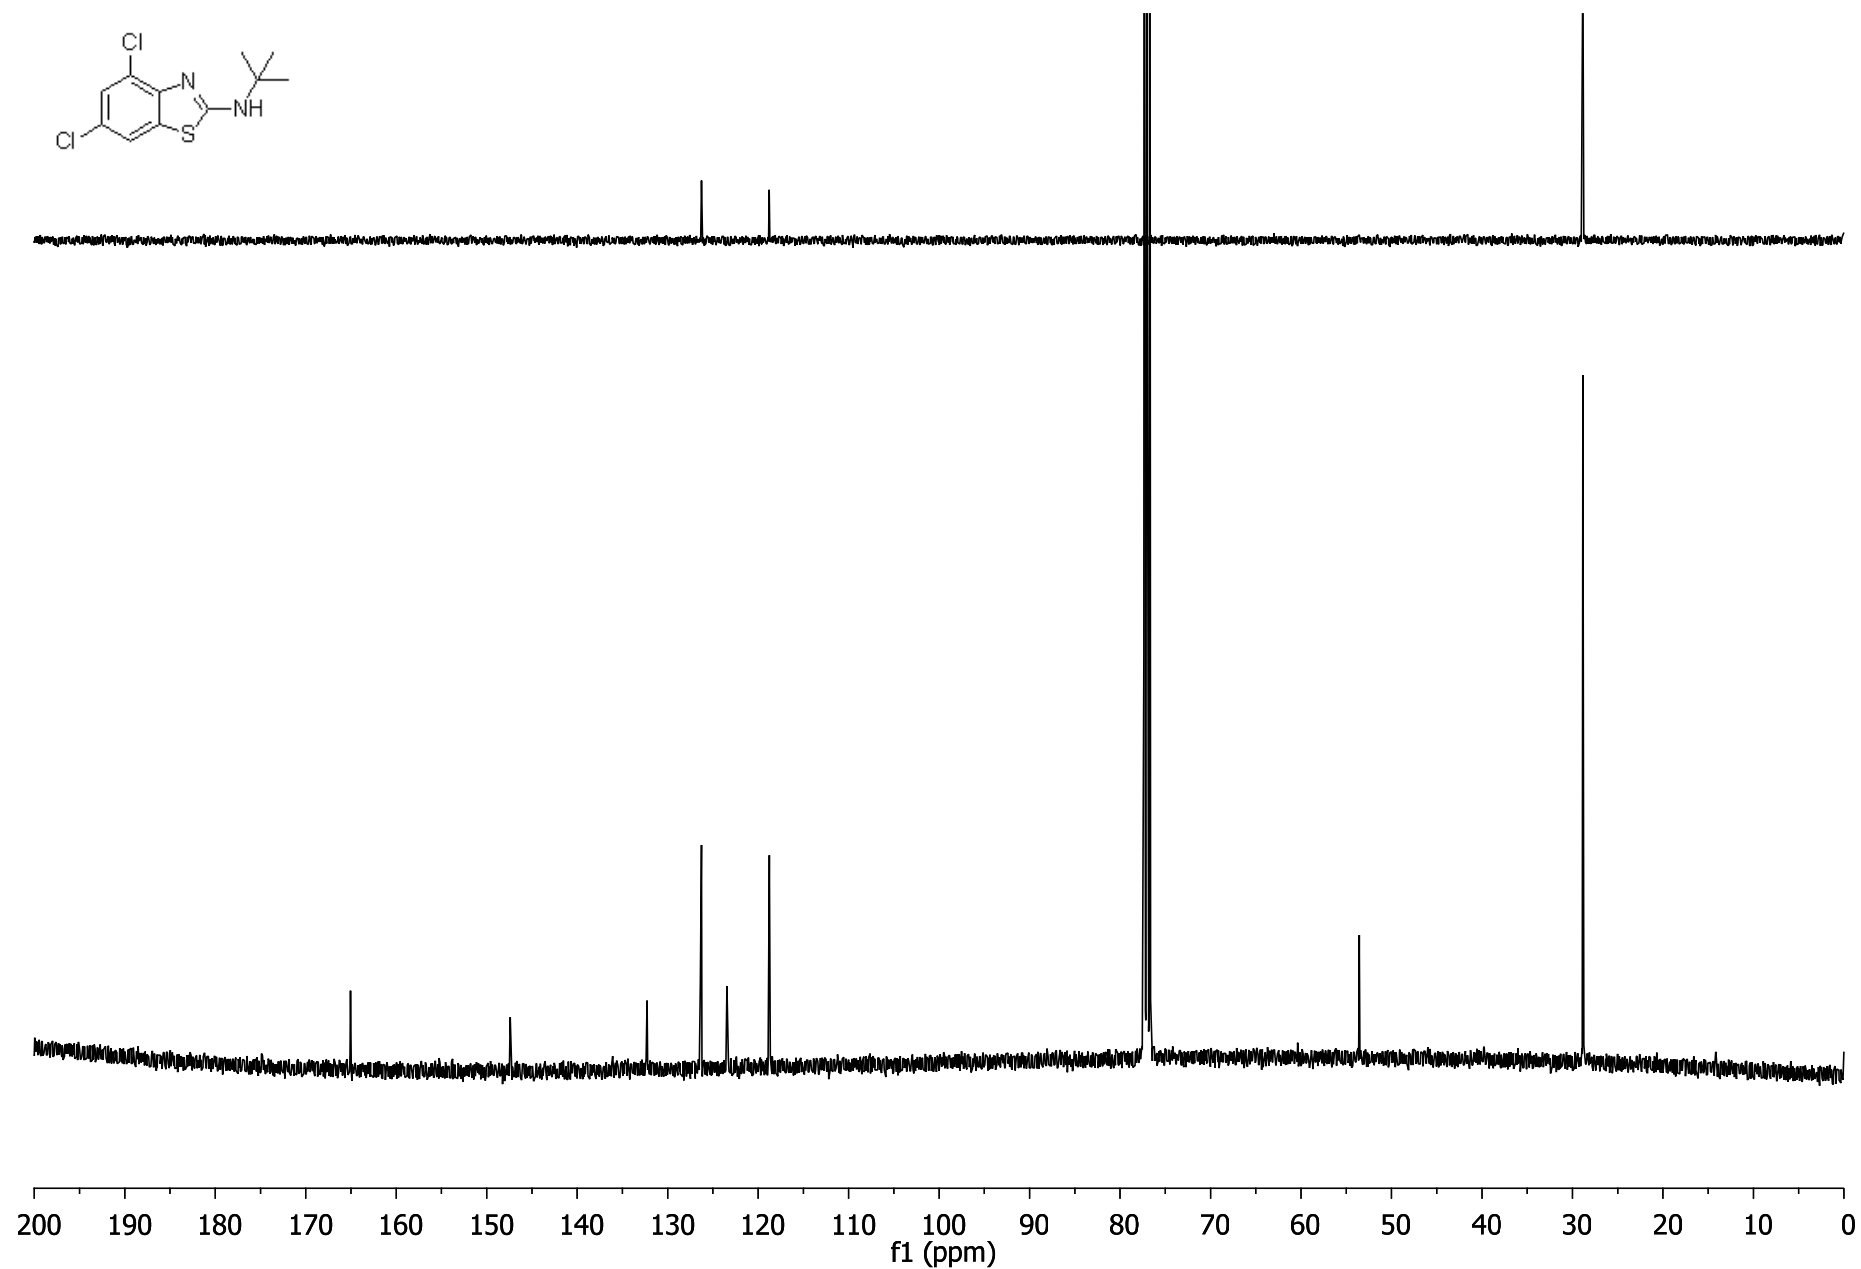

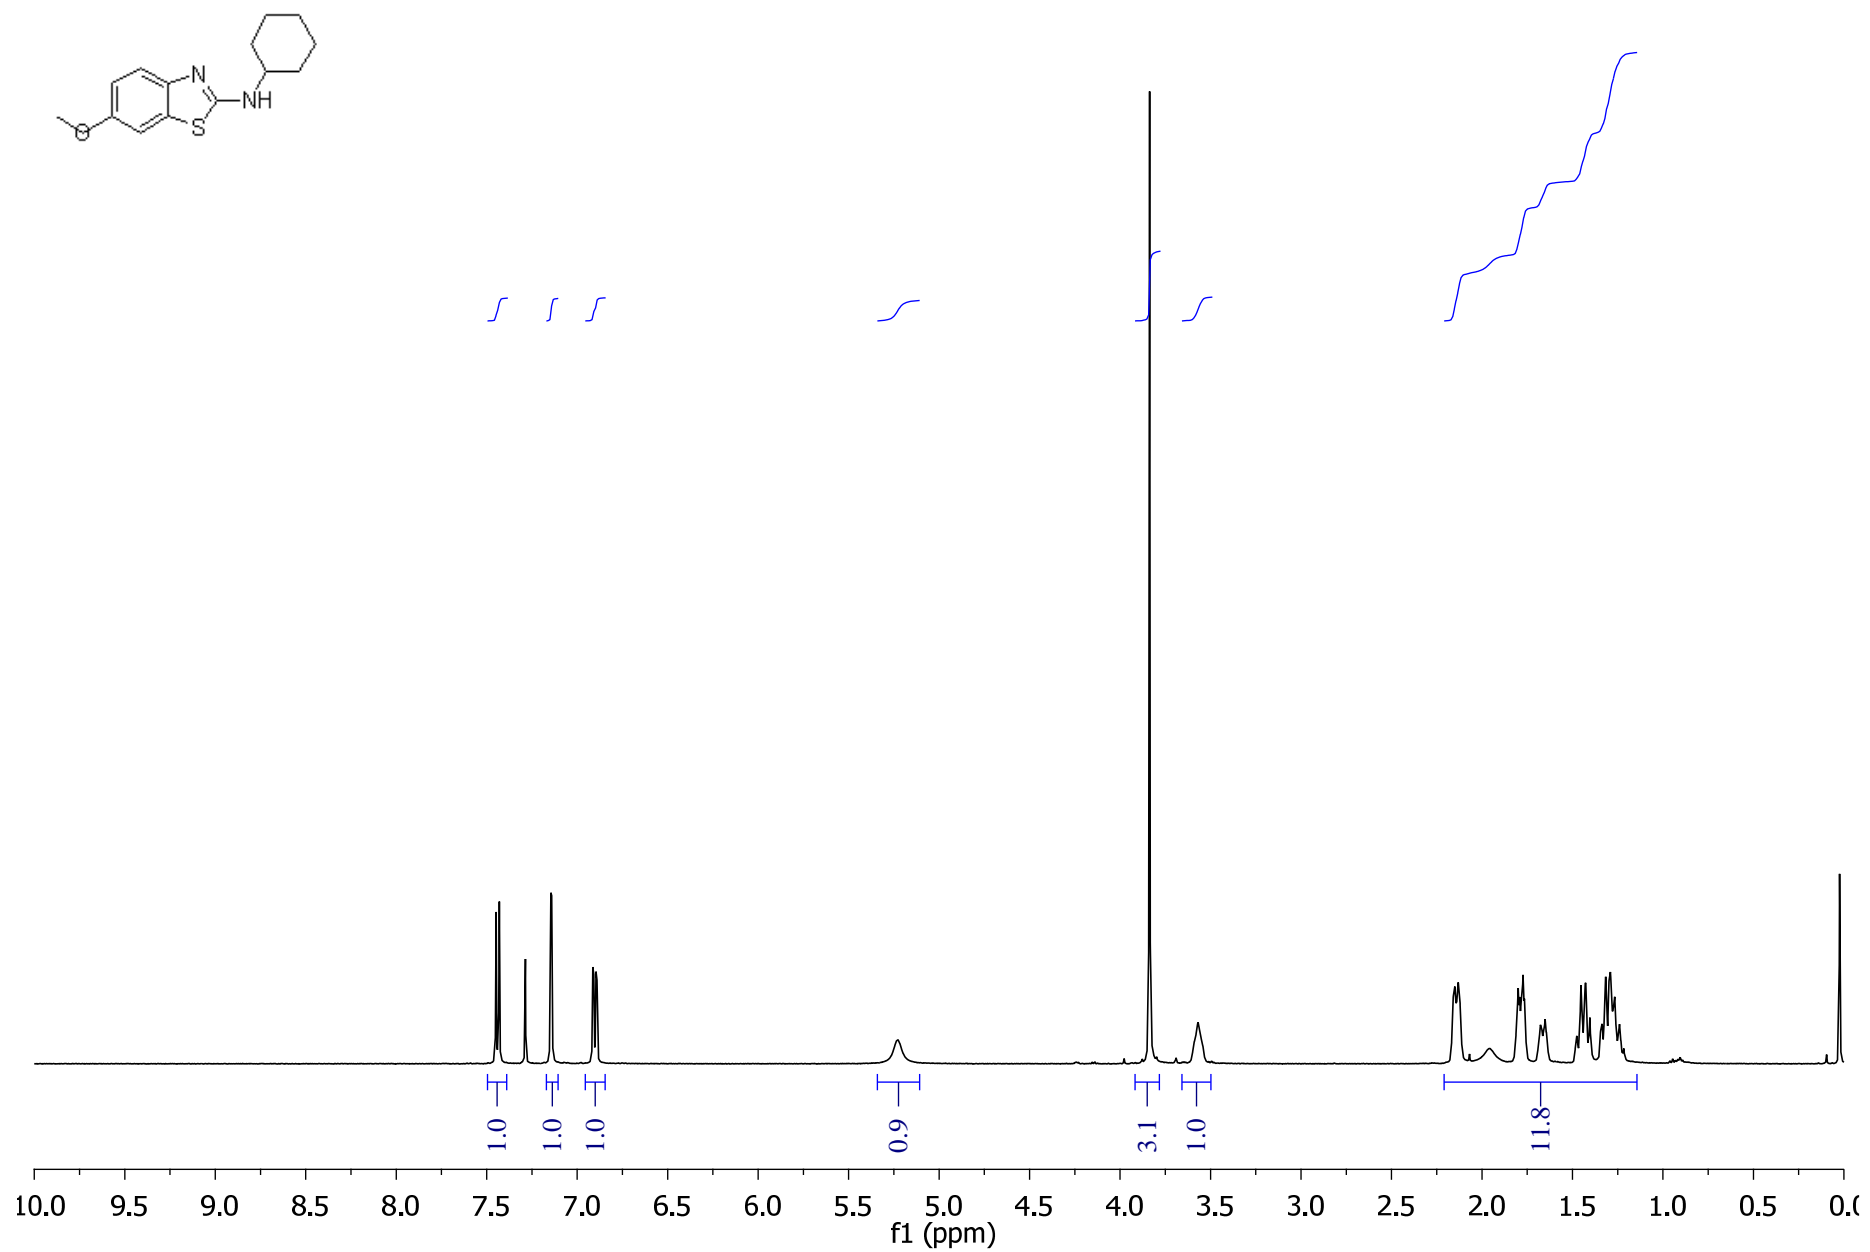



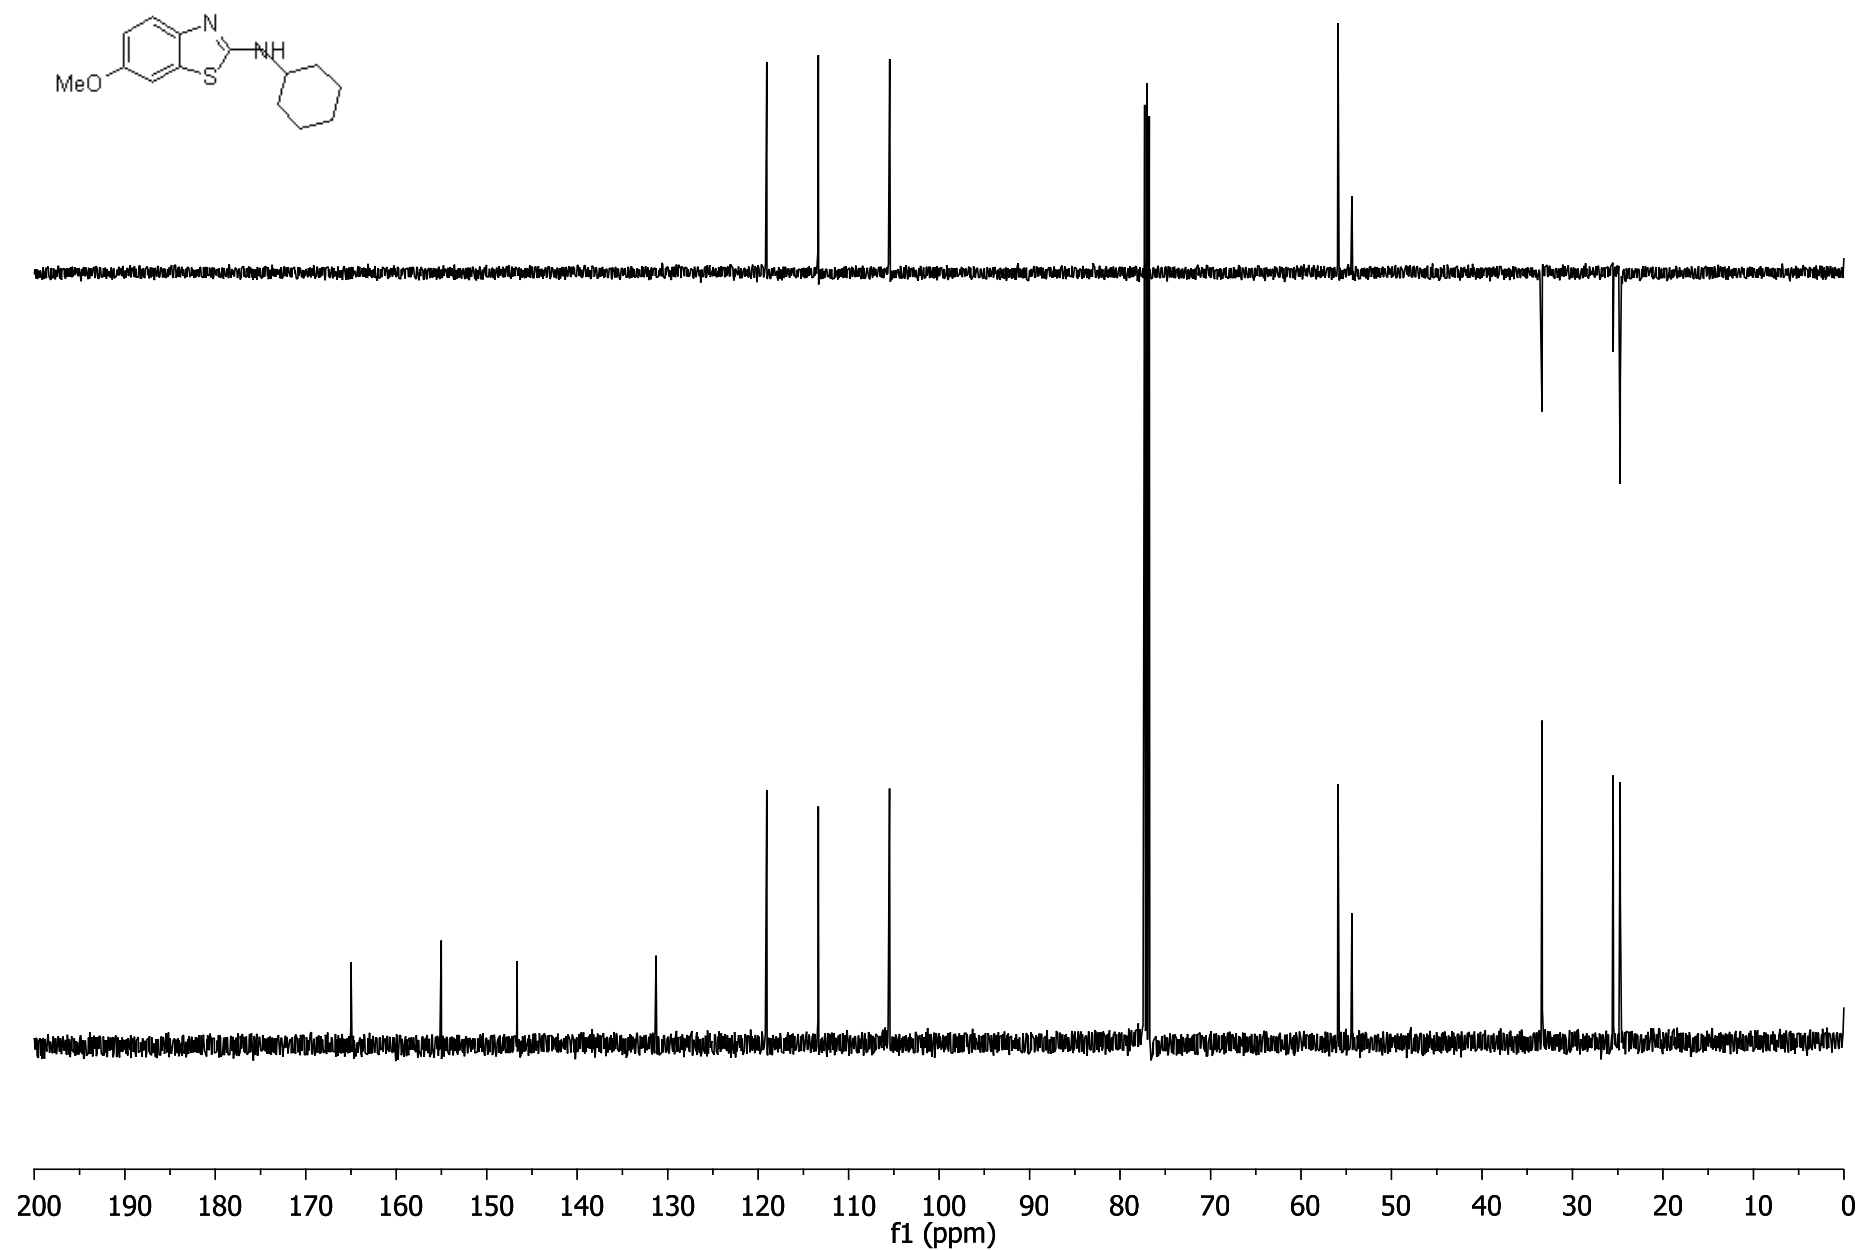

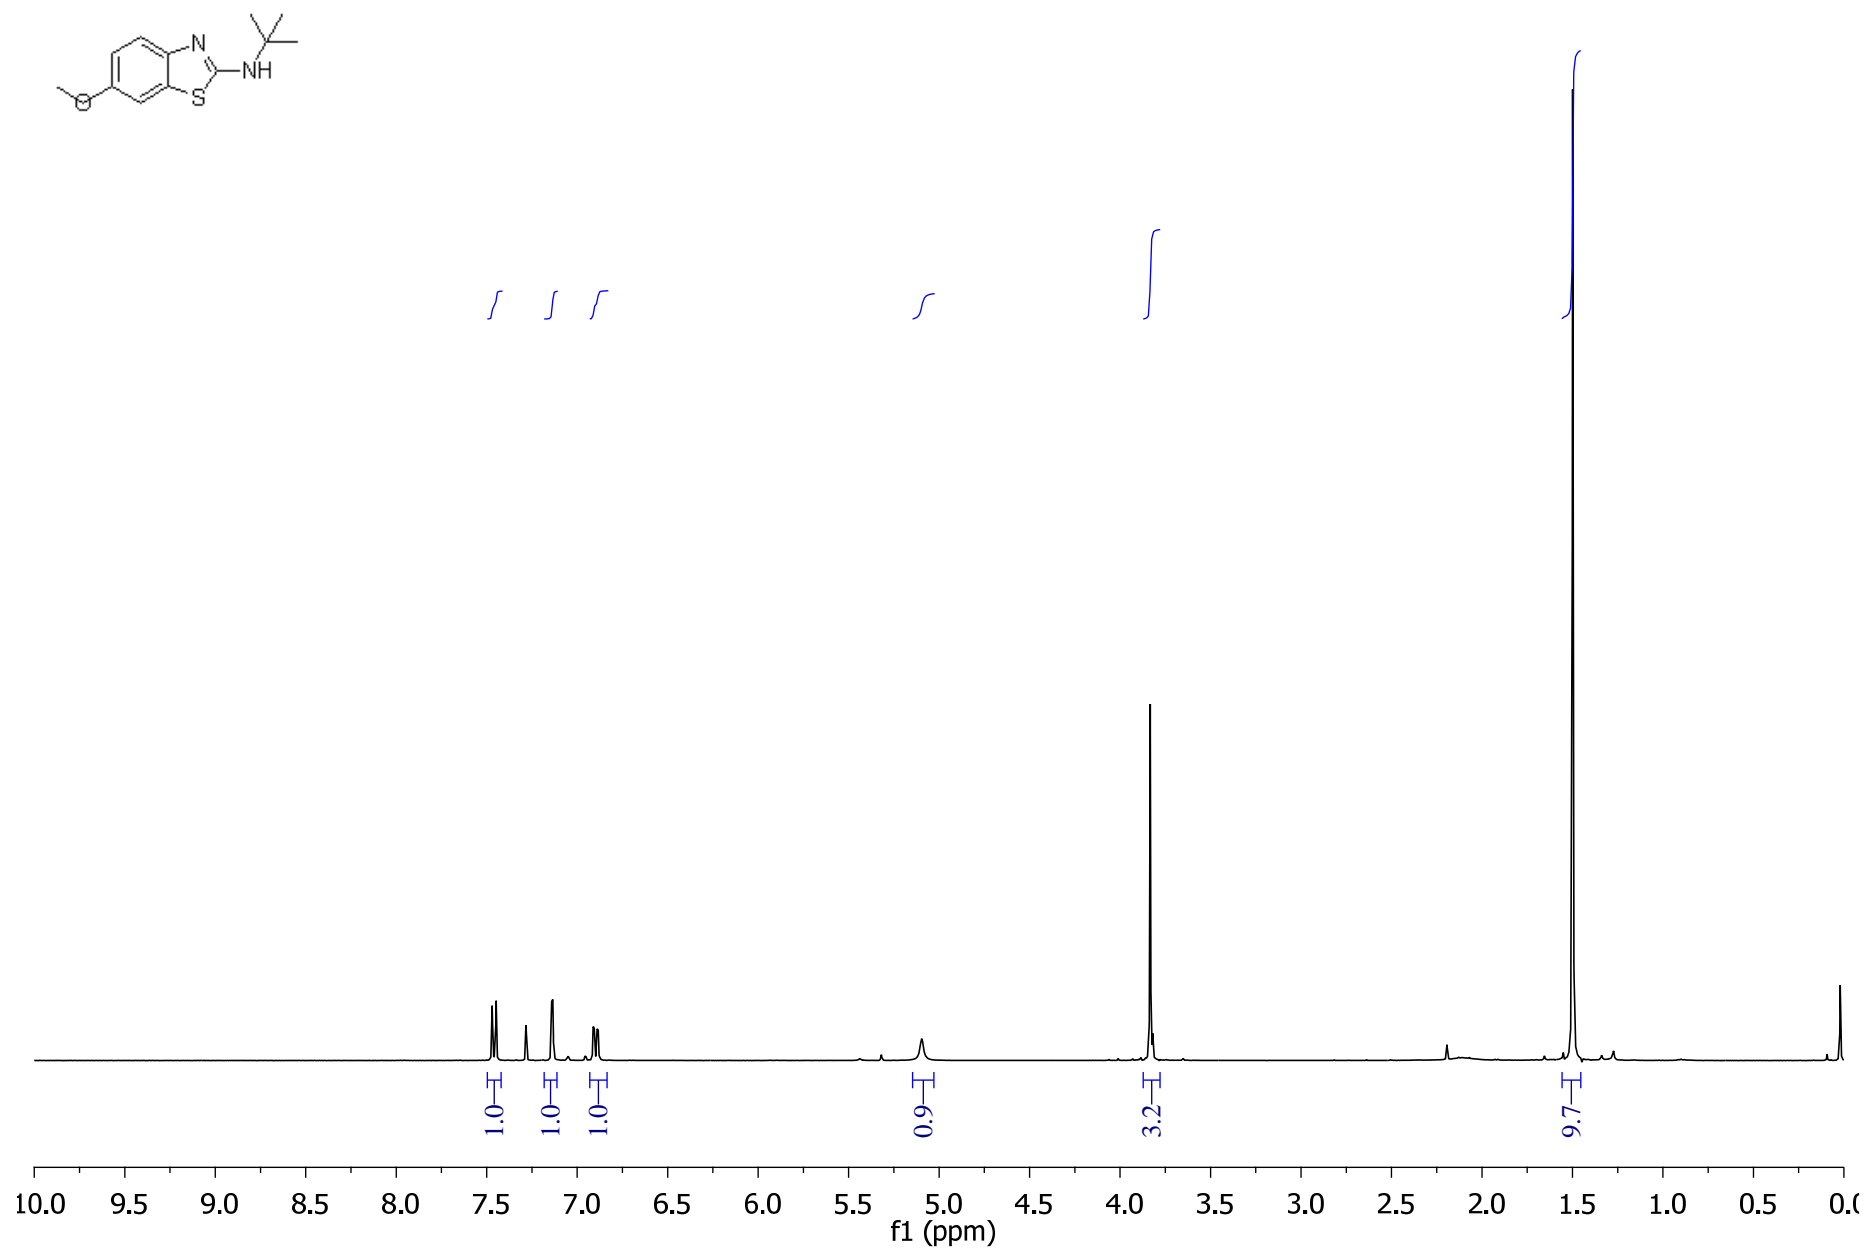

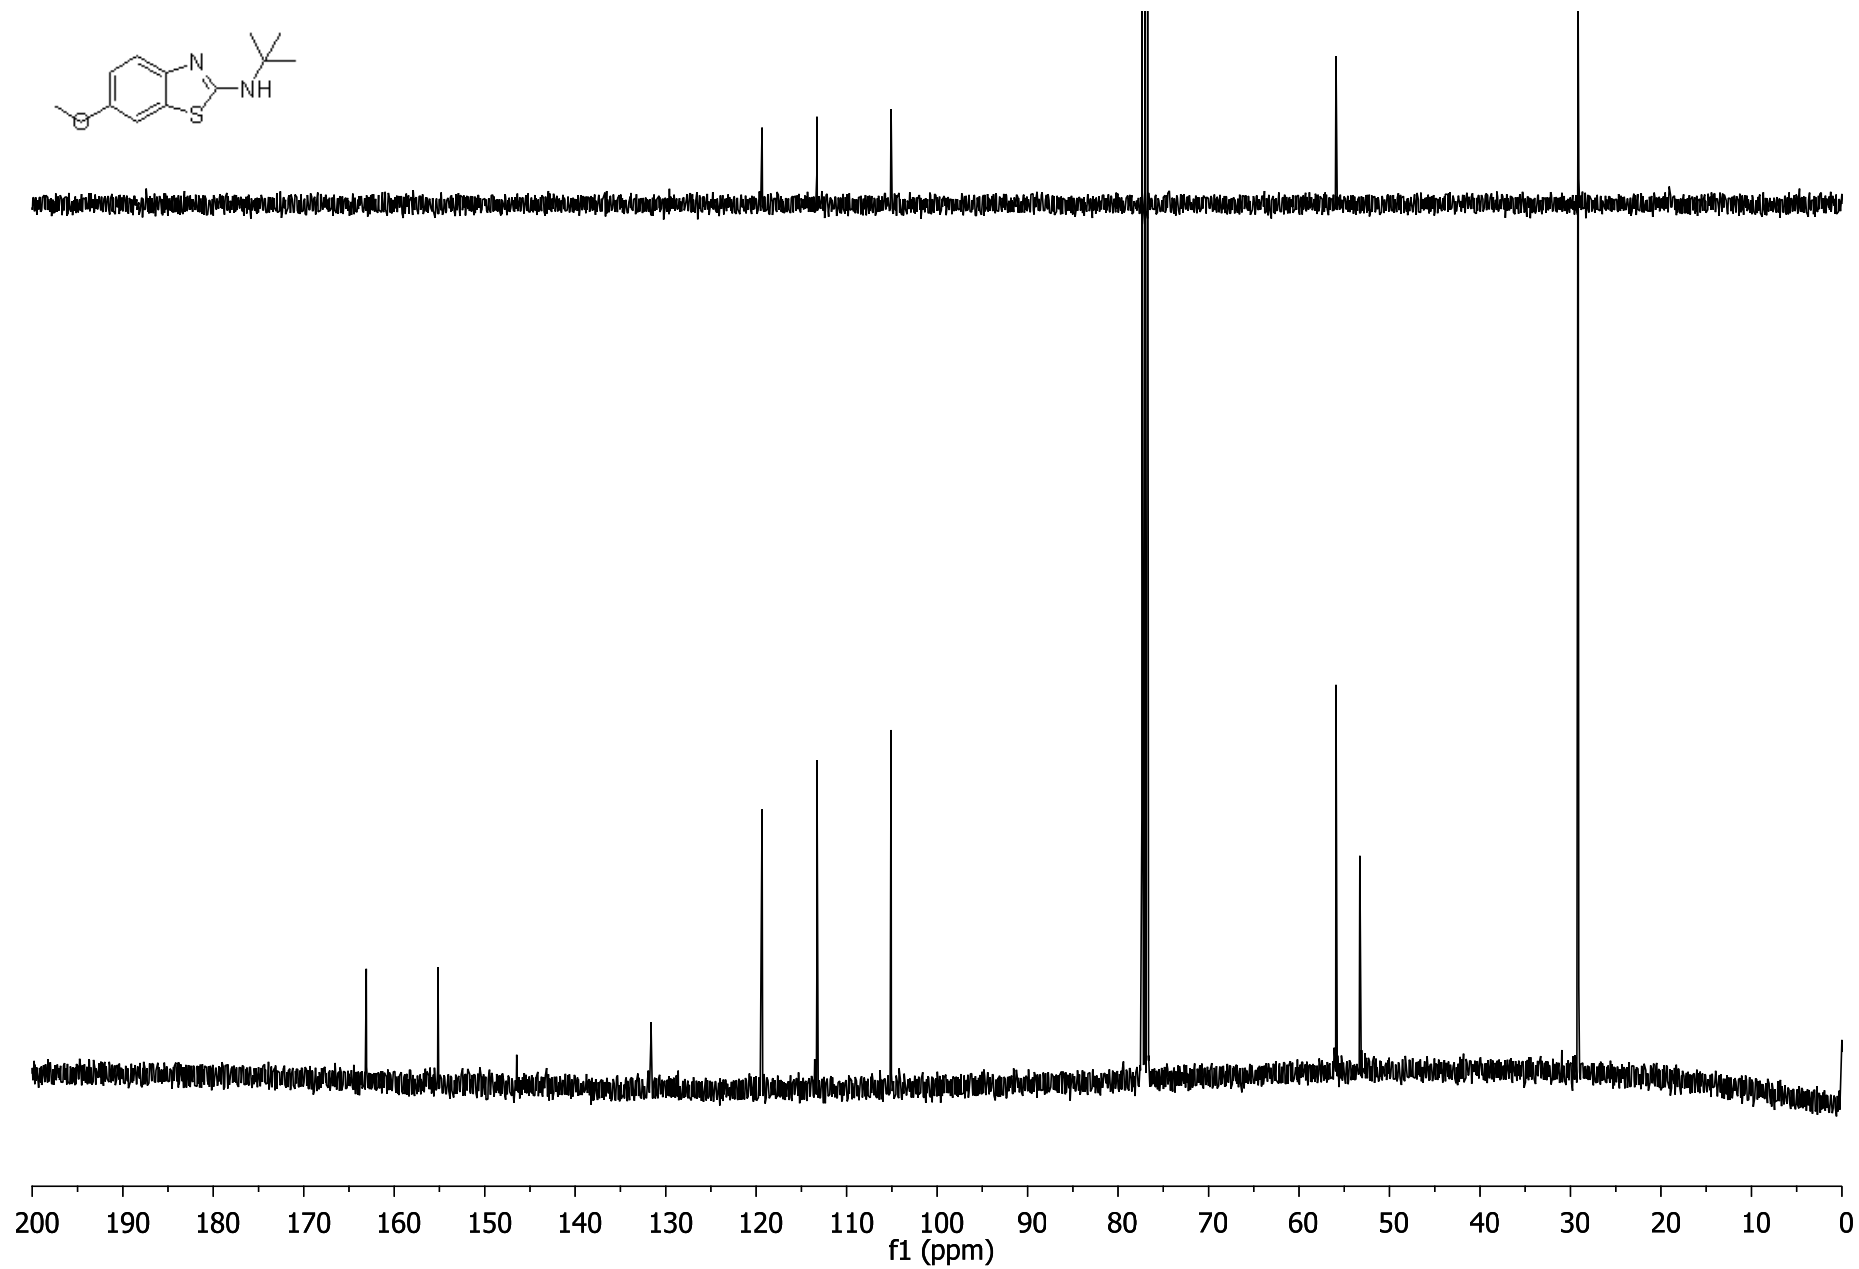

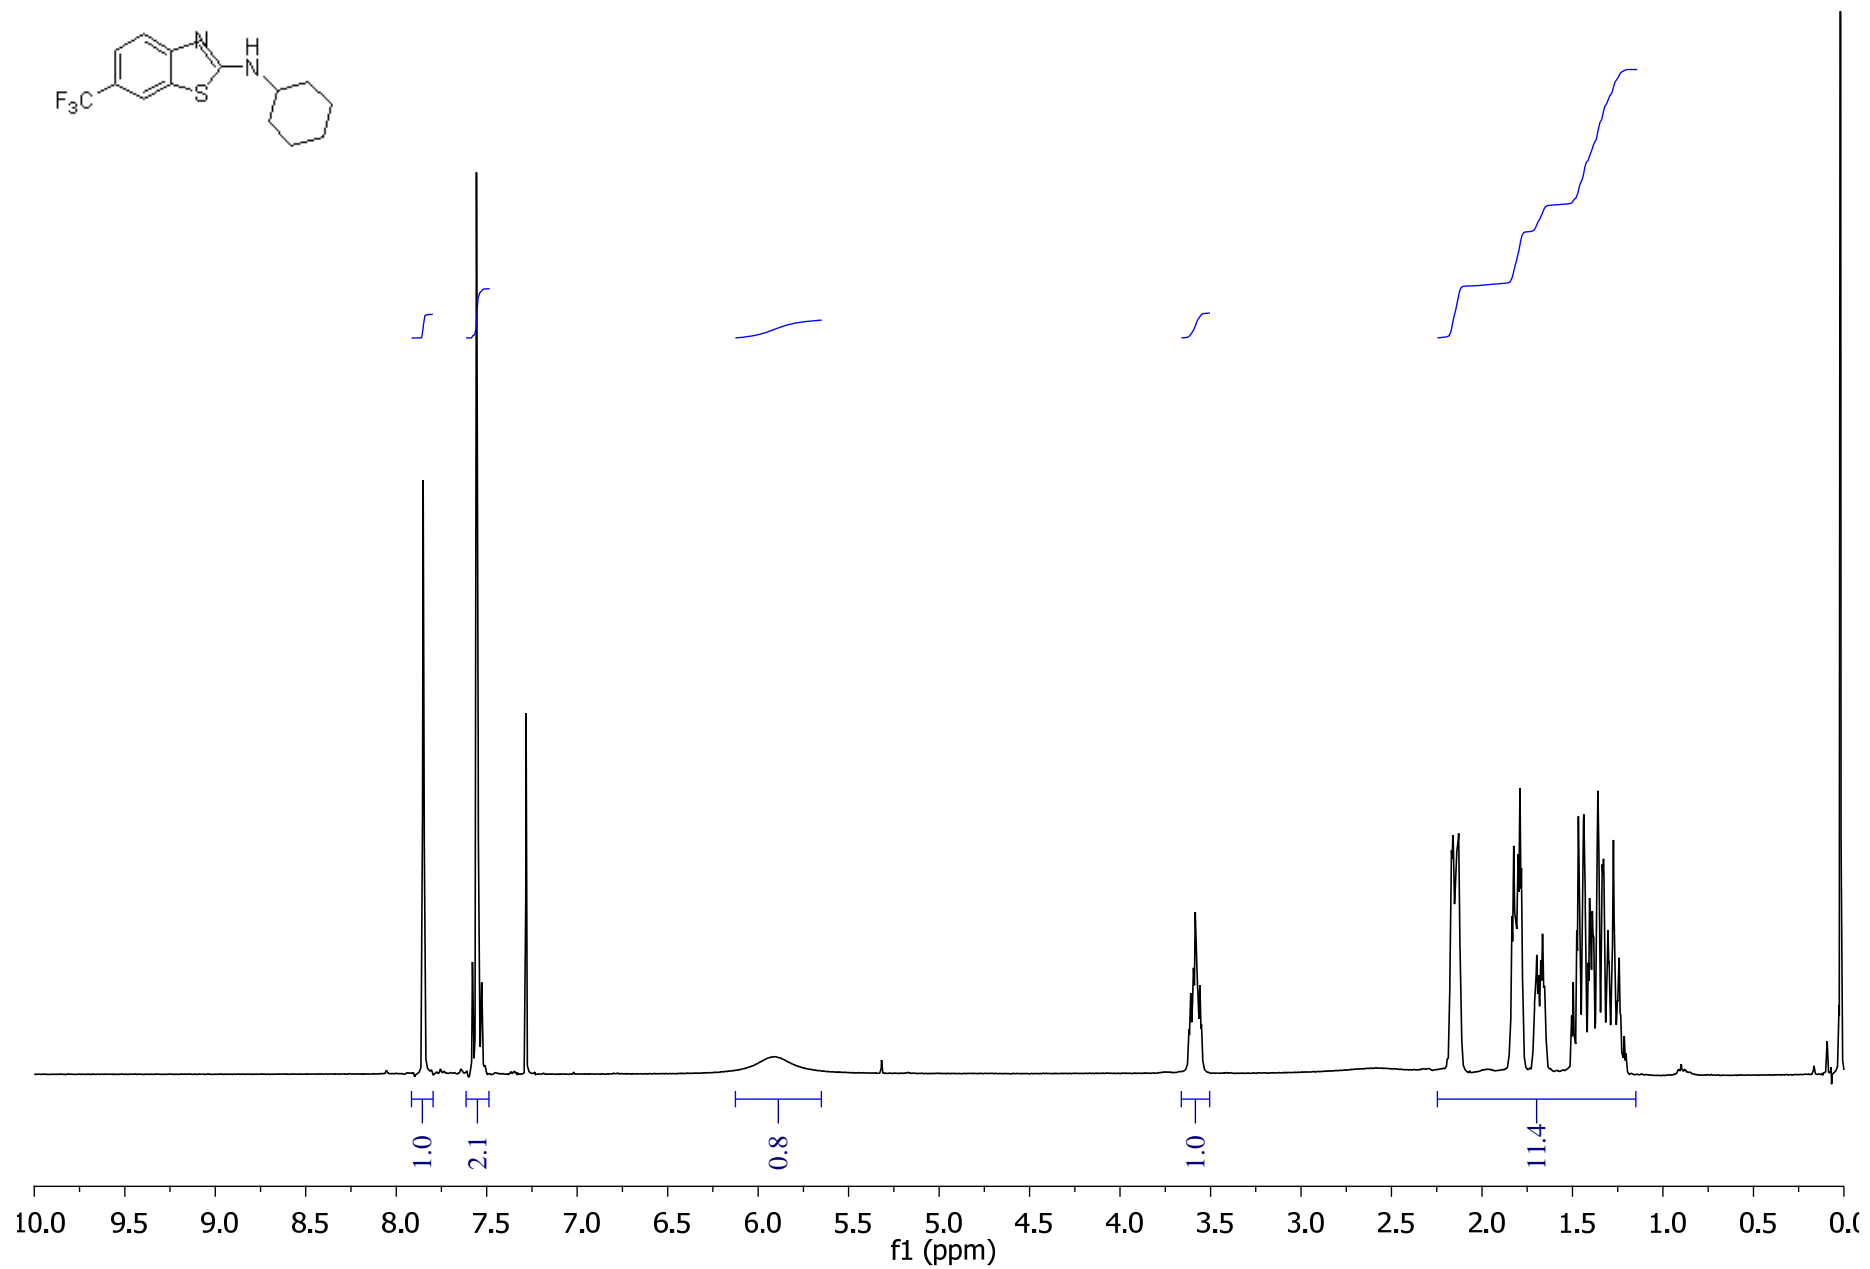

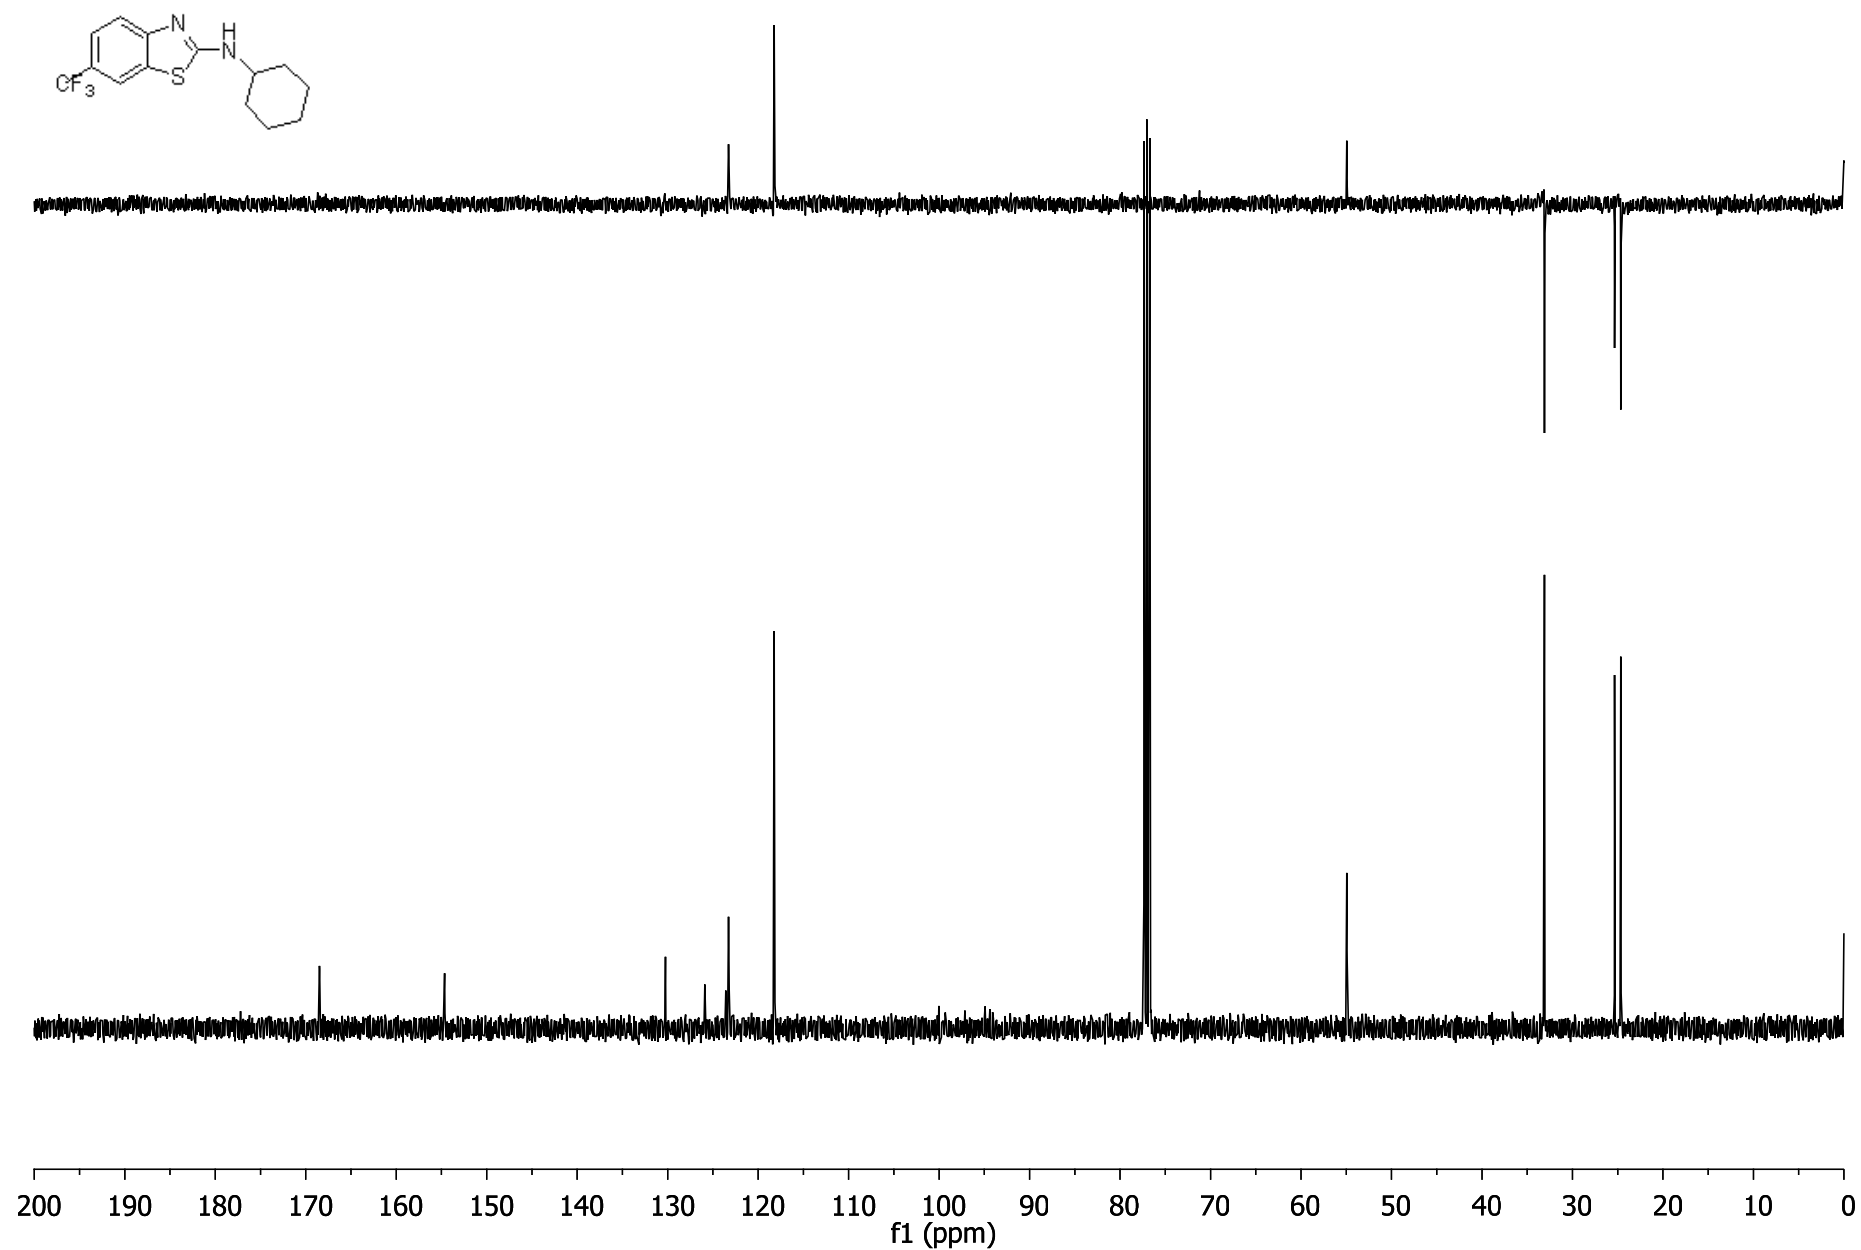

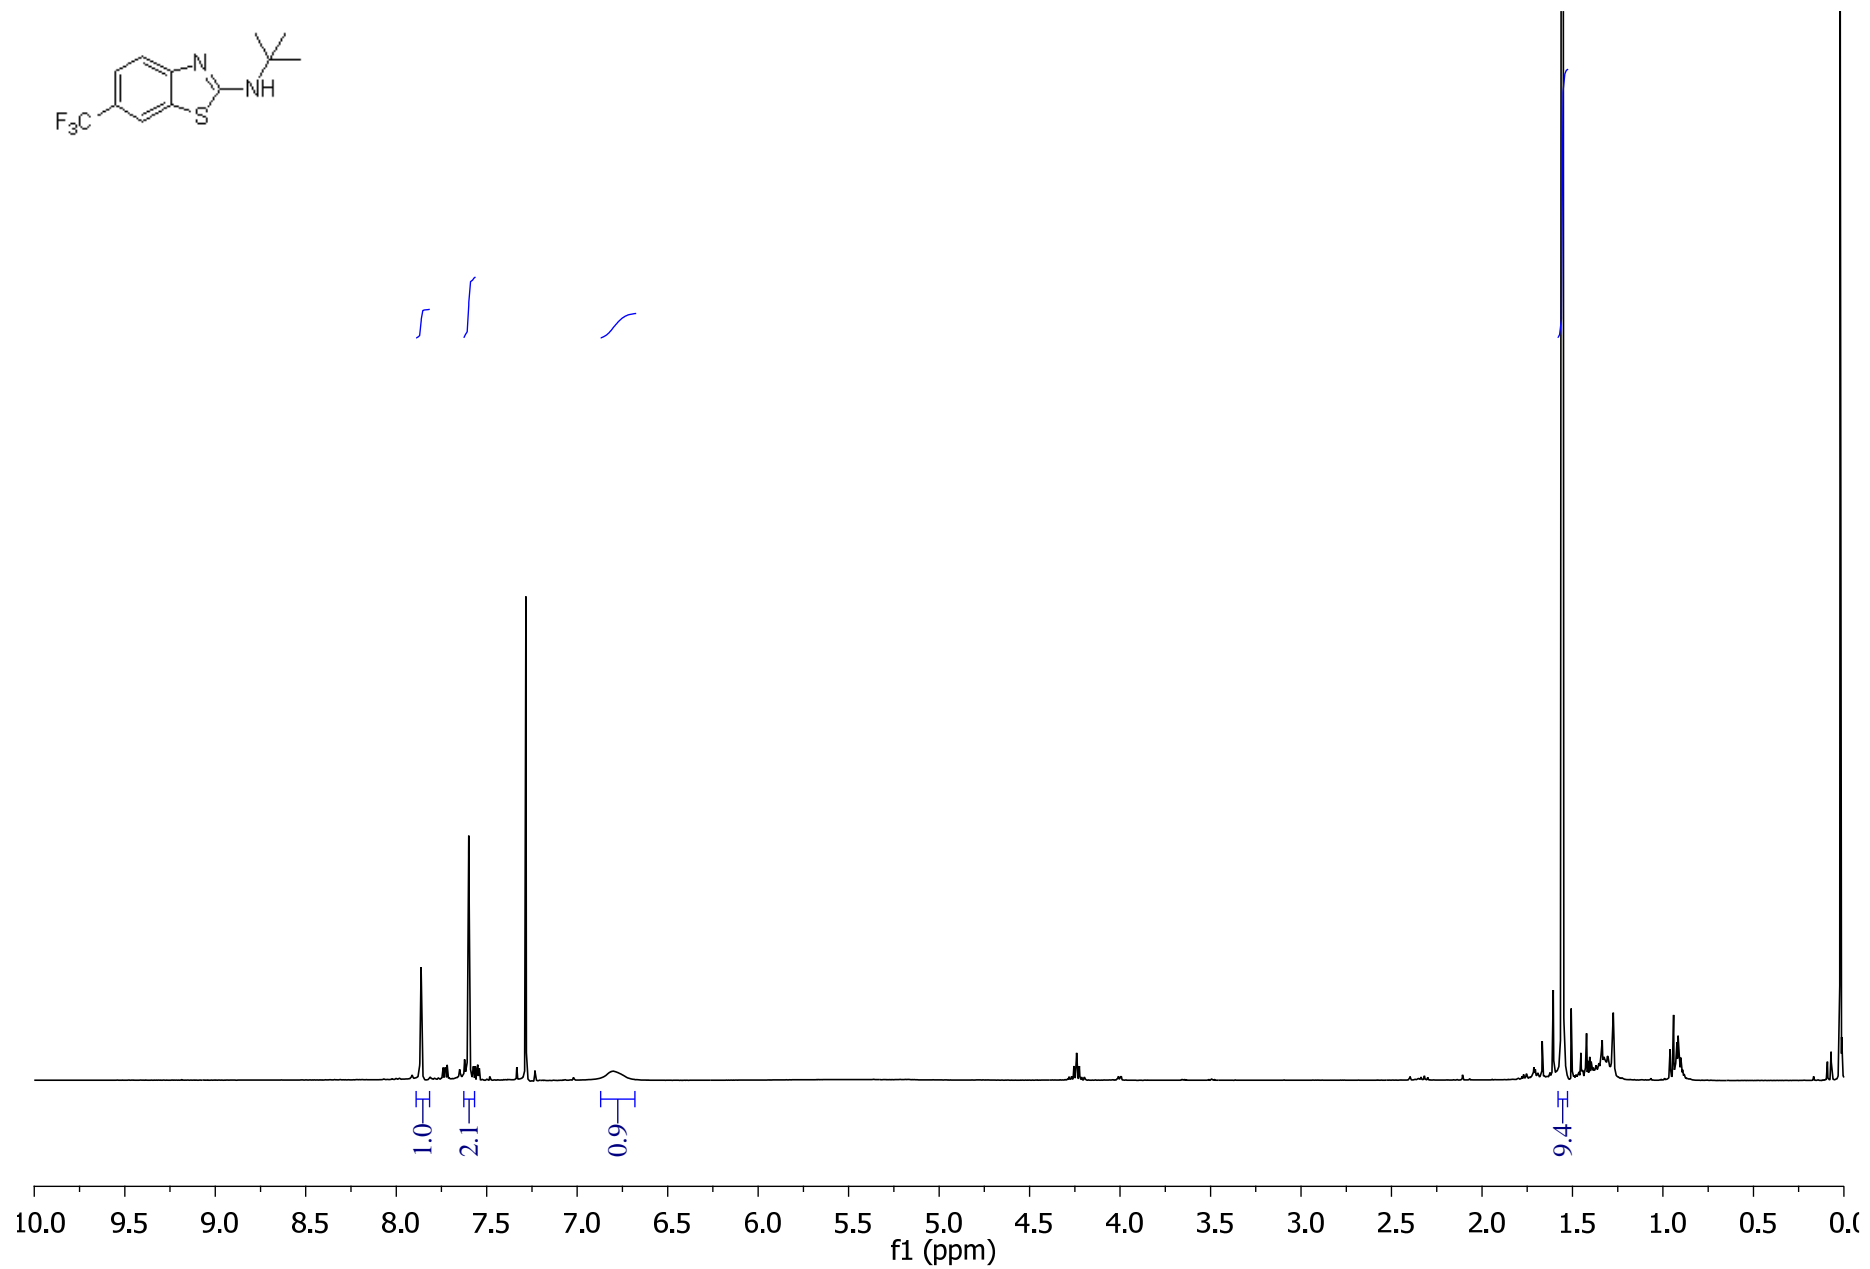

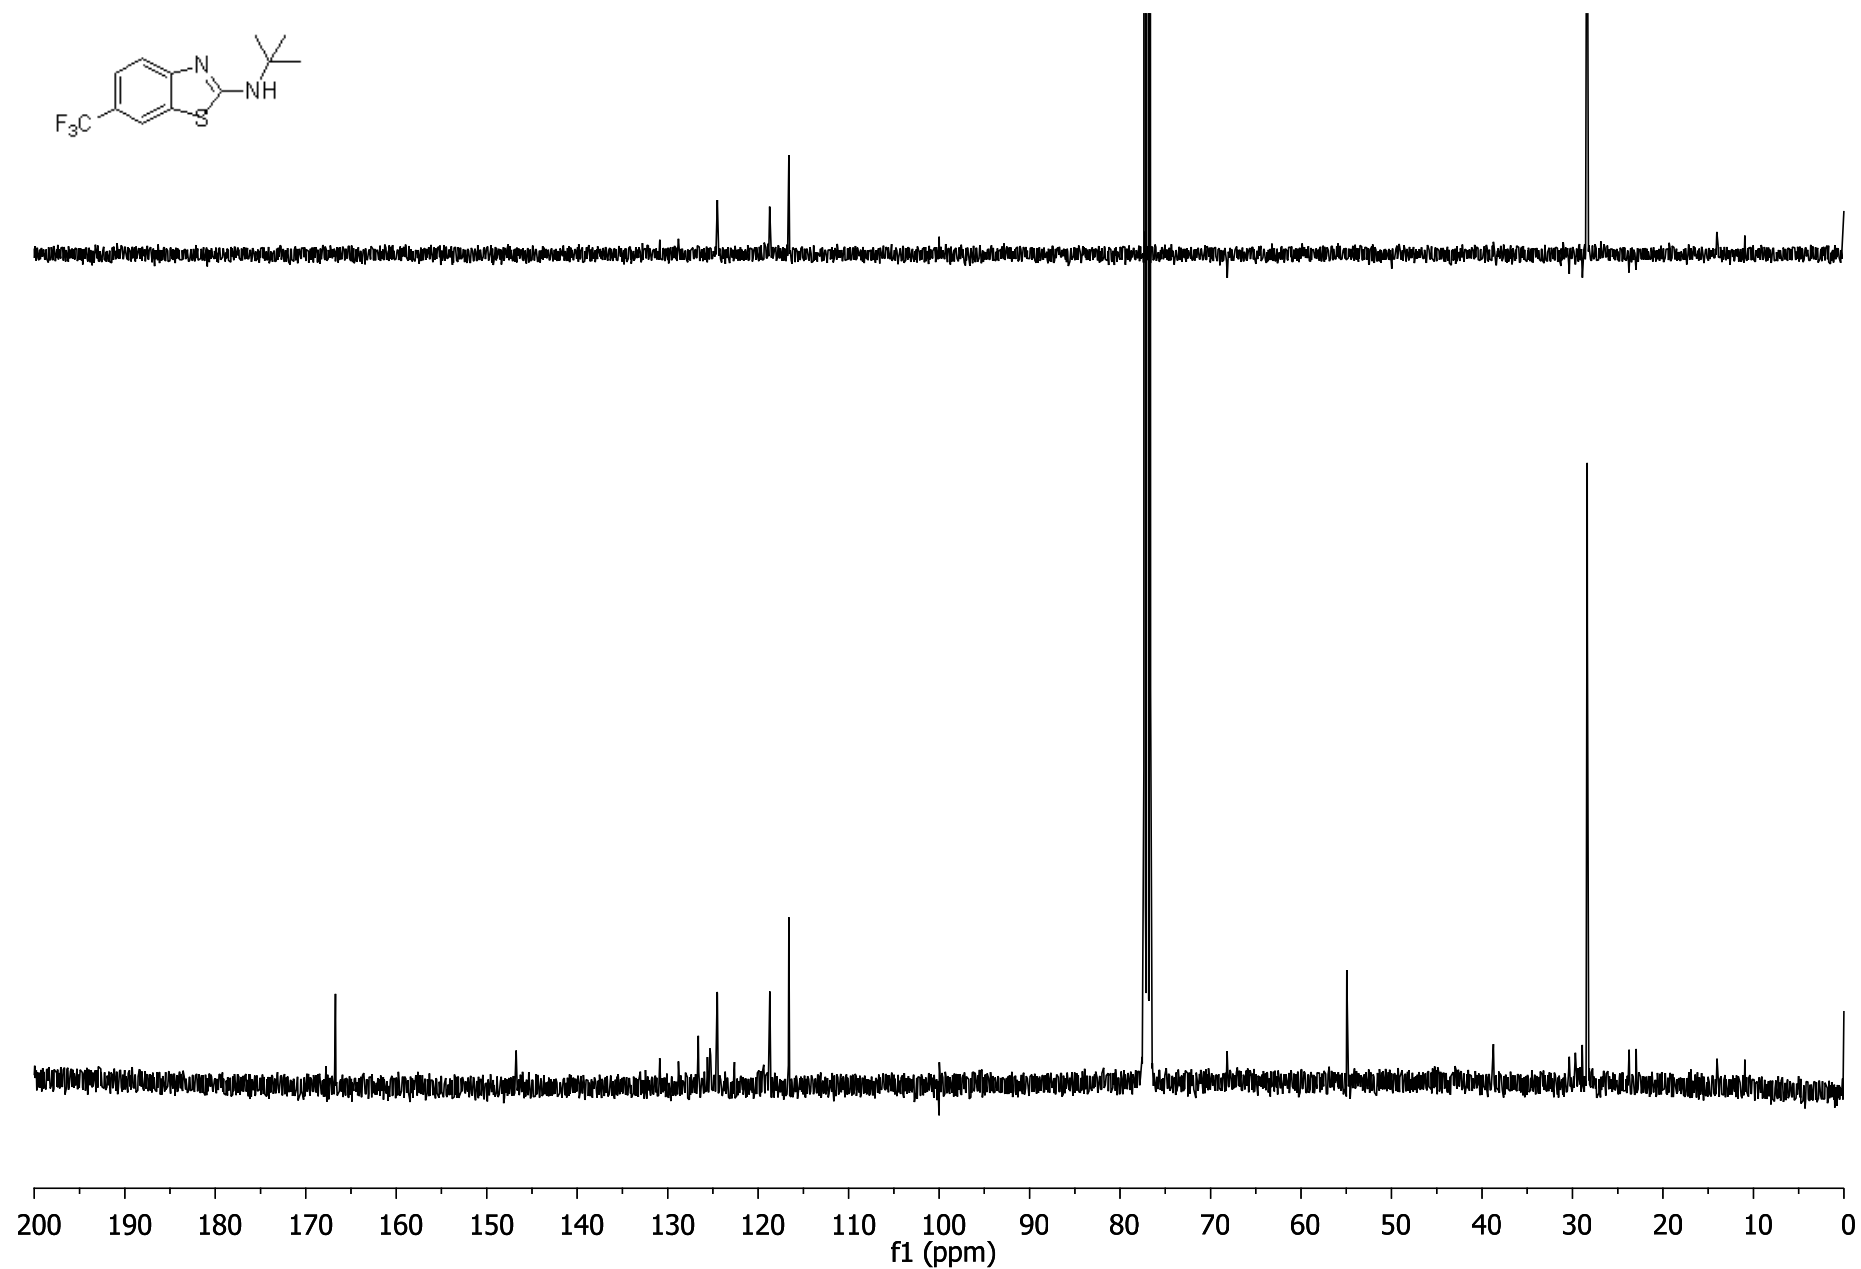

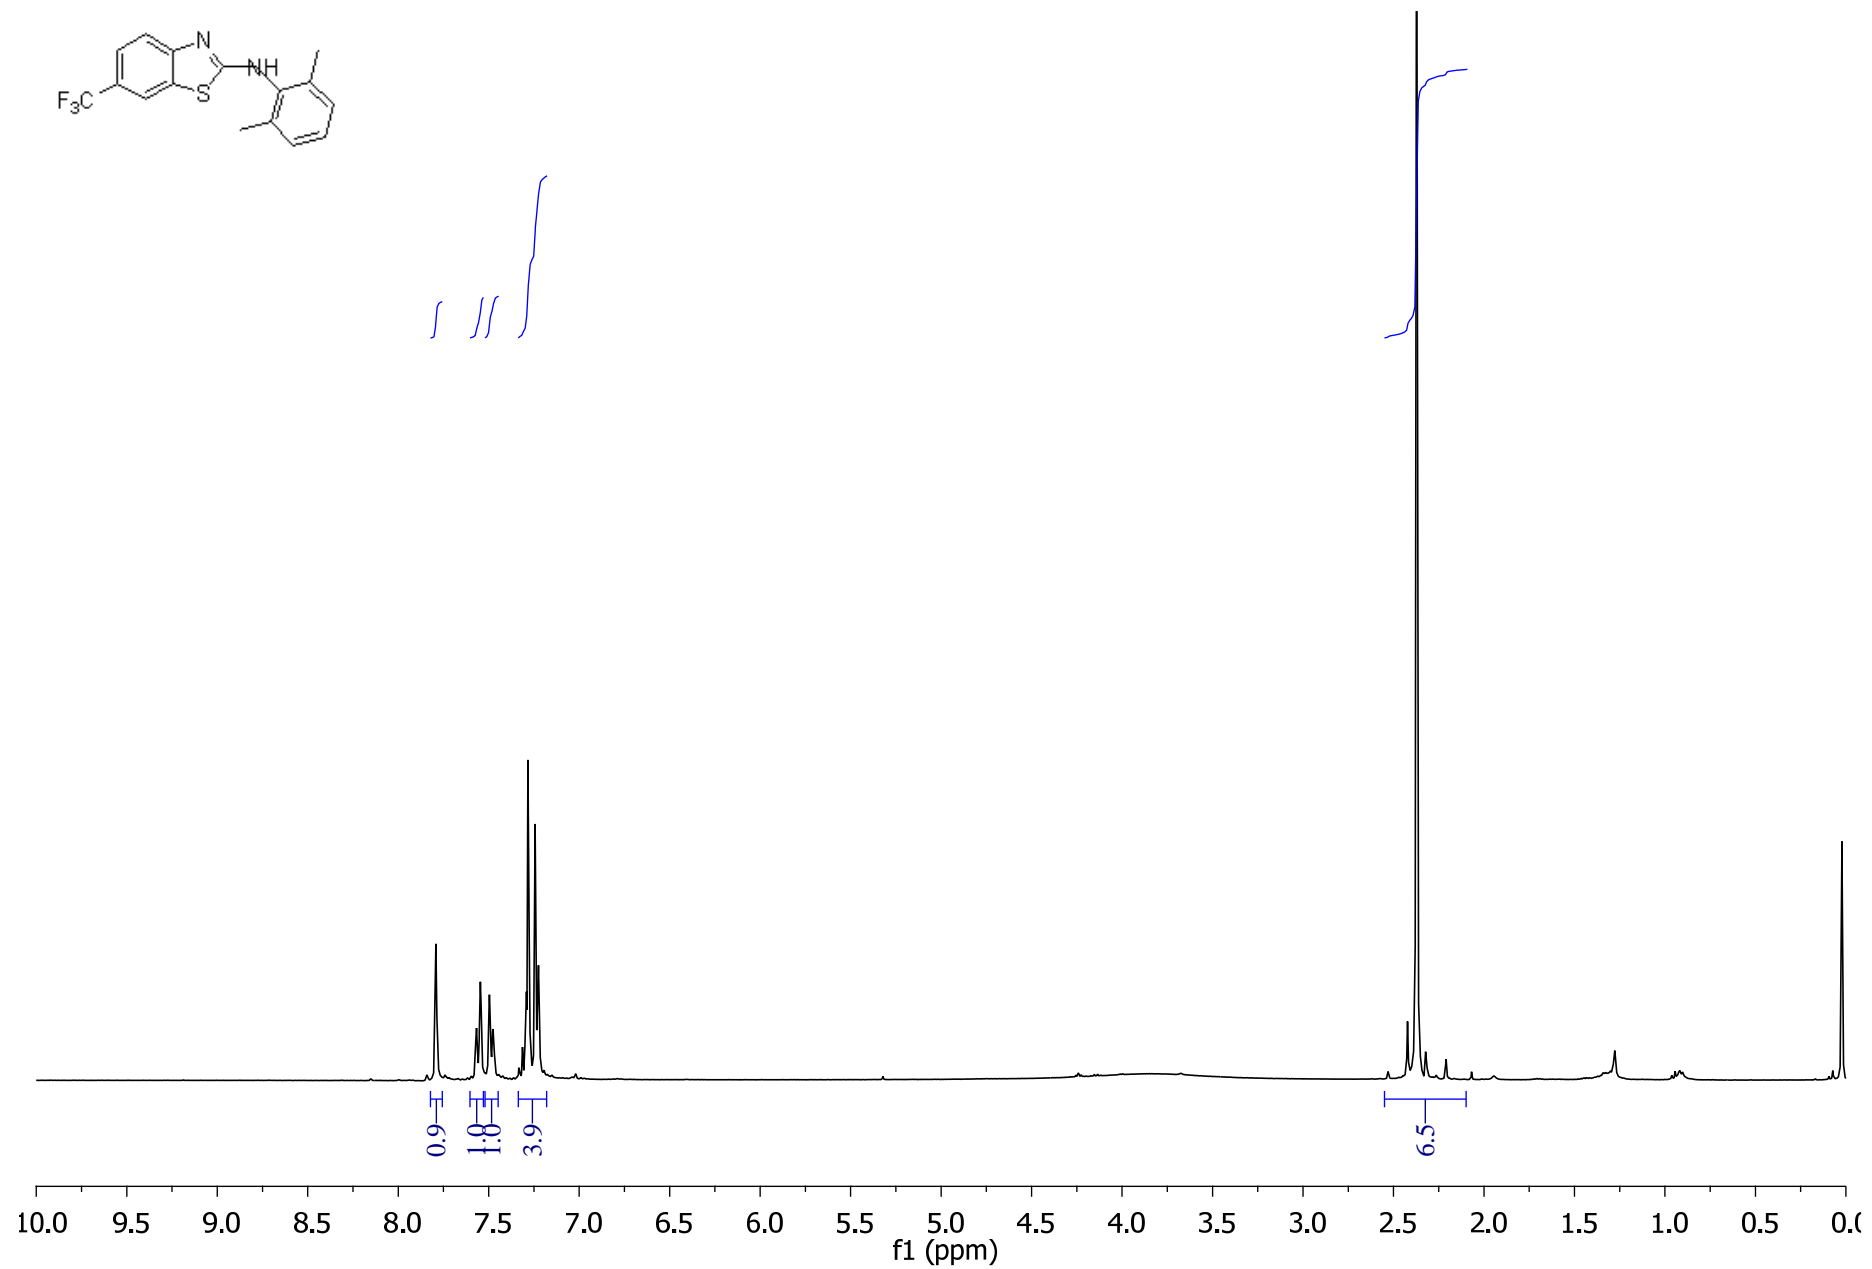



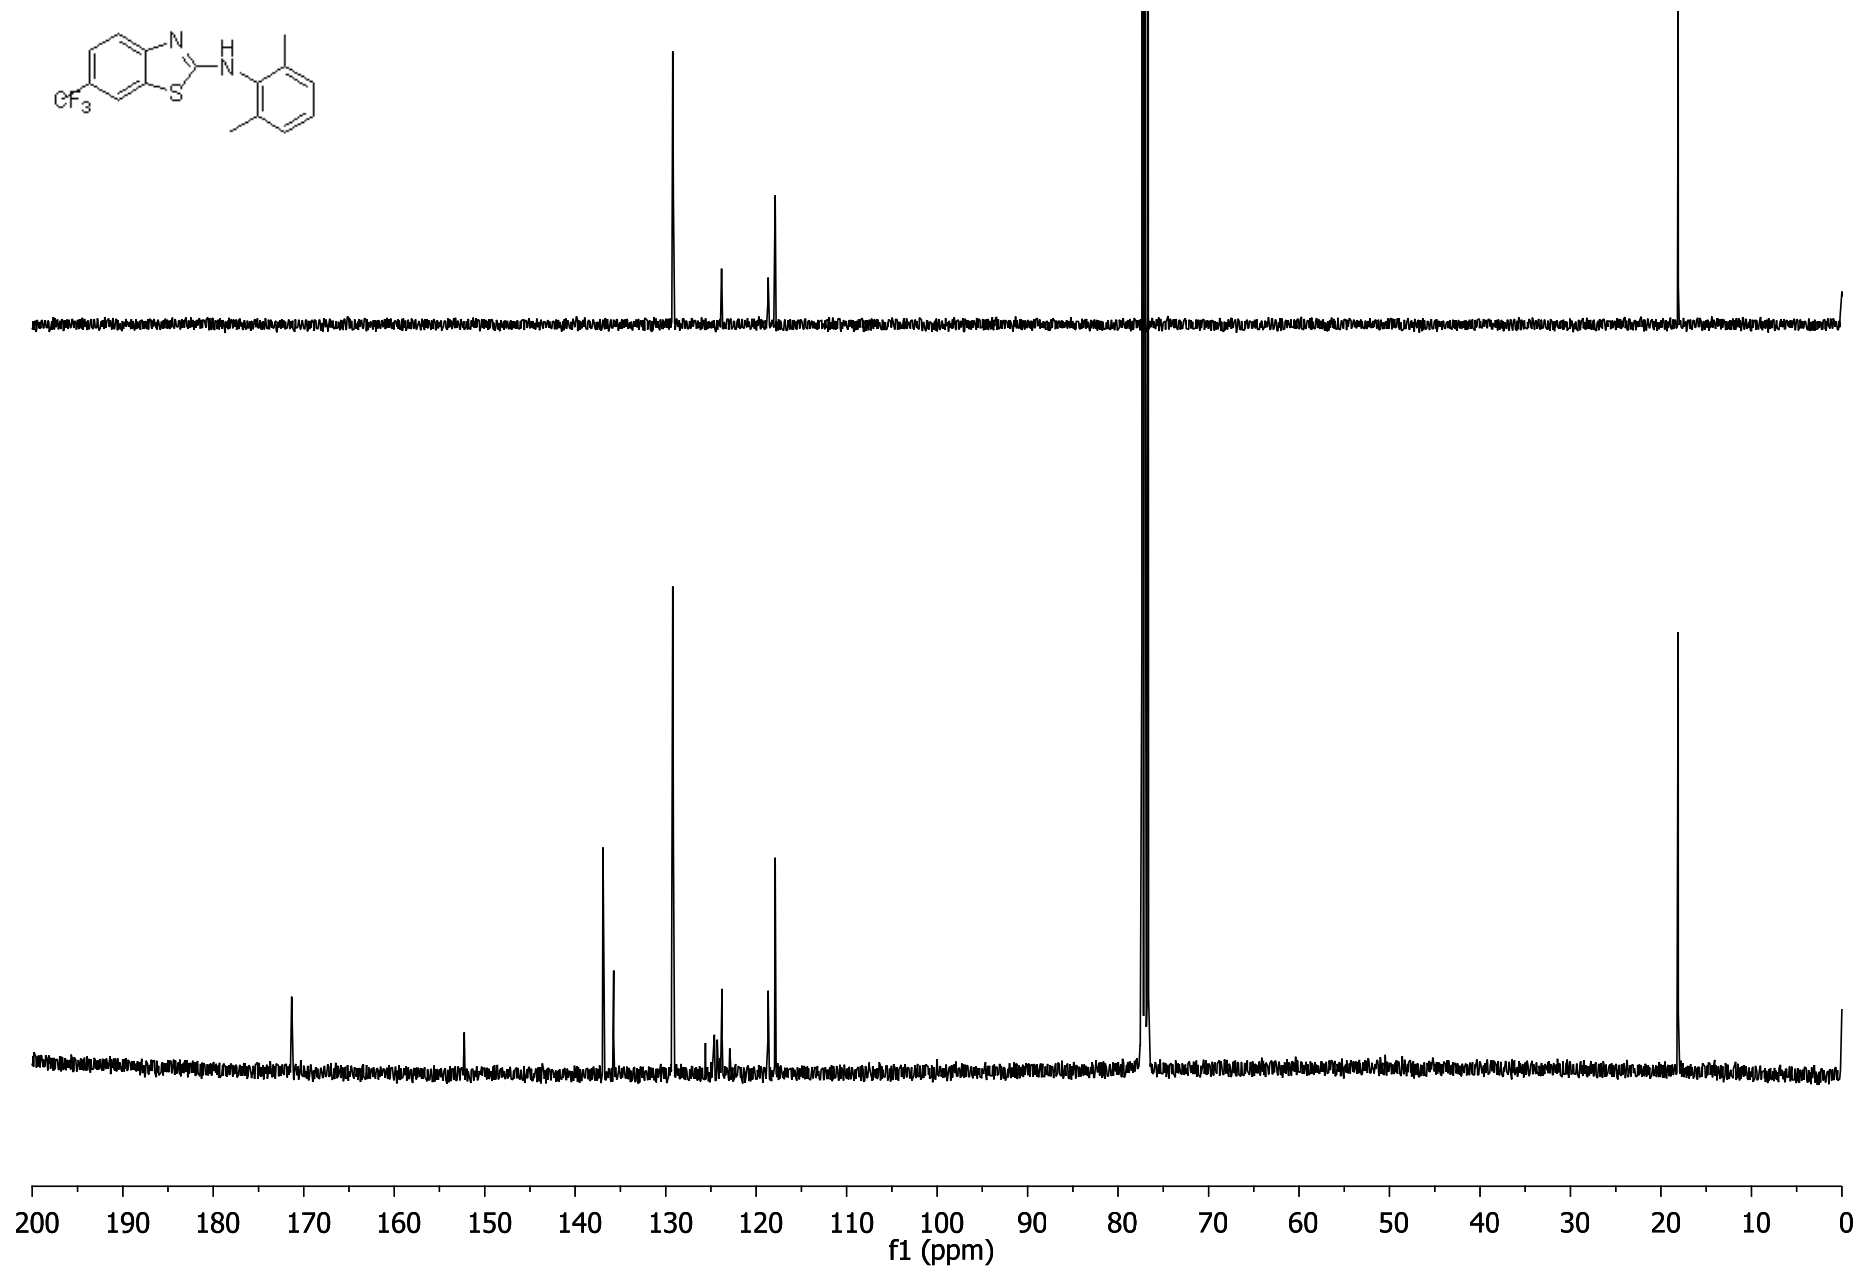

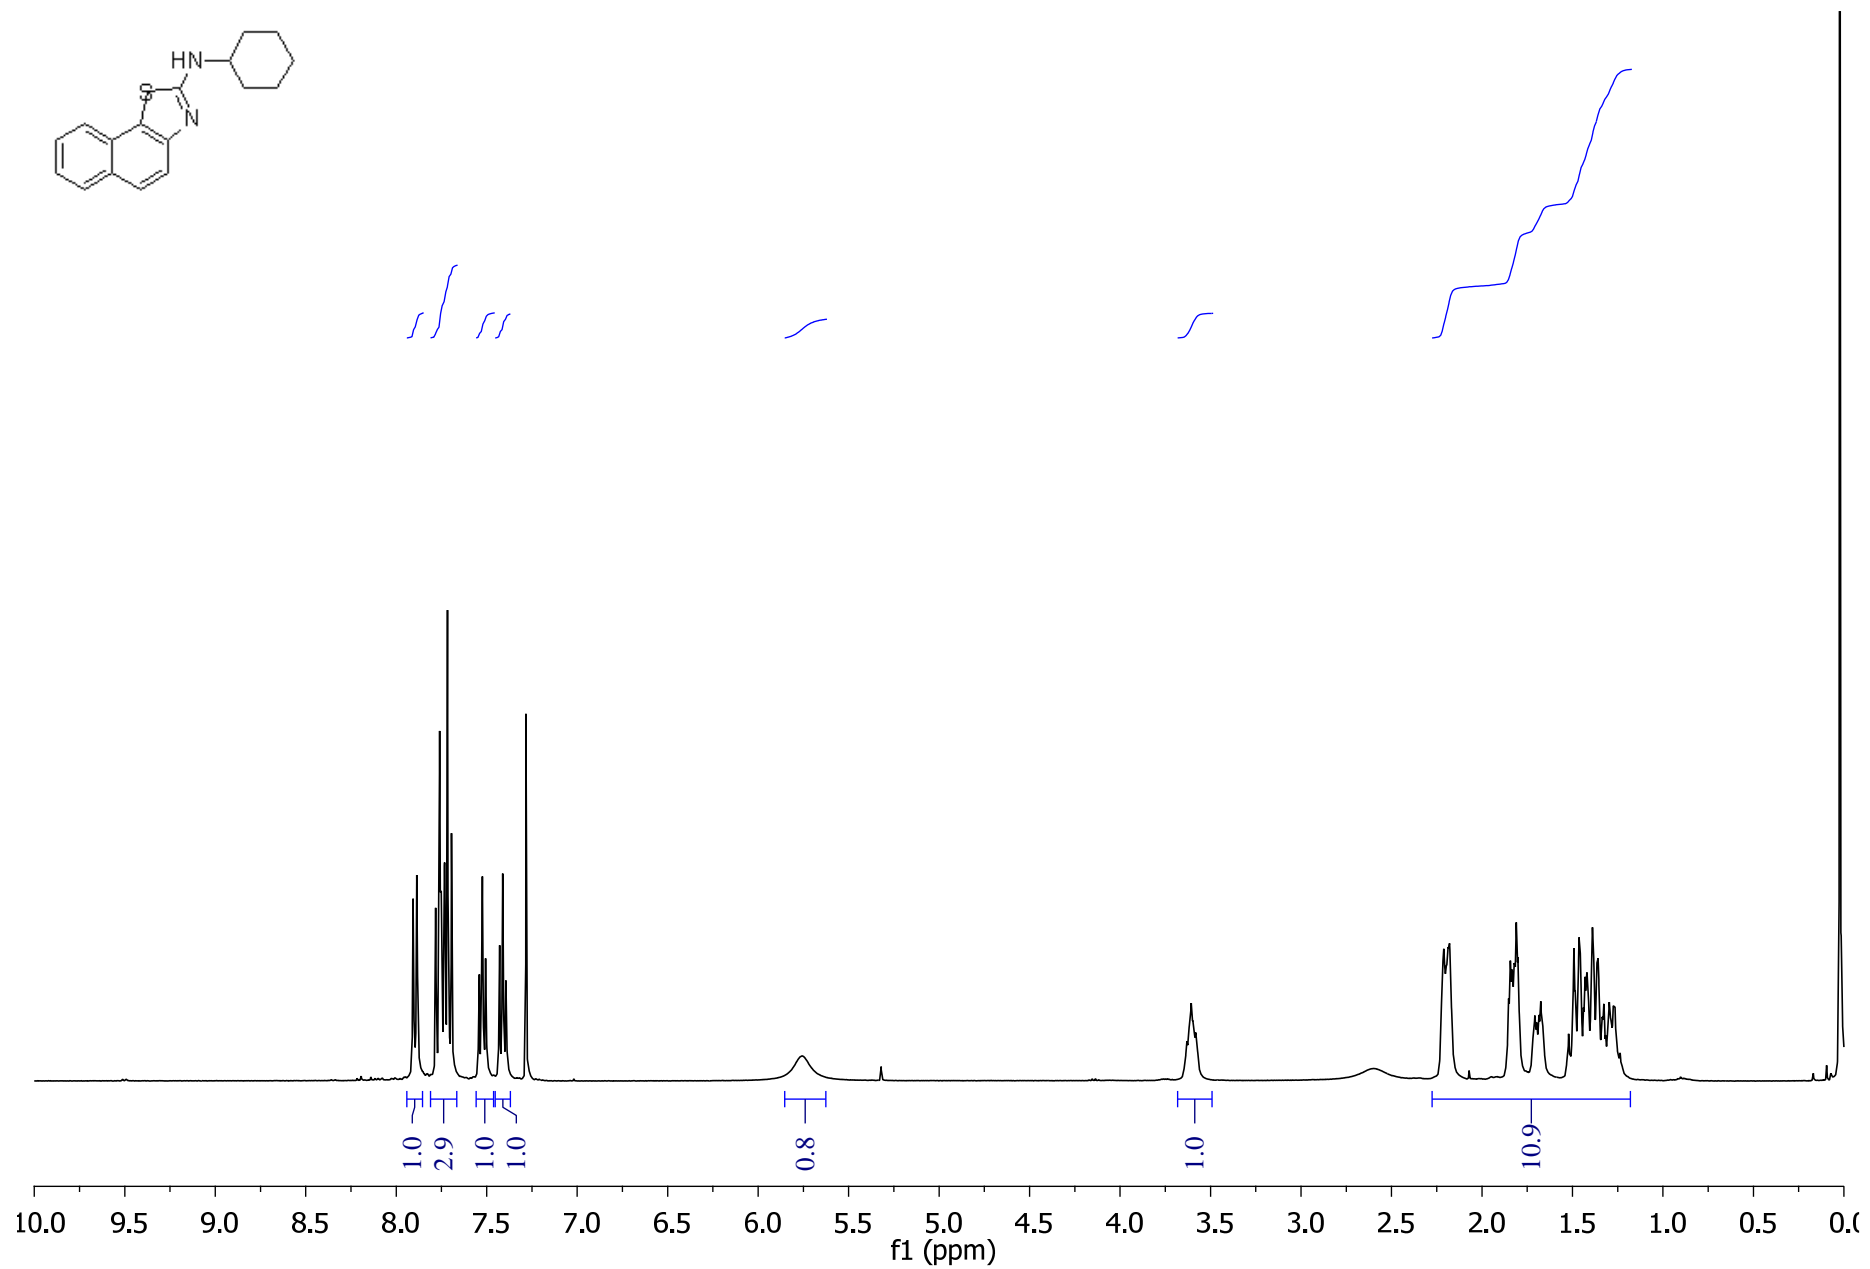

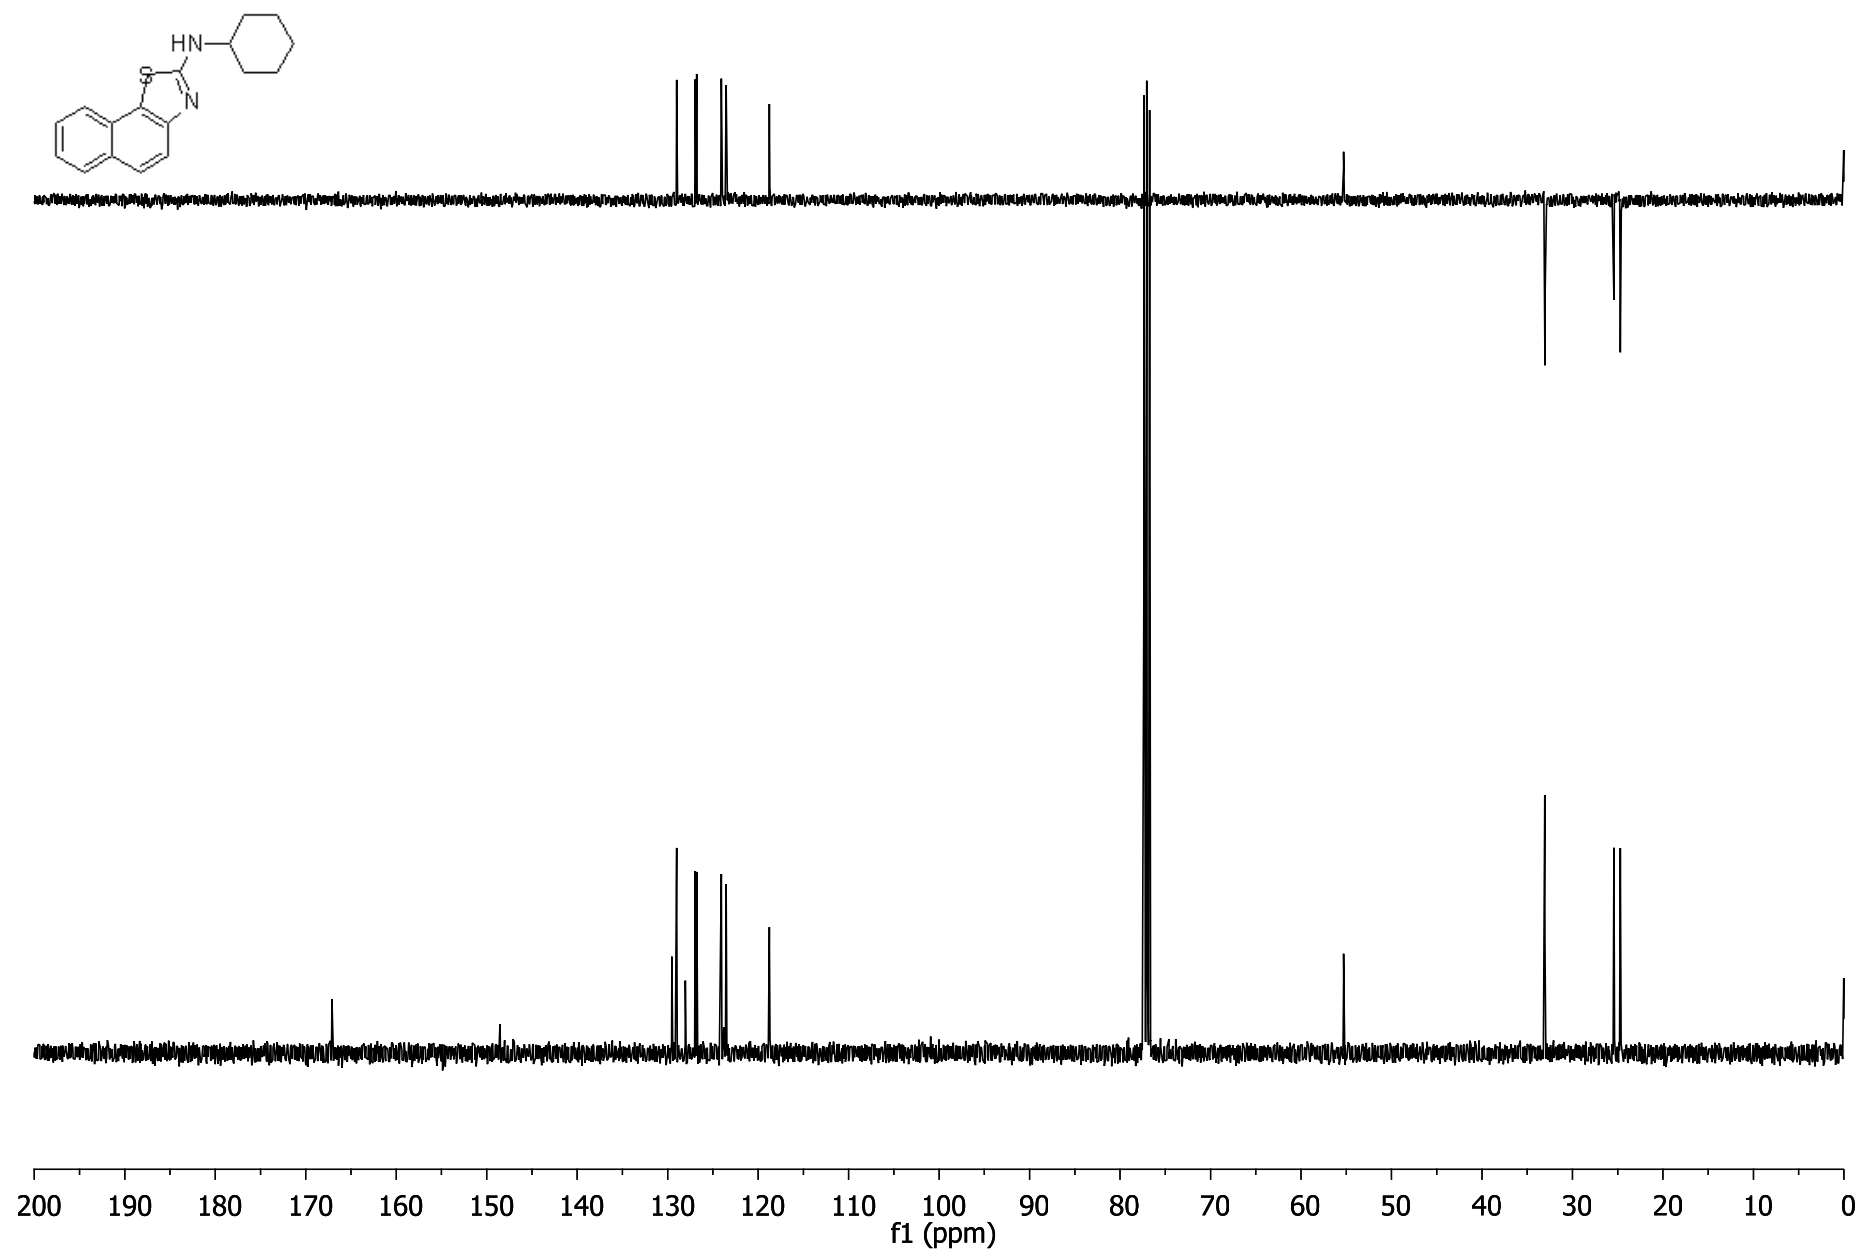

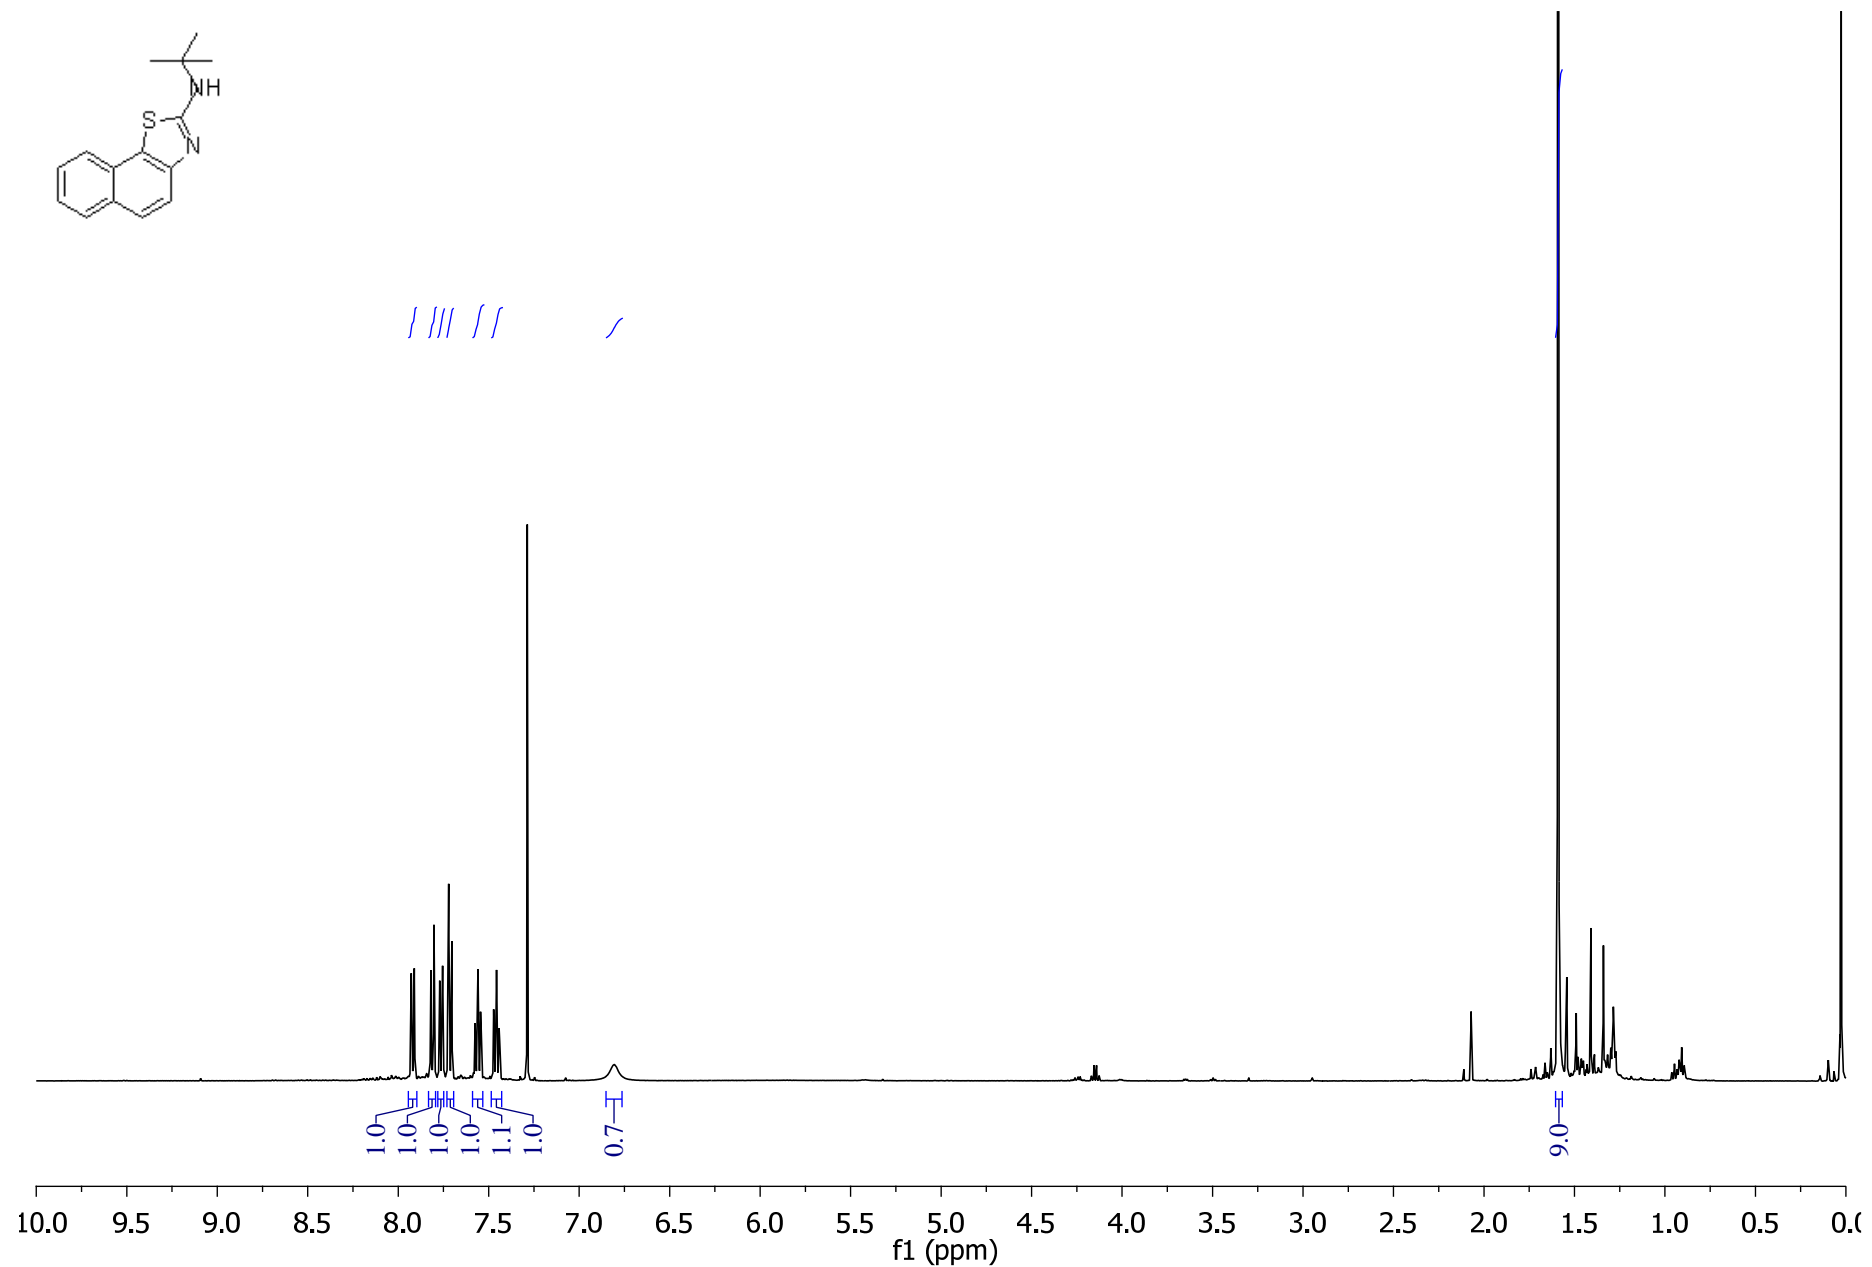

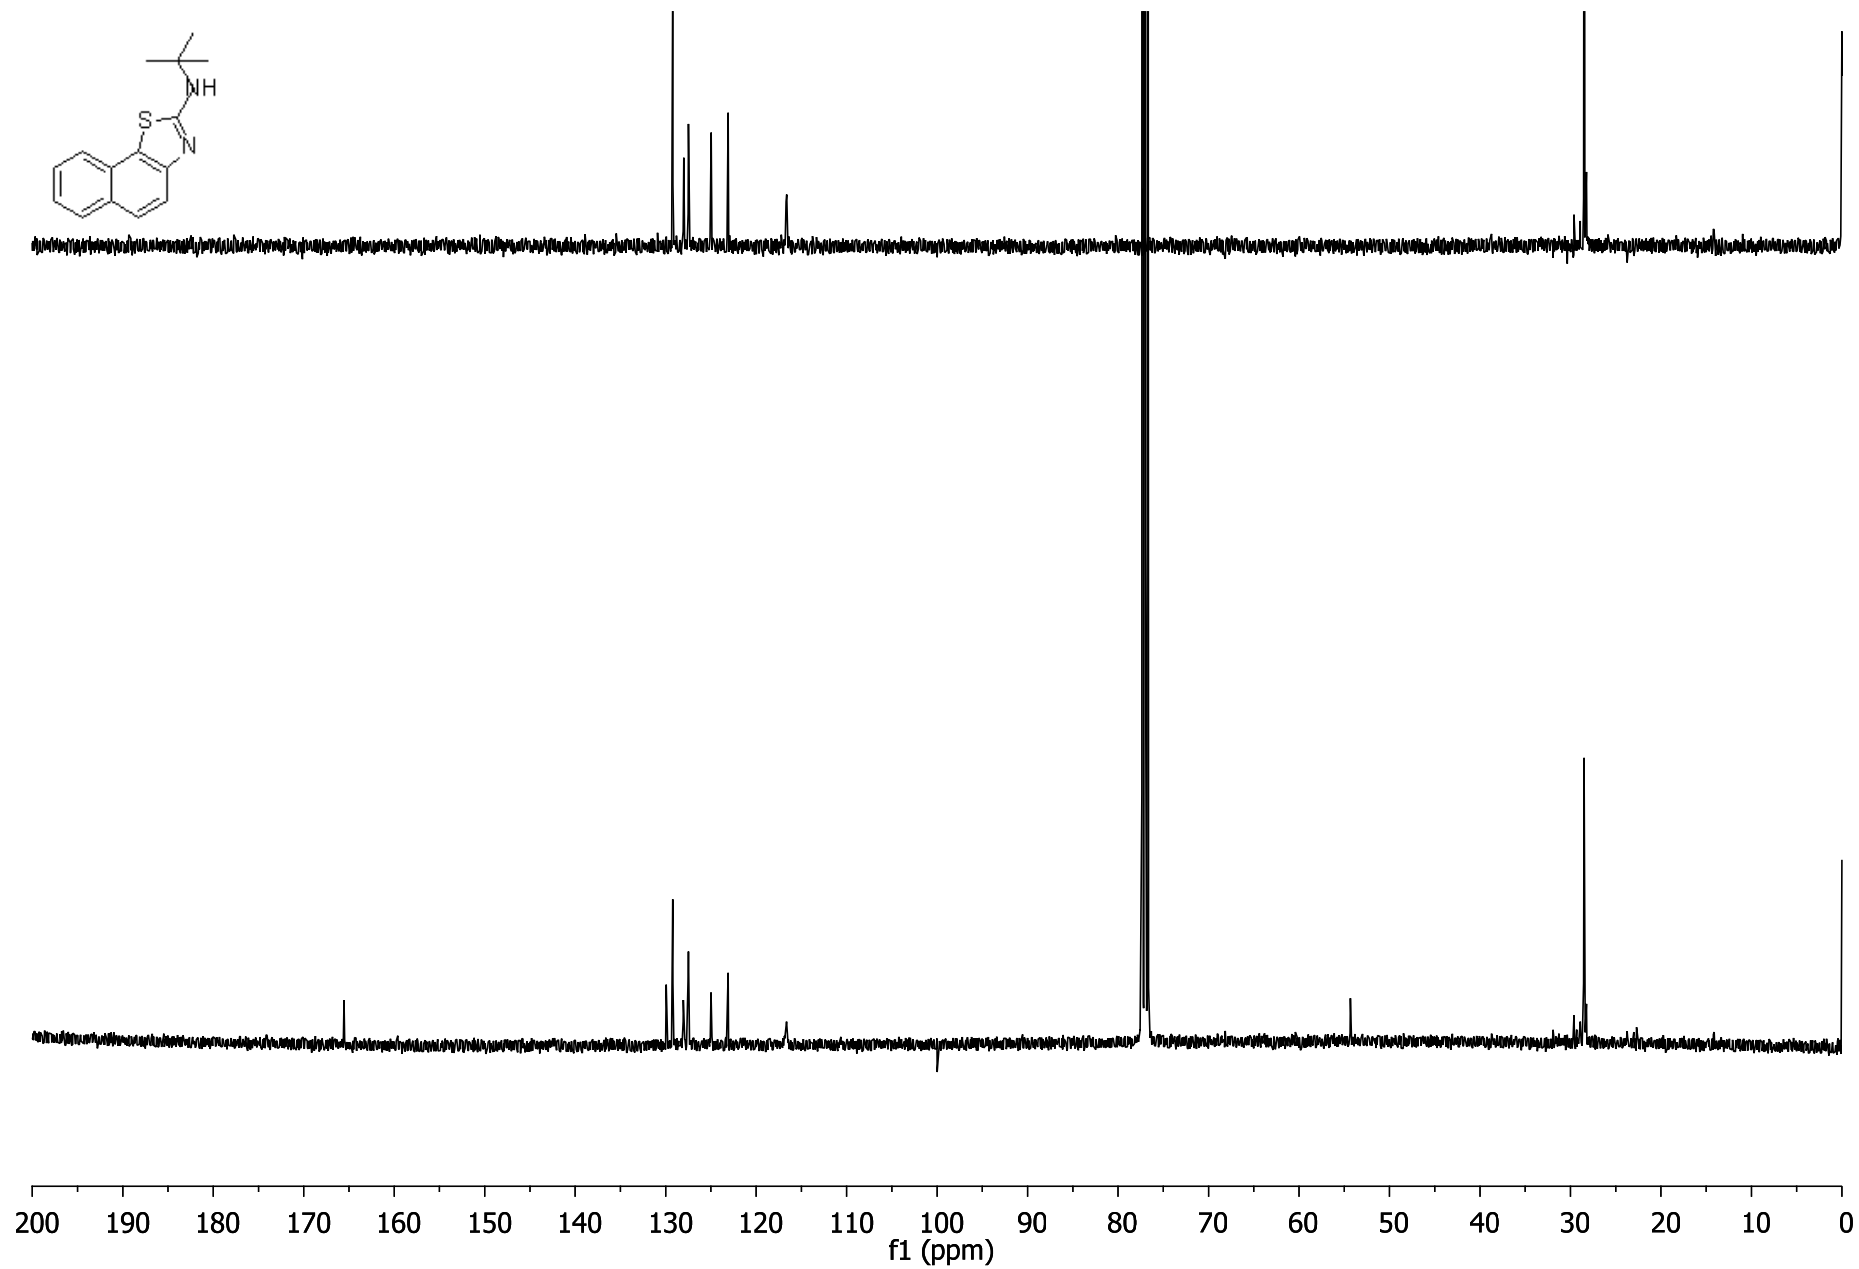

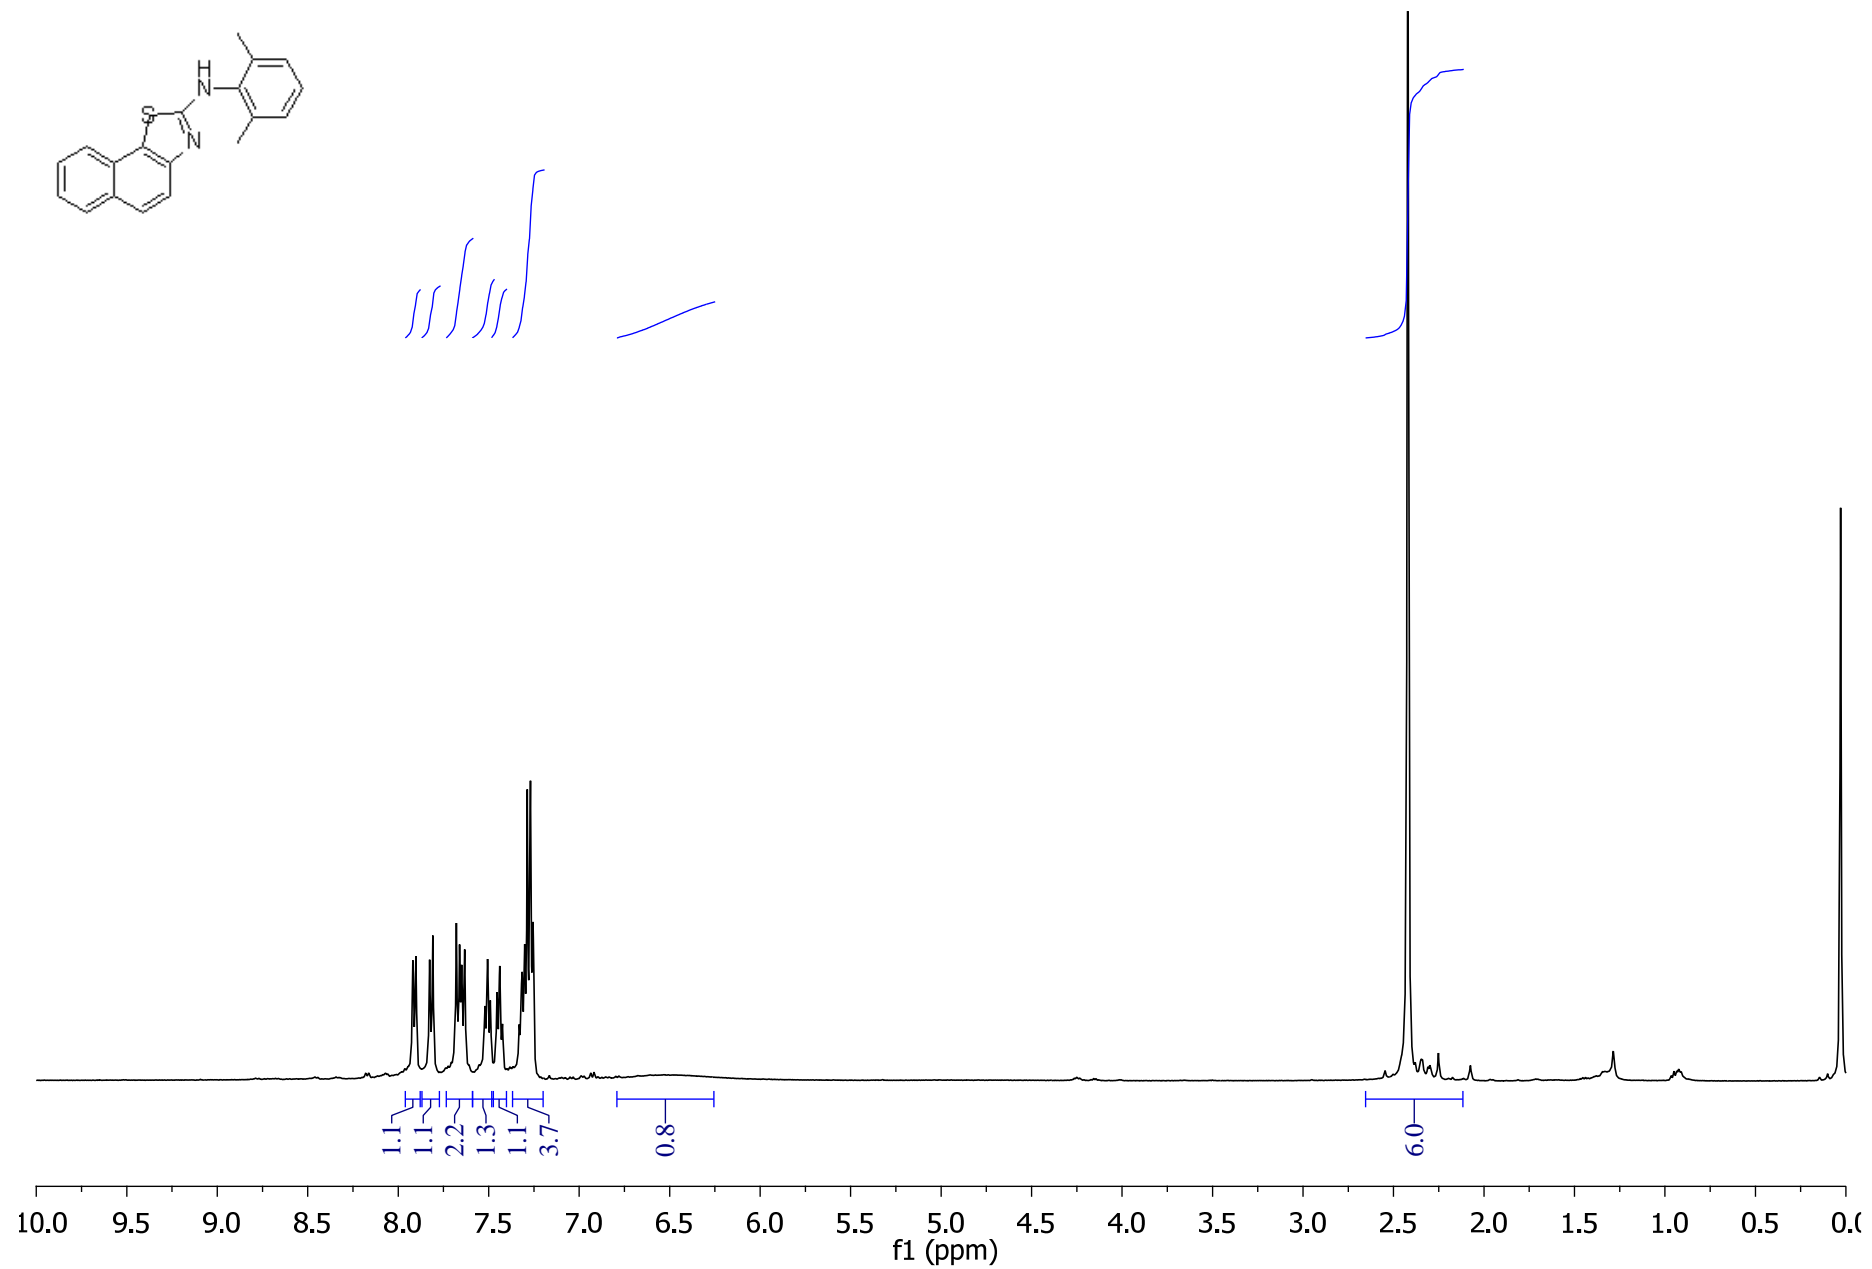

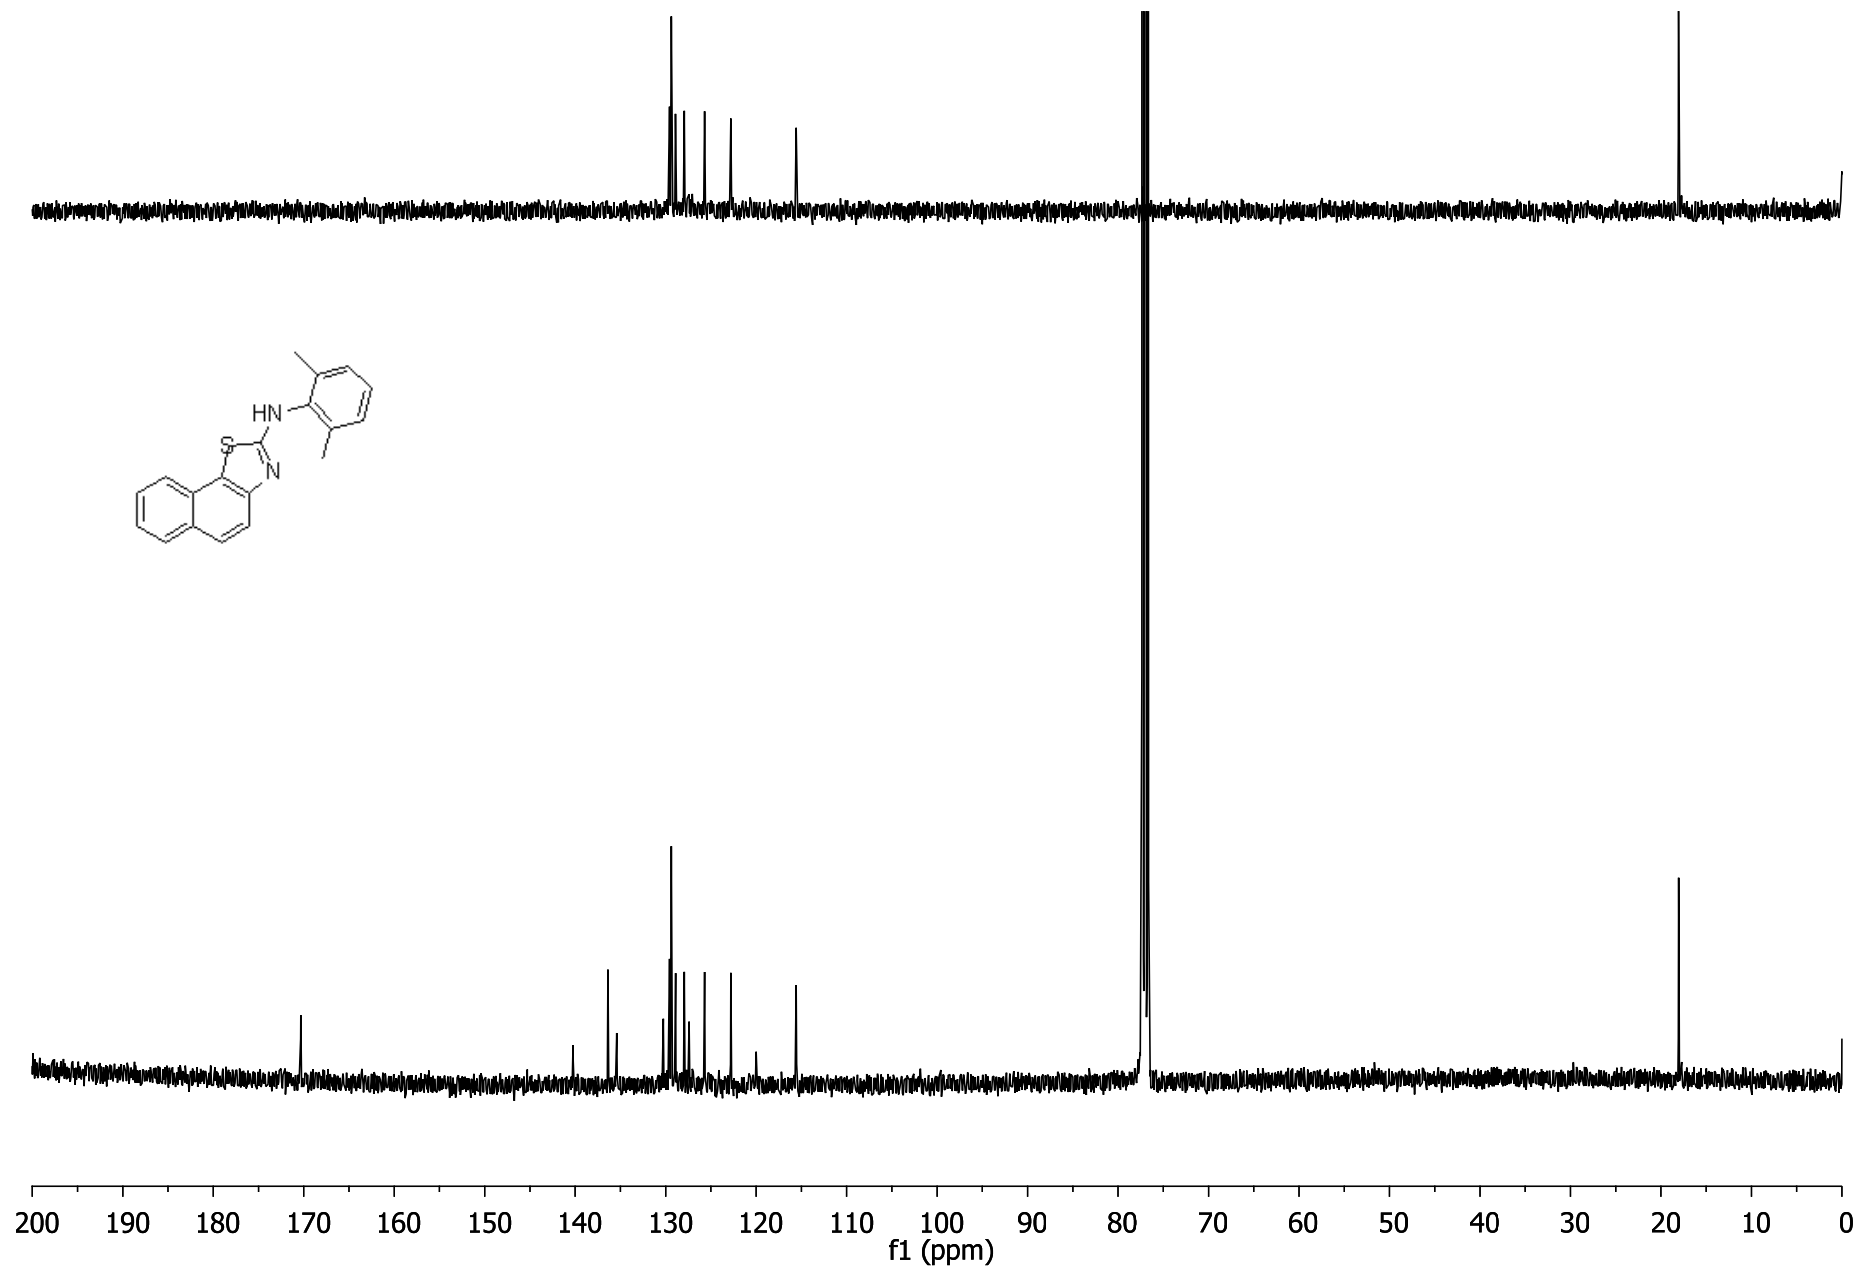

Supplement: c1ob05398a.pdf [file c1ob05398a.pdf]
